# Supplementary material for: Estimating Improved Partitioning Schemes for Ultraconserved Elements
Source: PubMed Central journal article supplement — Mol Biol Evol. 2018 Apr 11;35(7):1798–811. doi: 10.1093/molbev/msy069 (PMC5995204; doi:10.1093/molbev/msy069), 2018-04-11

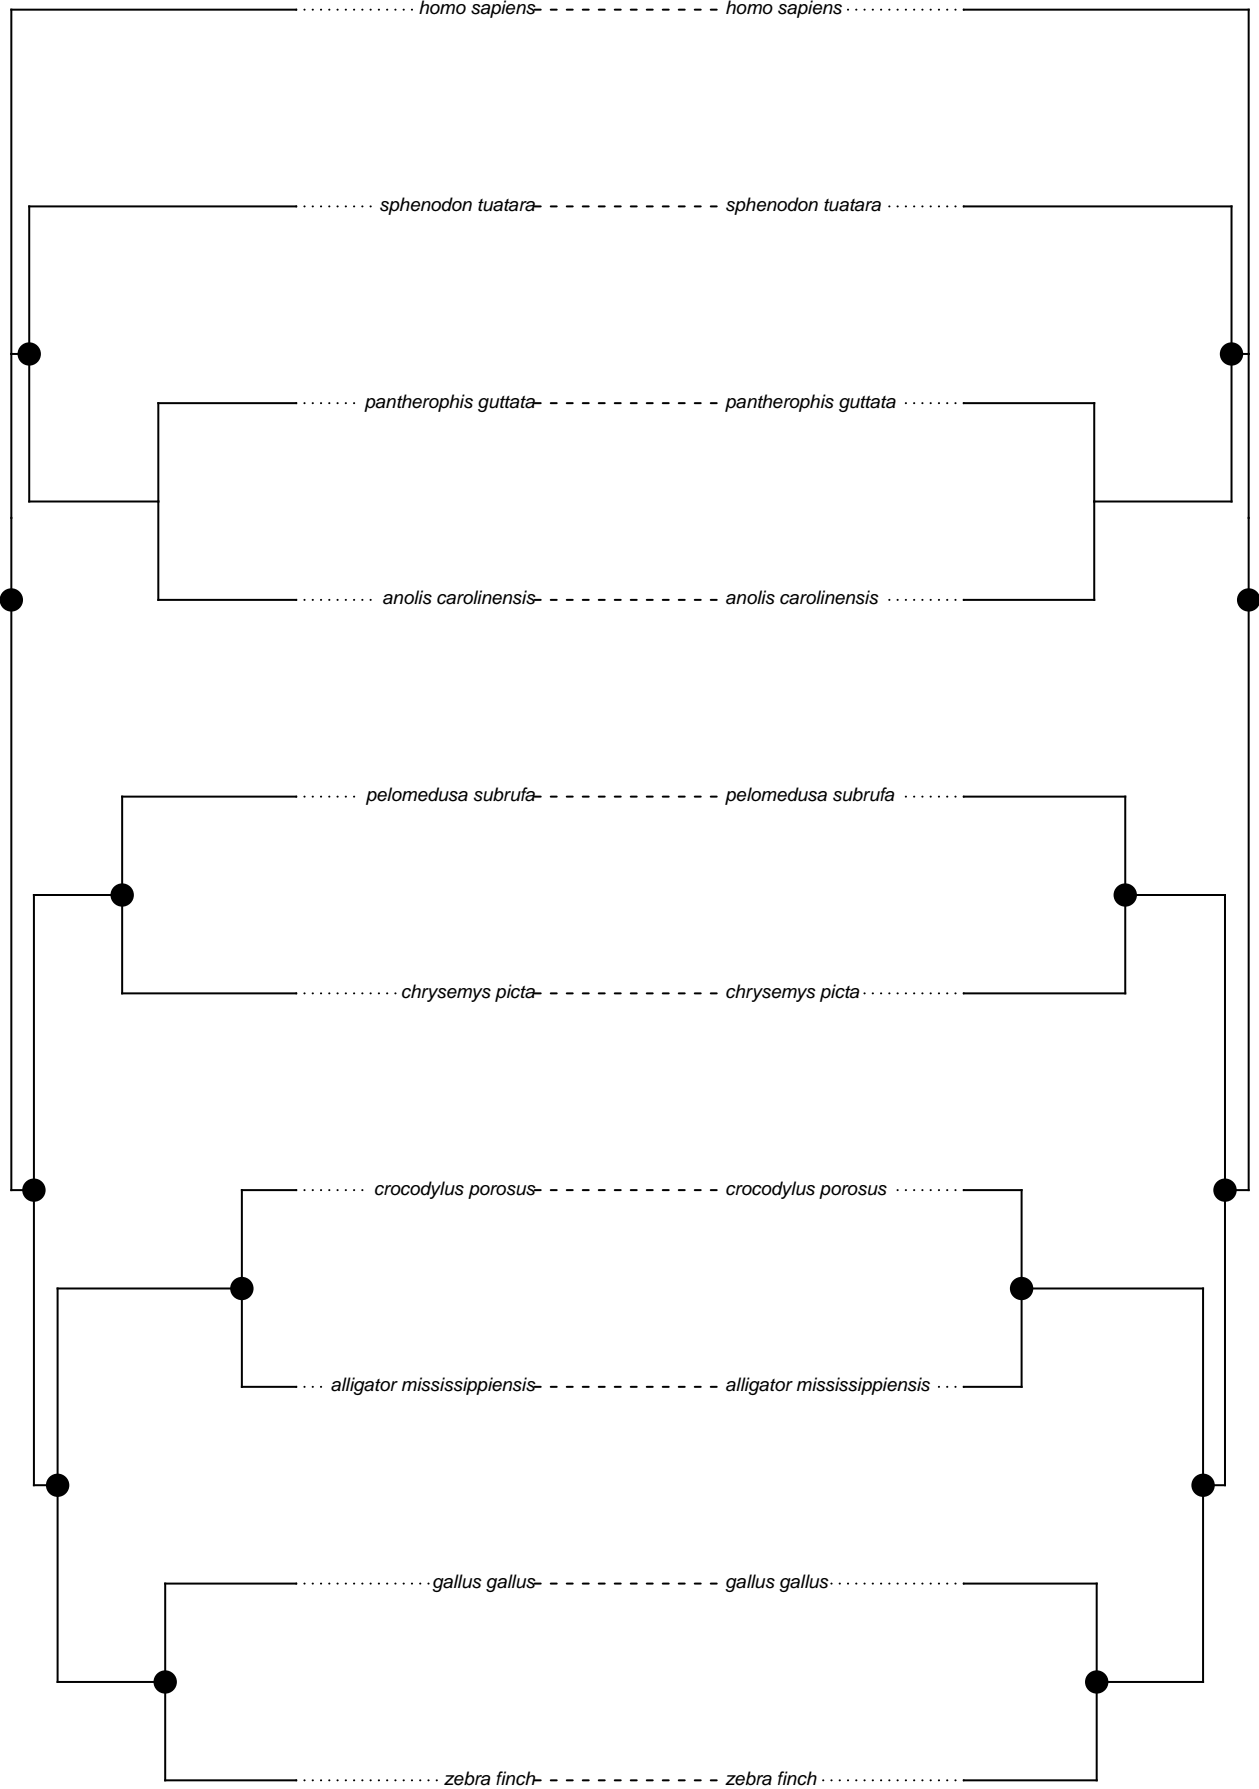

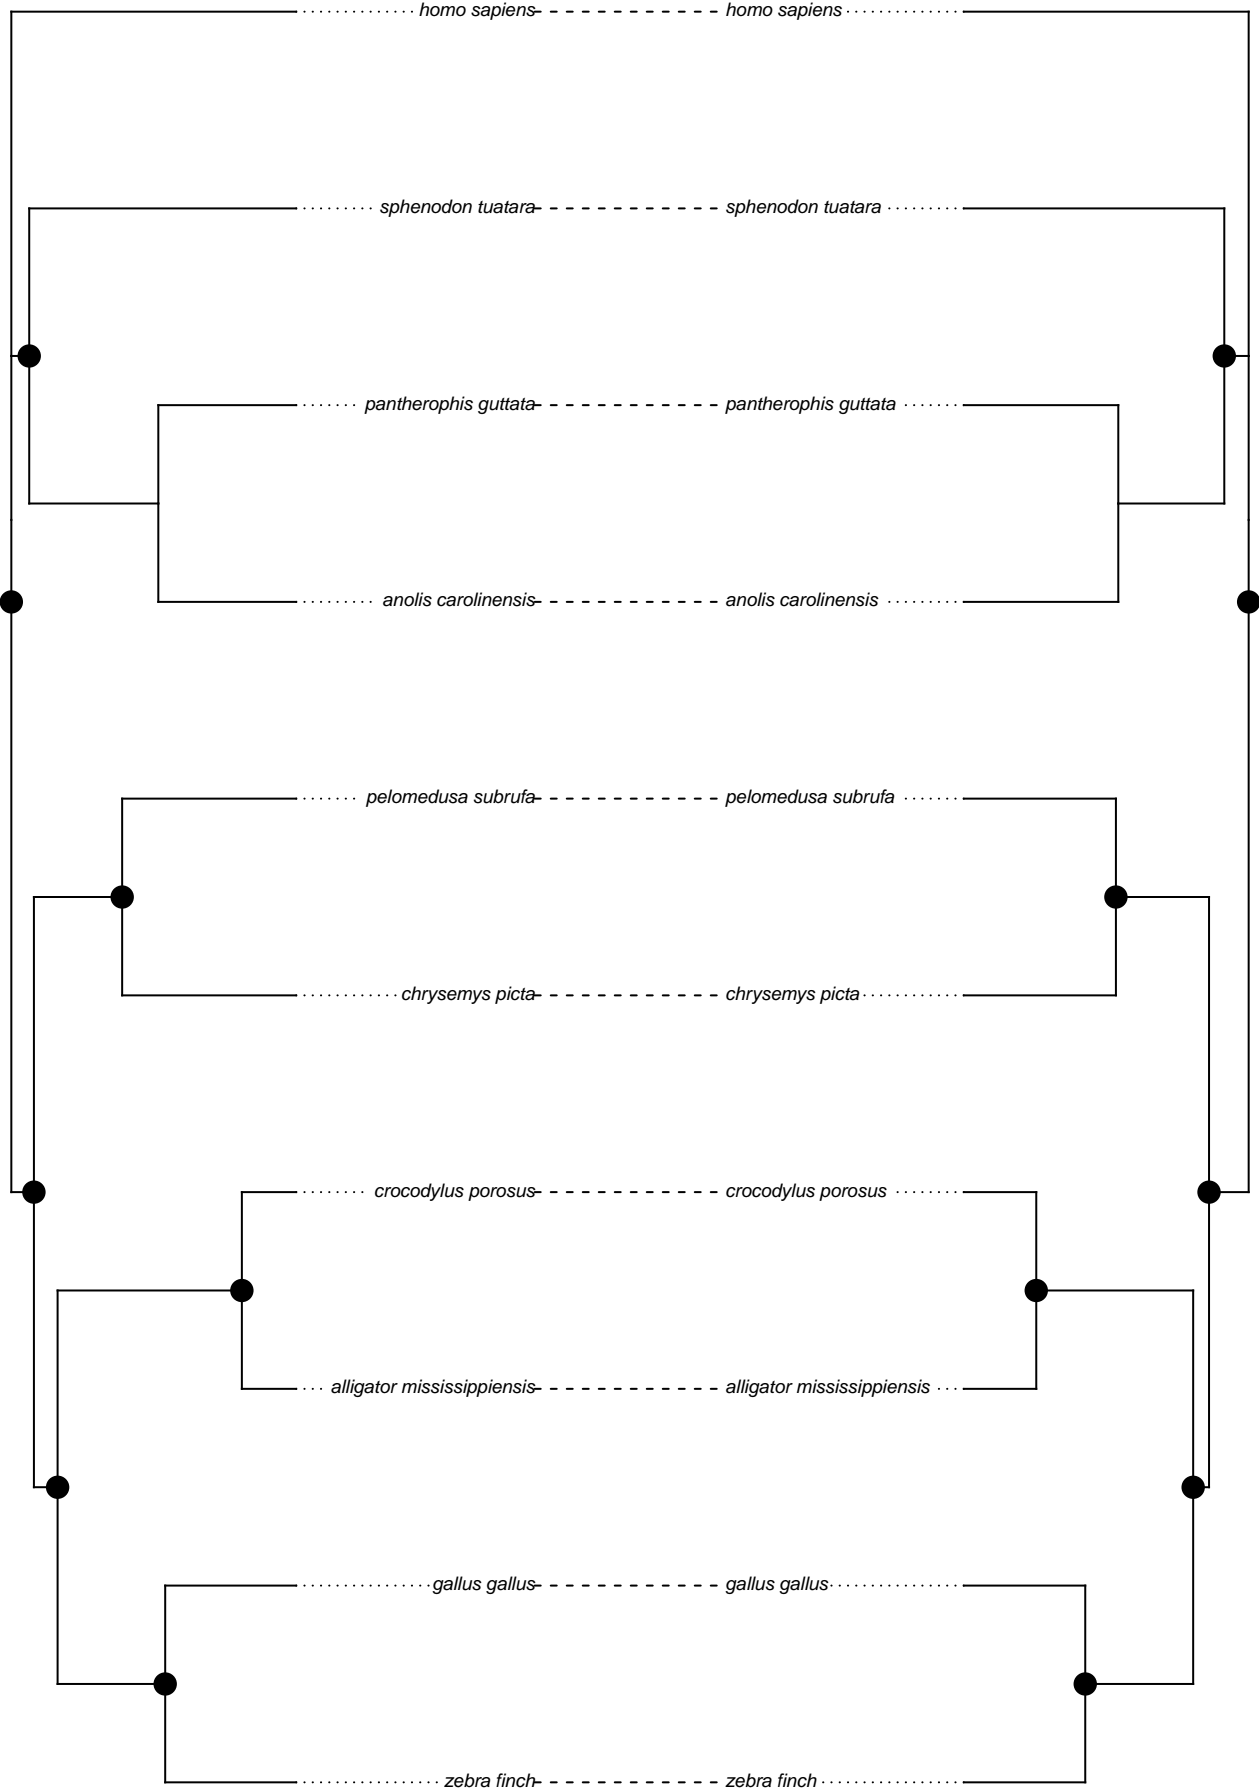

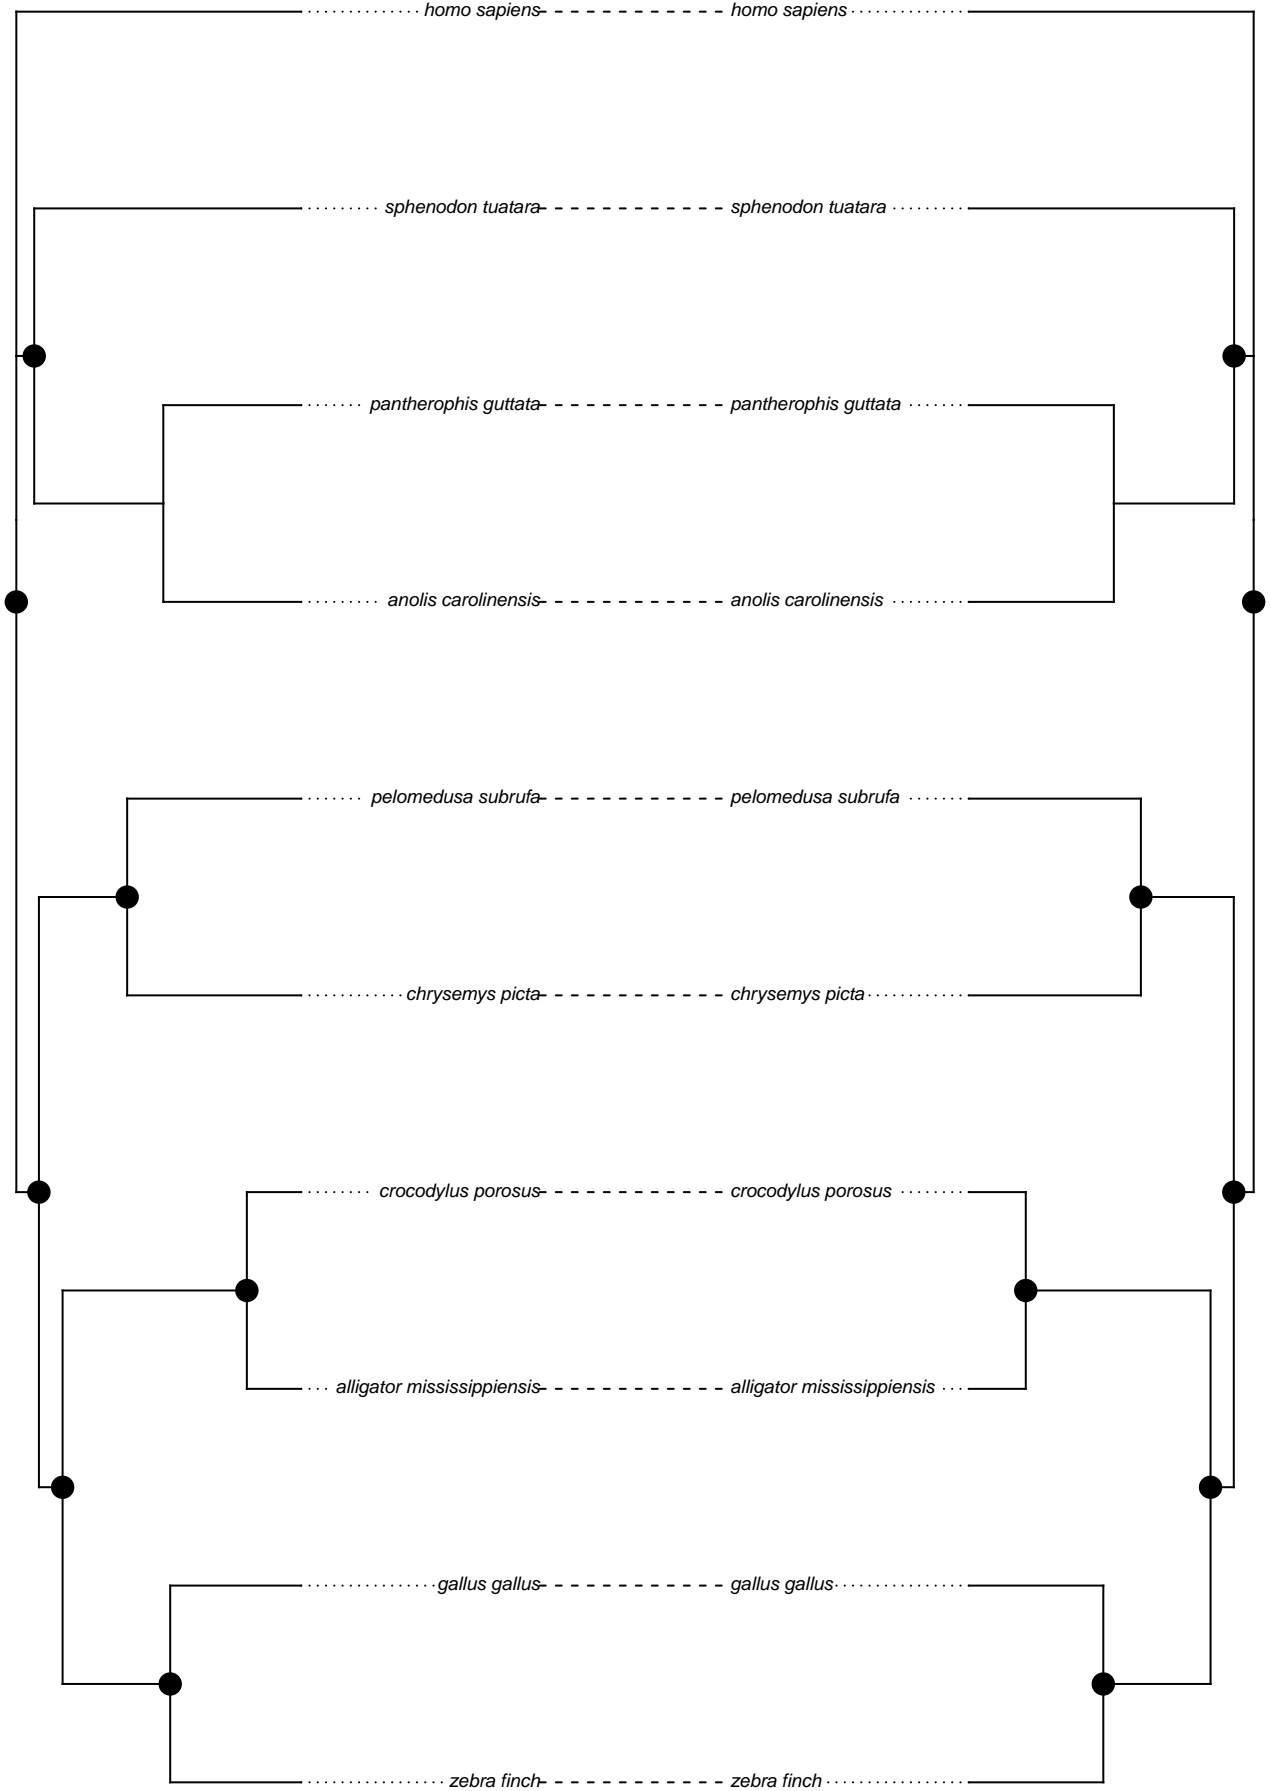

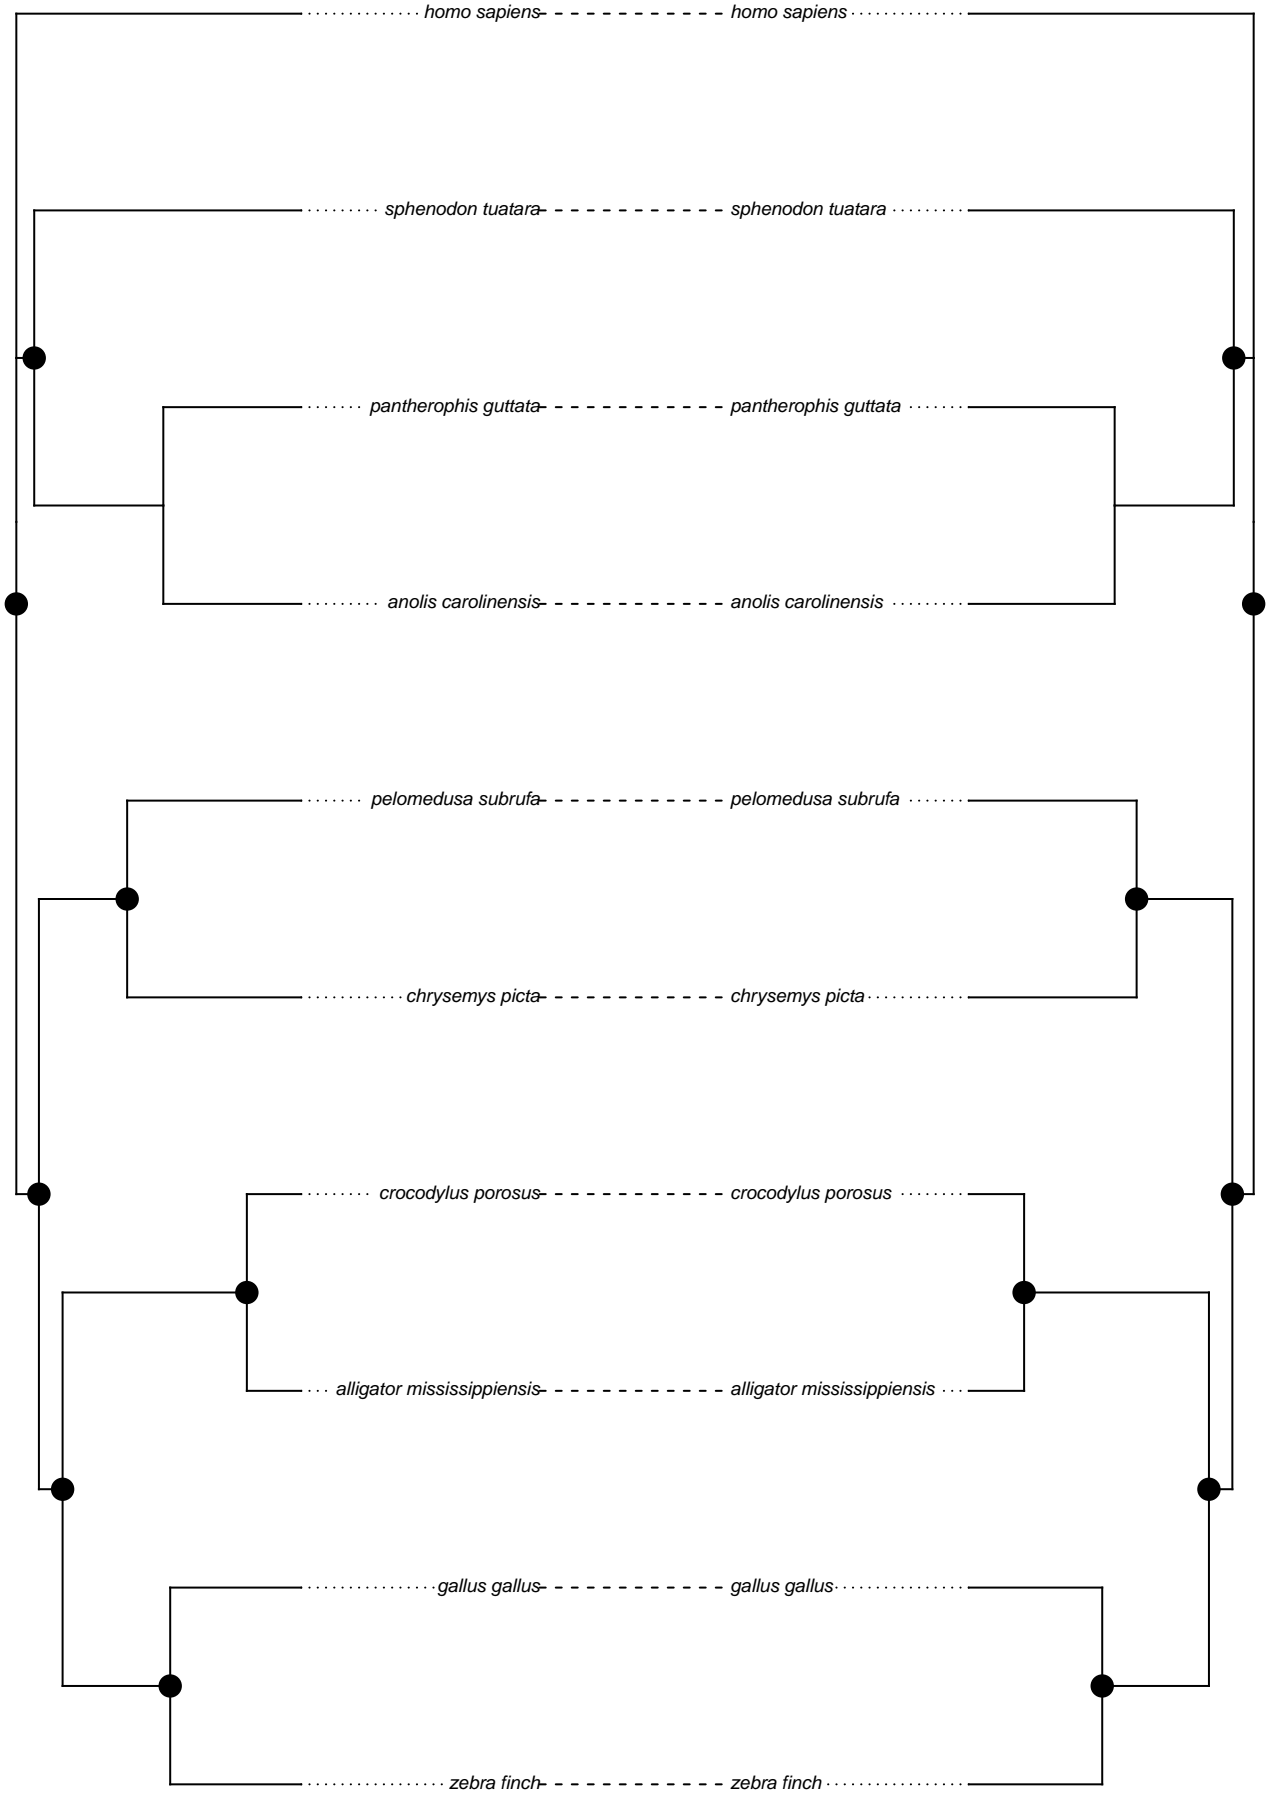

SWSC-EN vs UCE (Crawford\_2012)

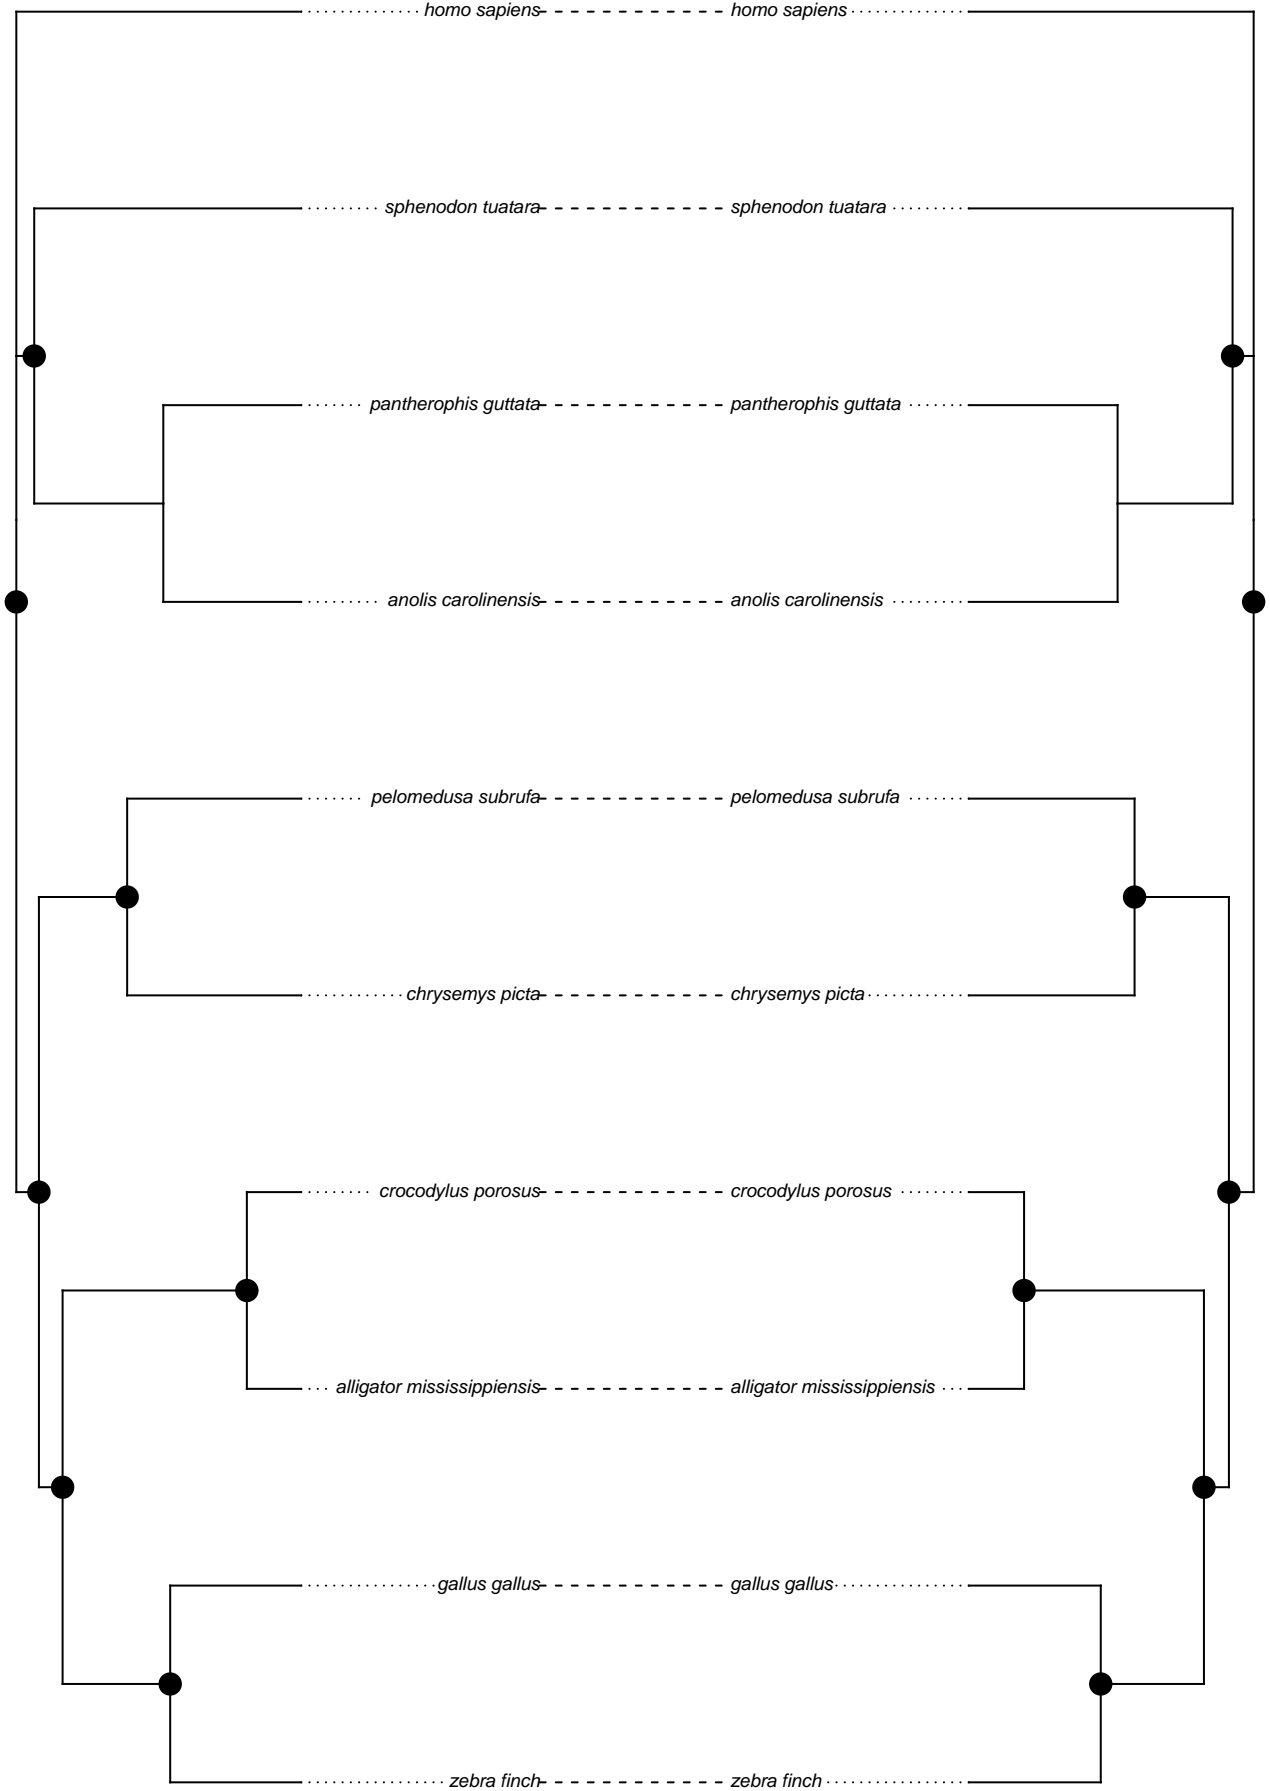

SWSC-EN vs Single (Crawford\_2012)

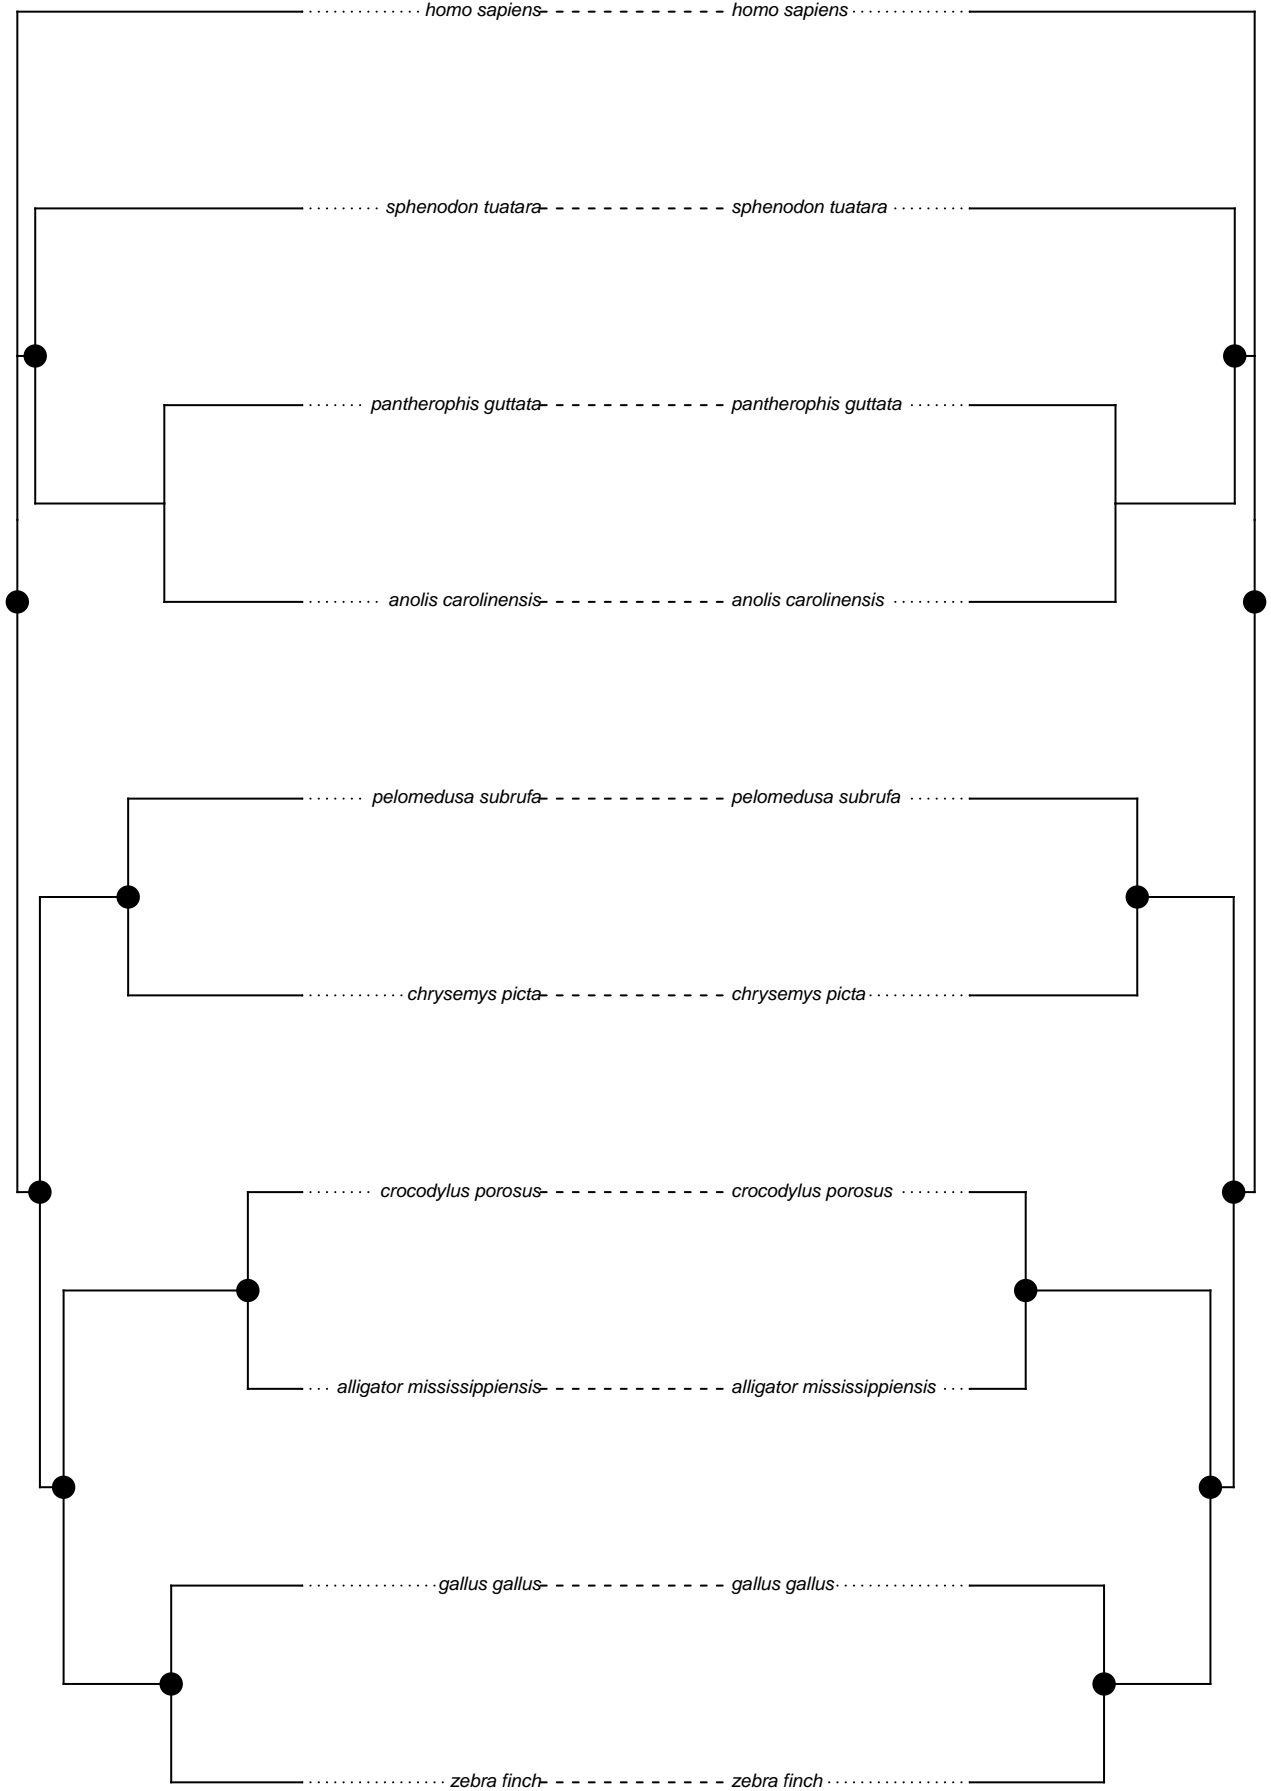

SWSC-EN vs SWSC-GC (Harrington\_2016)

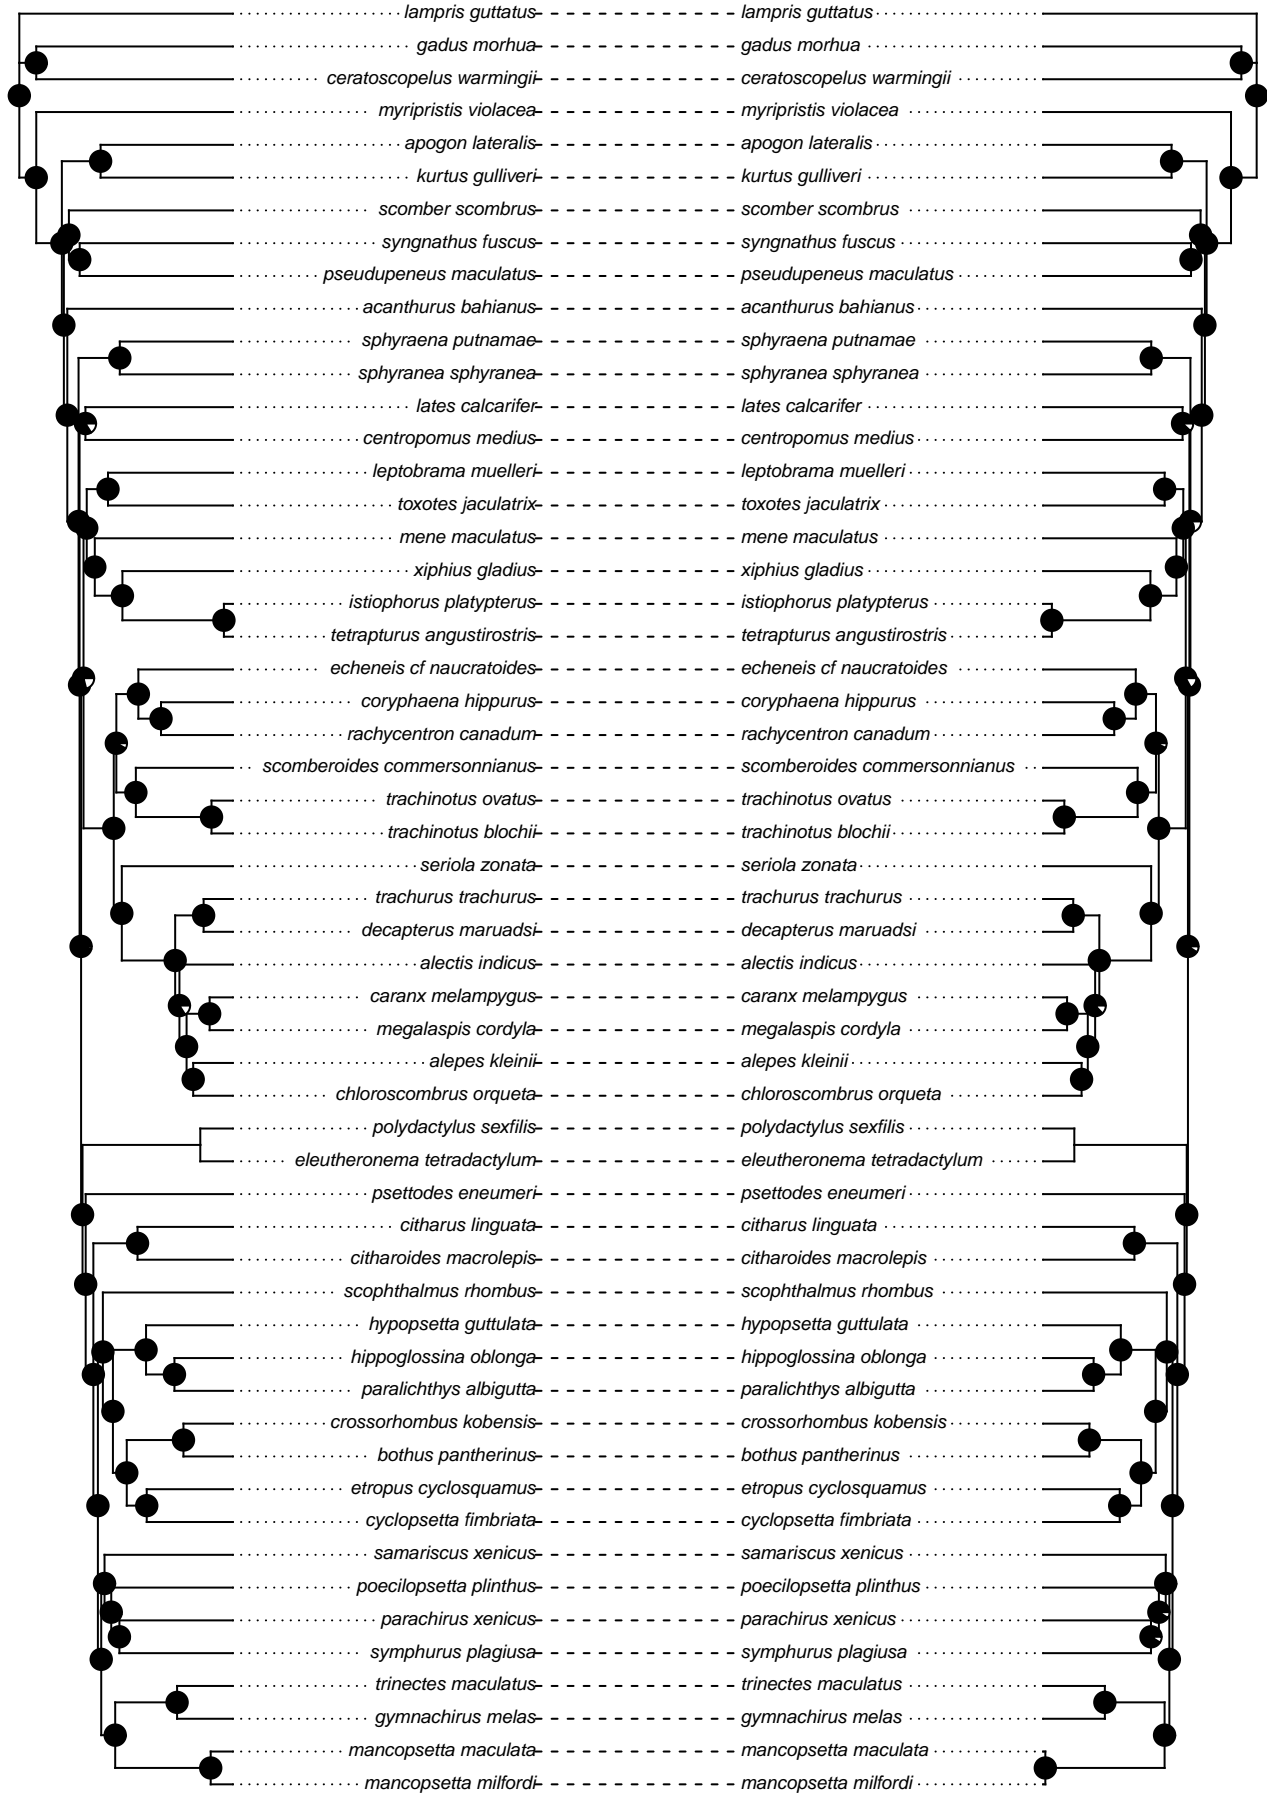

SWSC-EN vs SWSC-MU (Harrington\_2016)

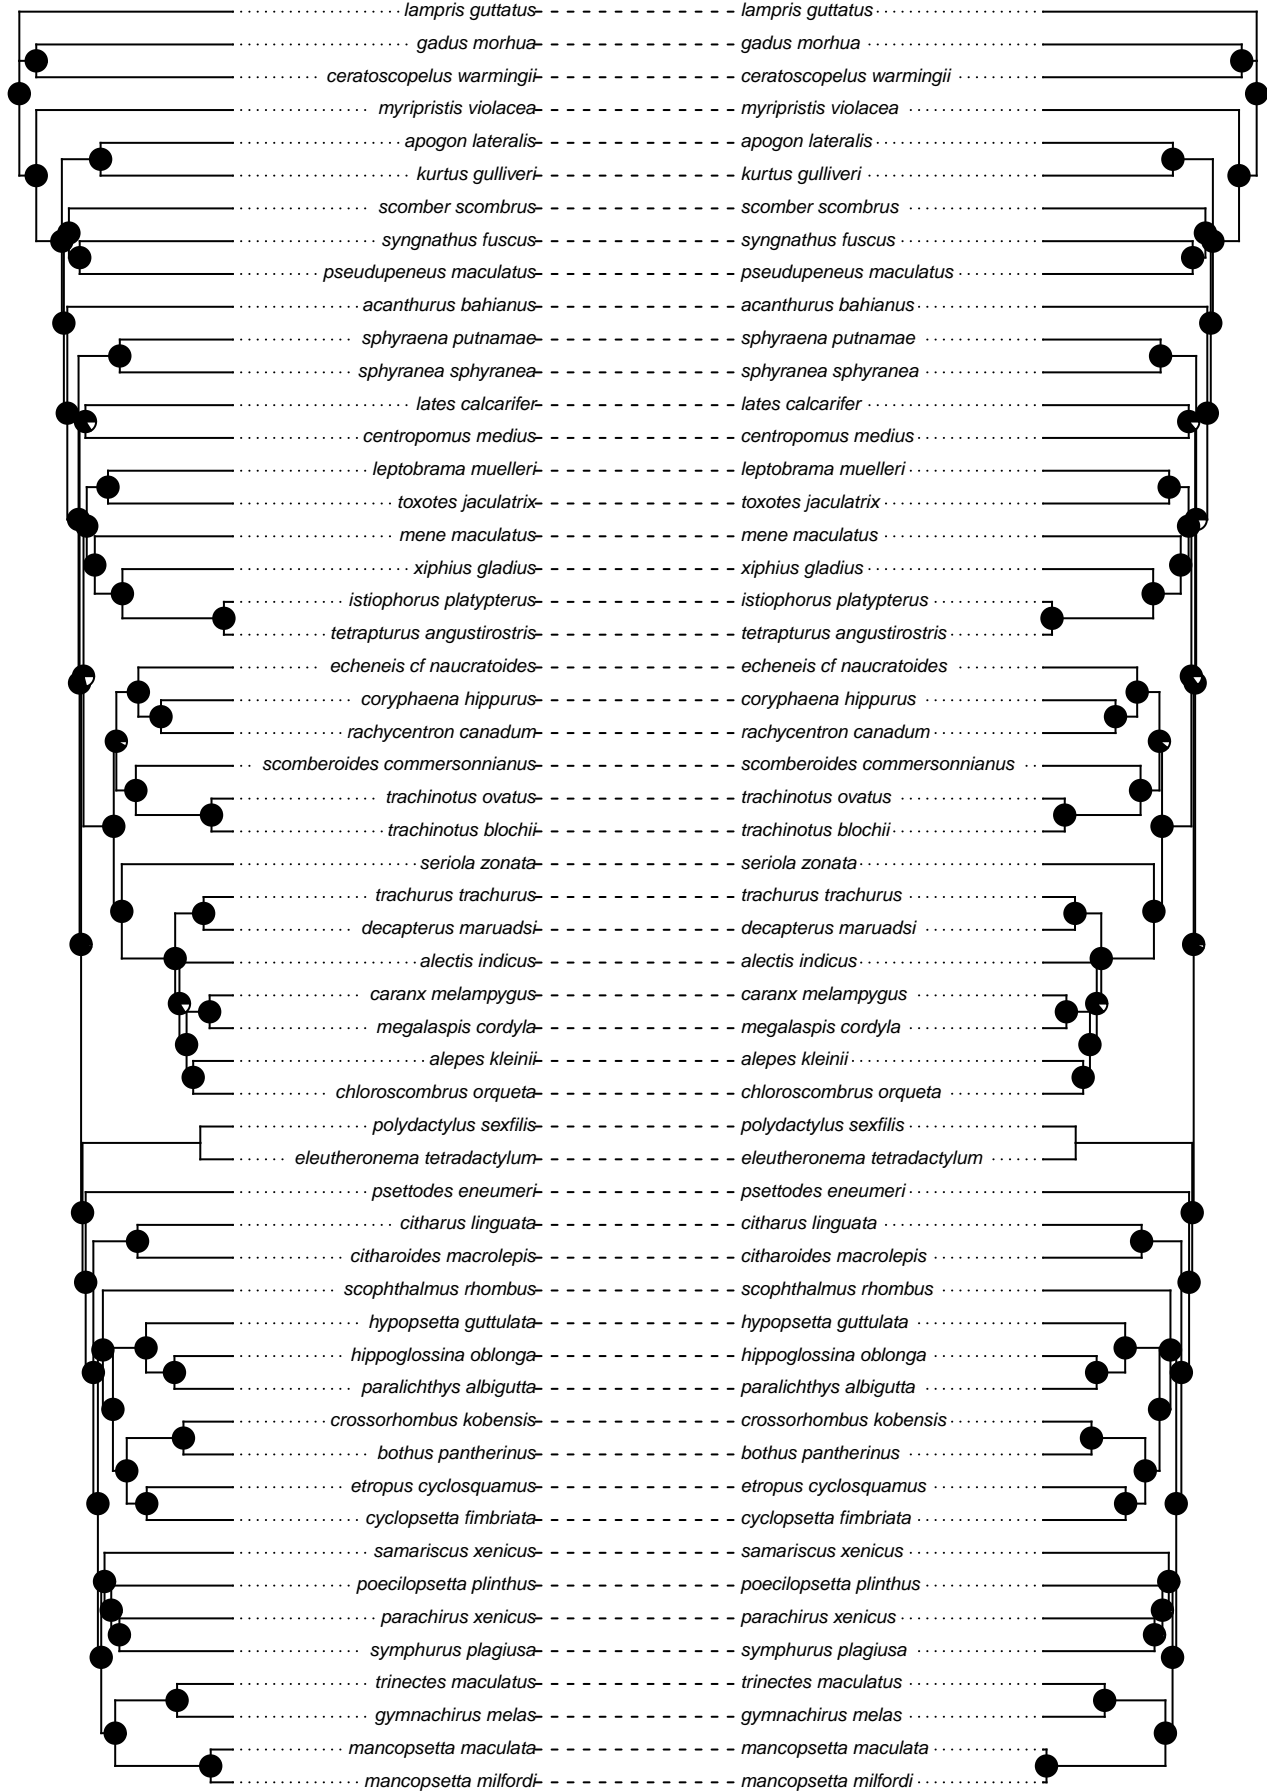



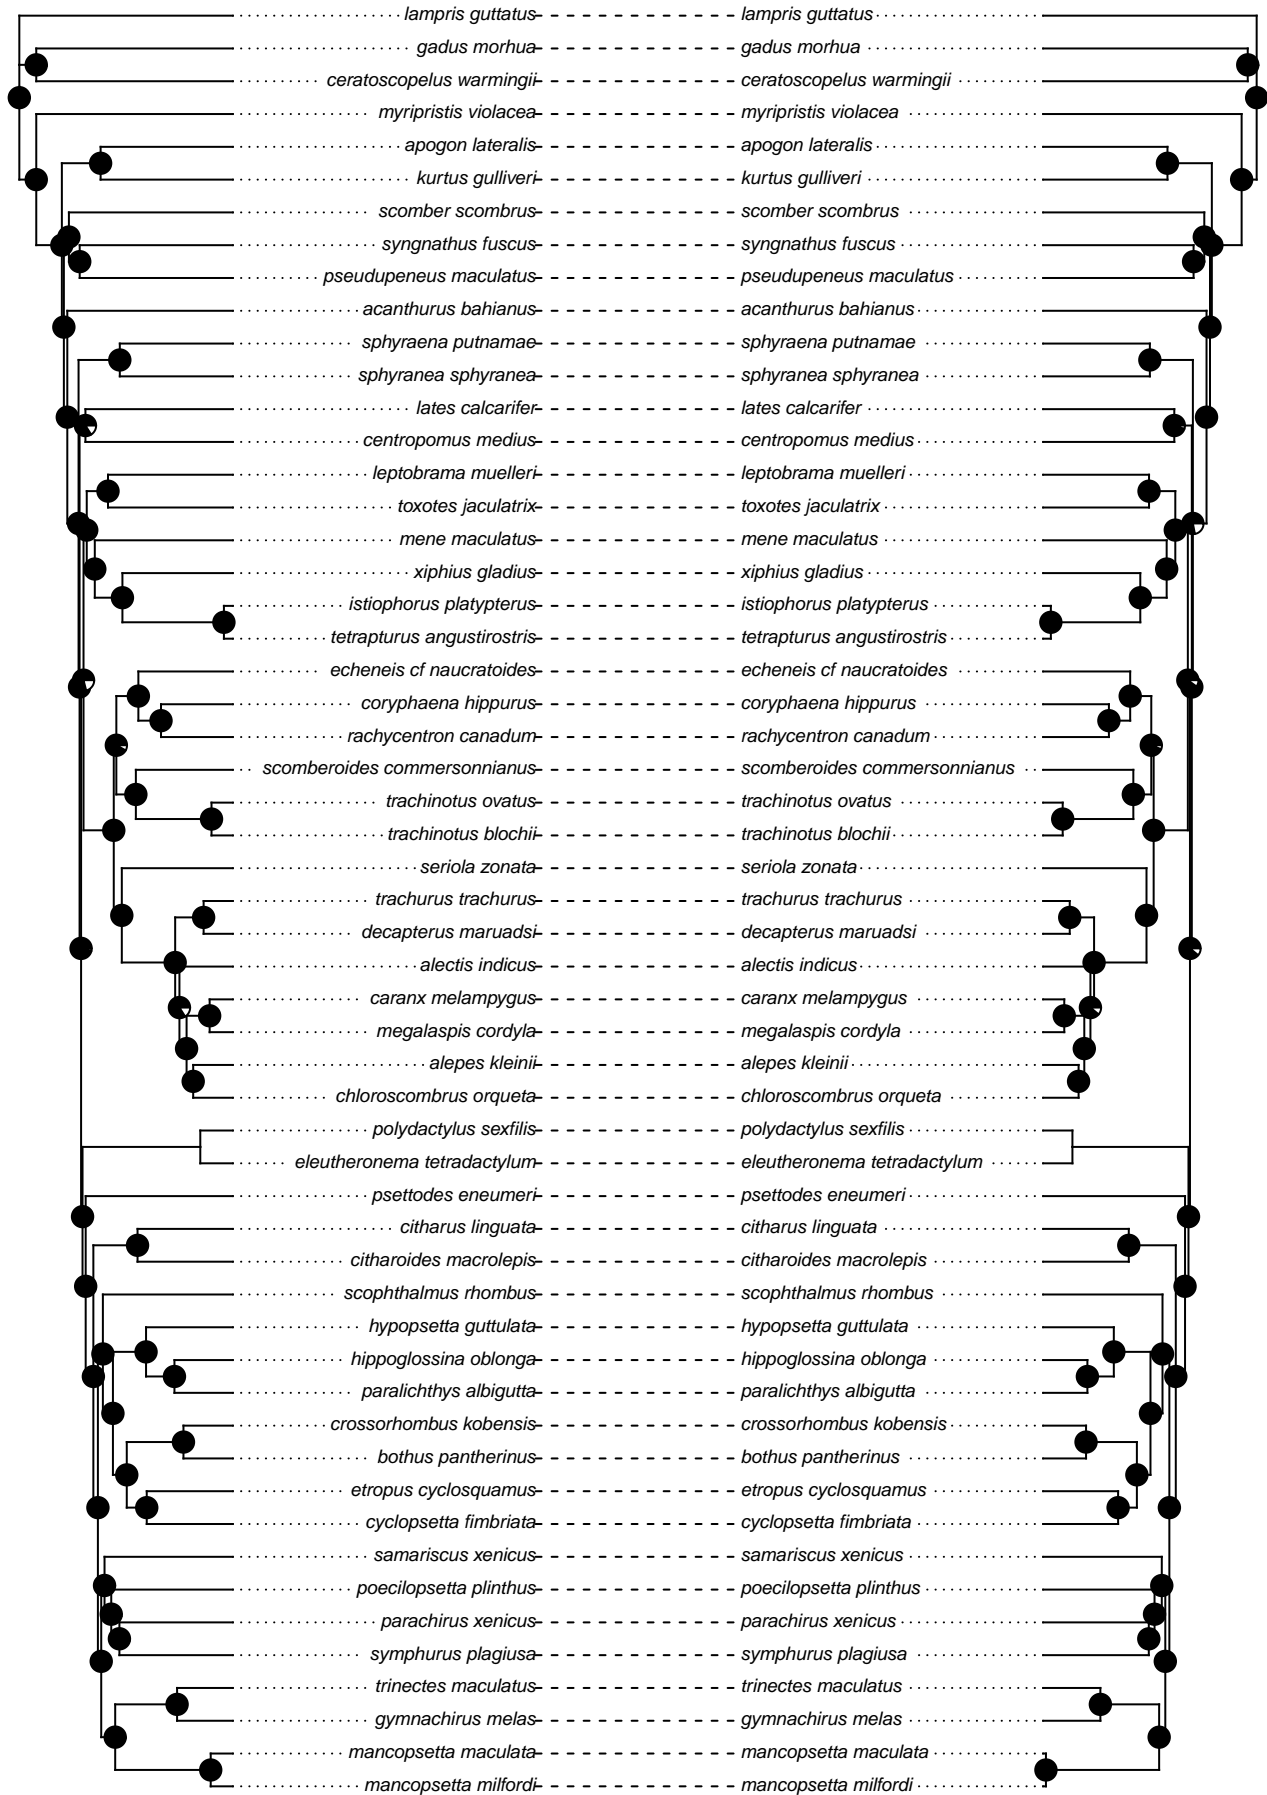

SWSC-EN vs PF-UCE (Harrington\_2016)

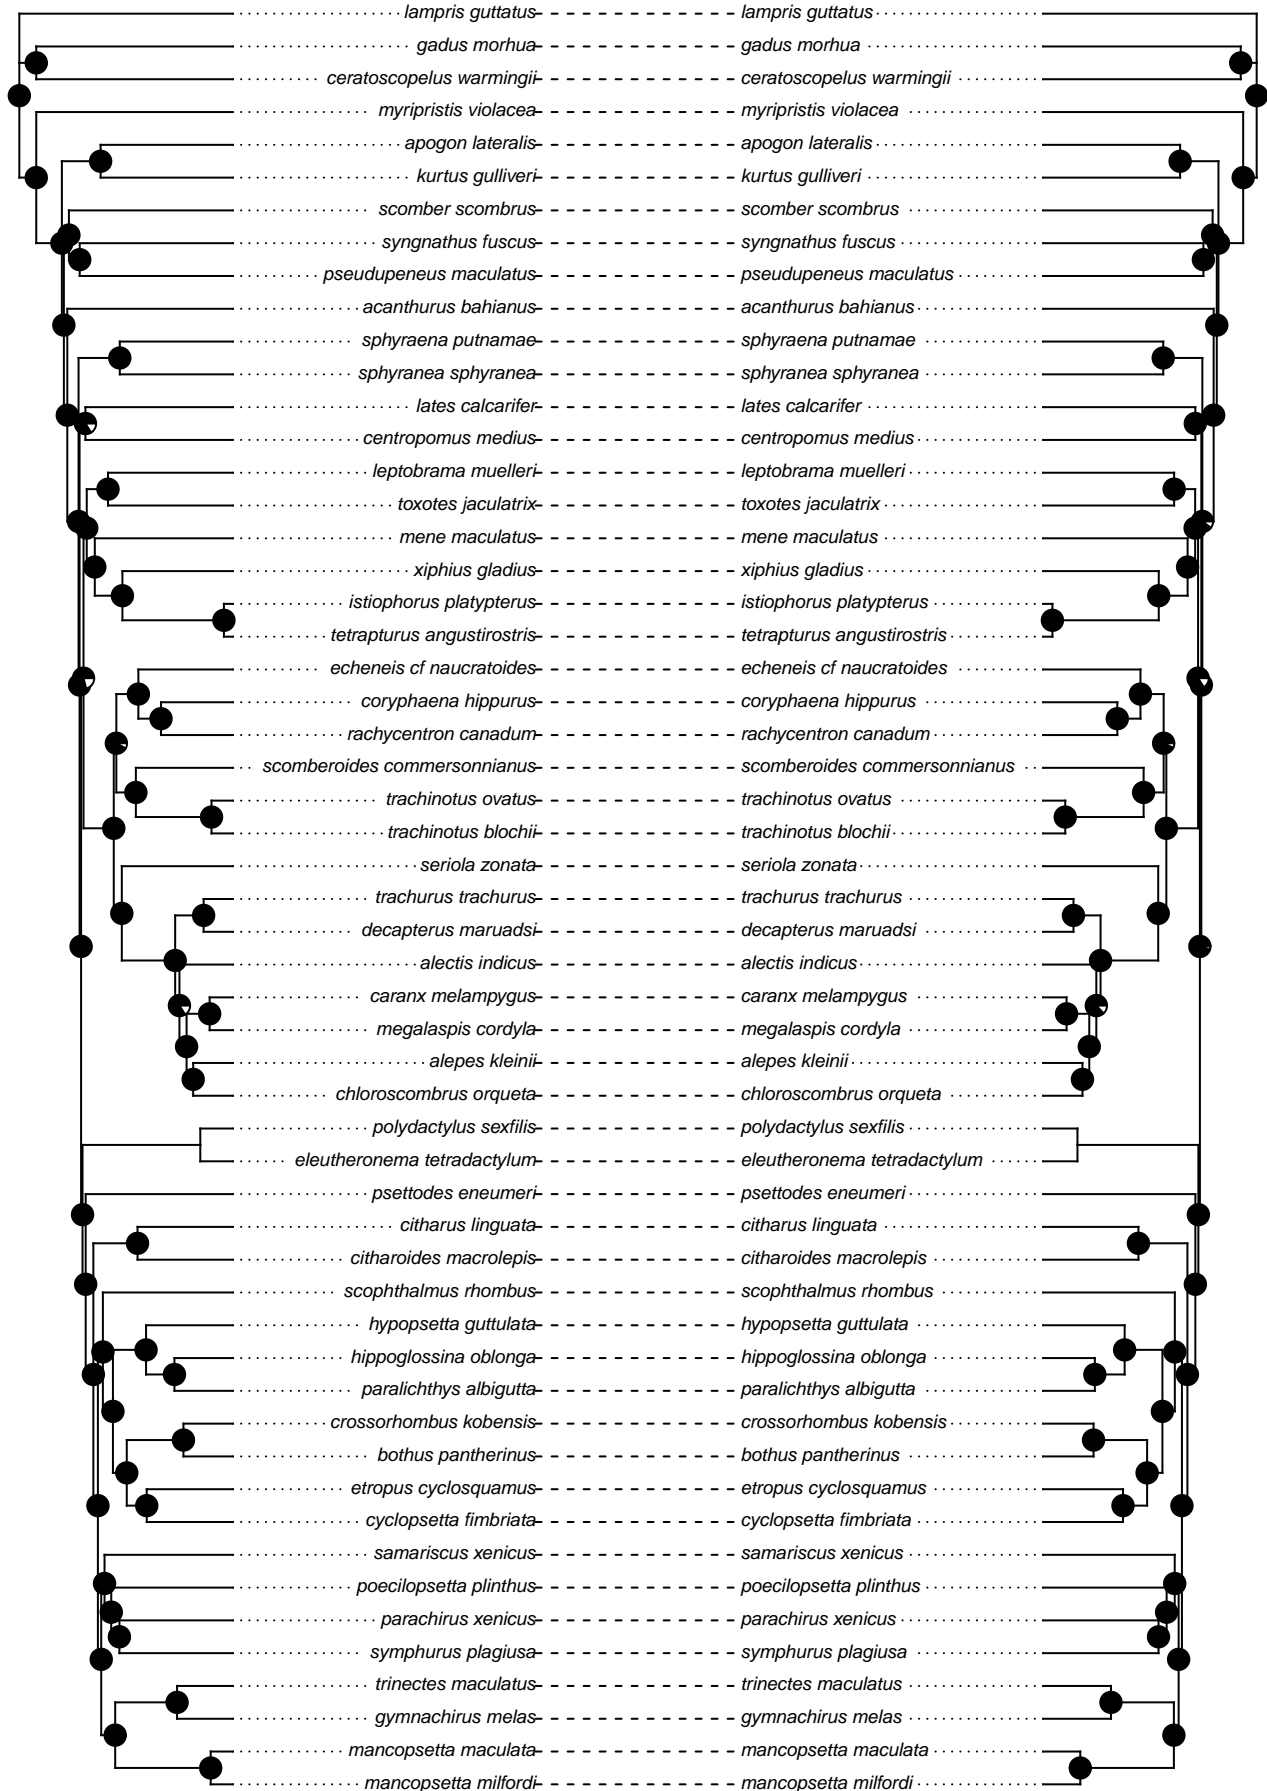

SWSC-EN vs UCE (Harrington\_2016)

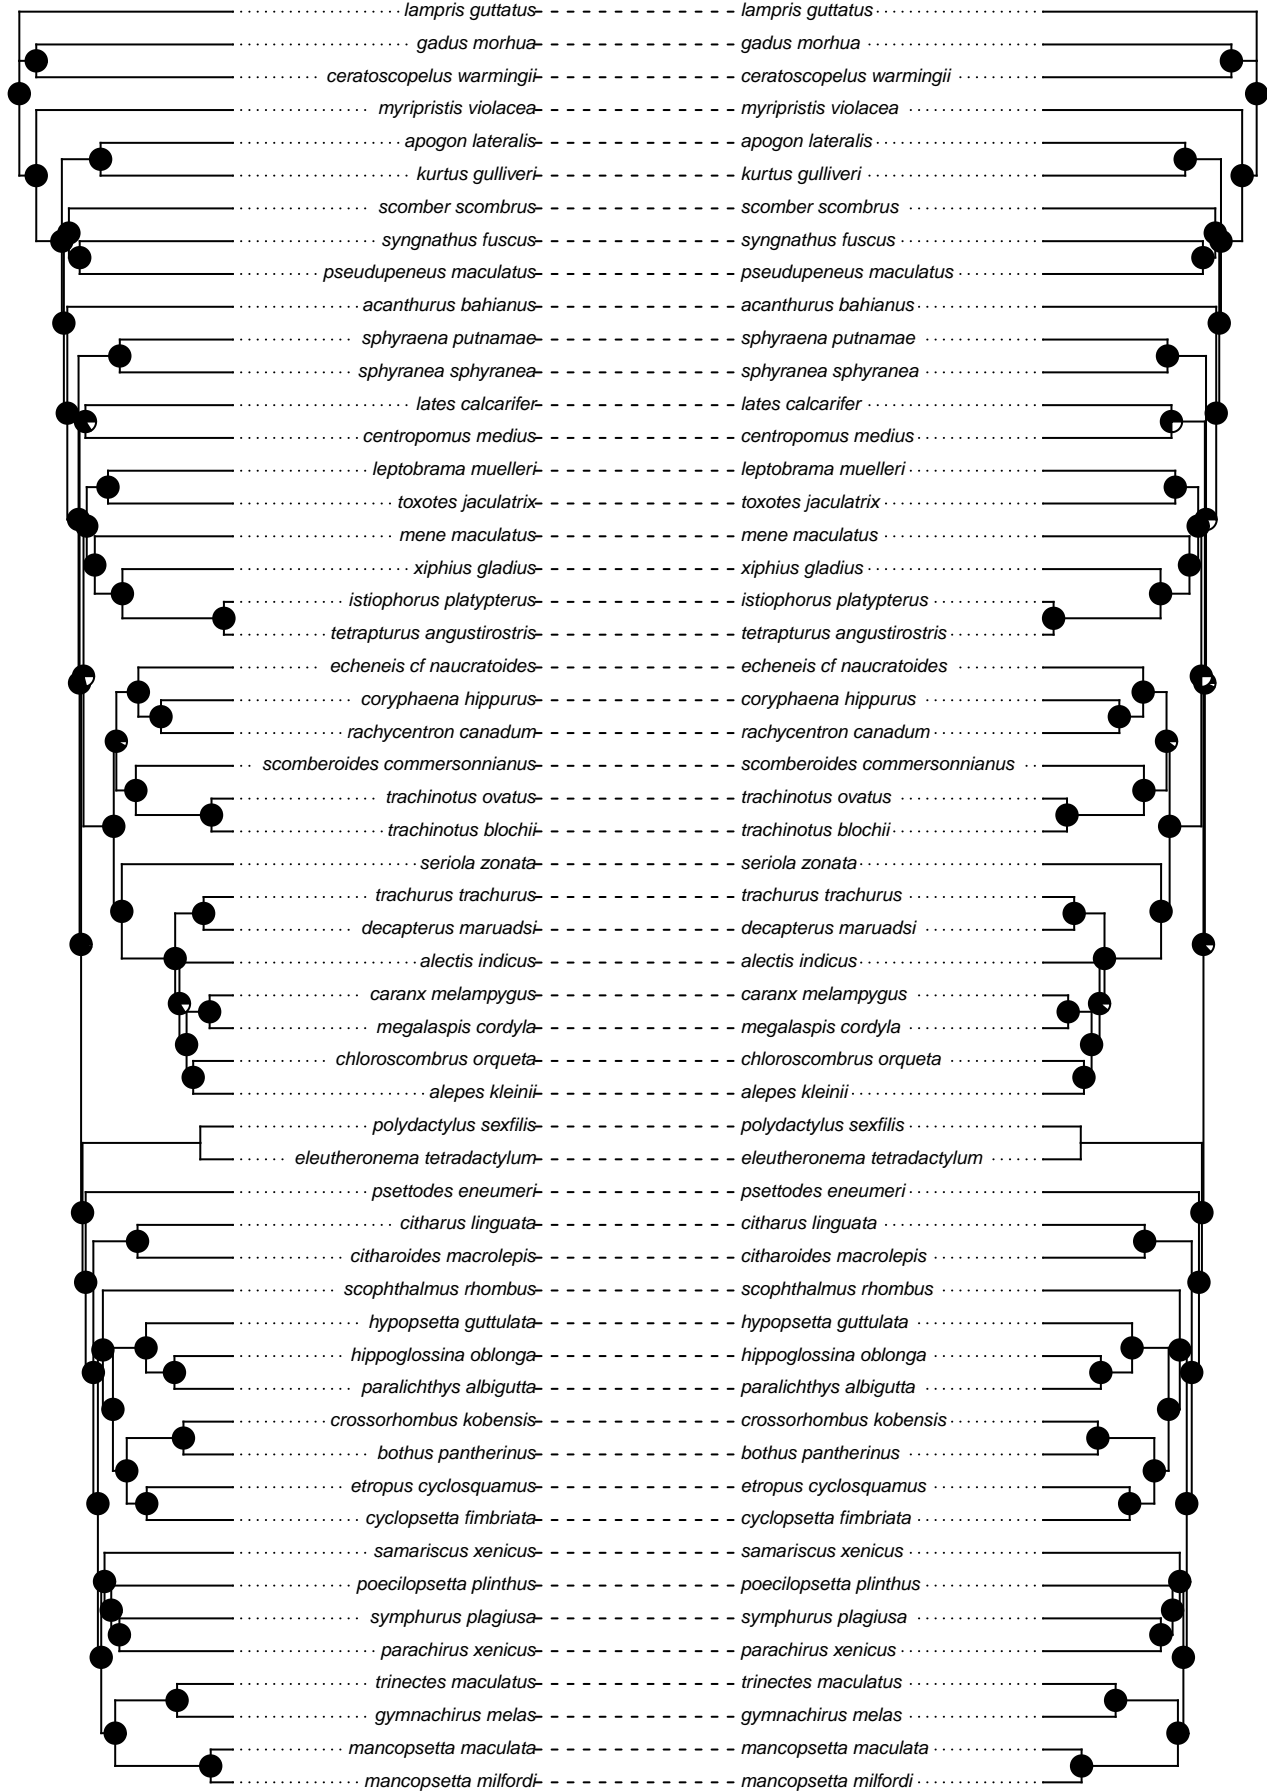

SWSC-EN vs Single (Harrington\_2016)

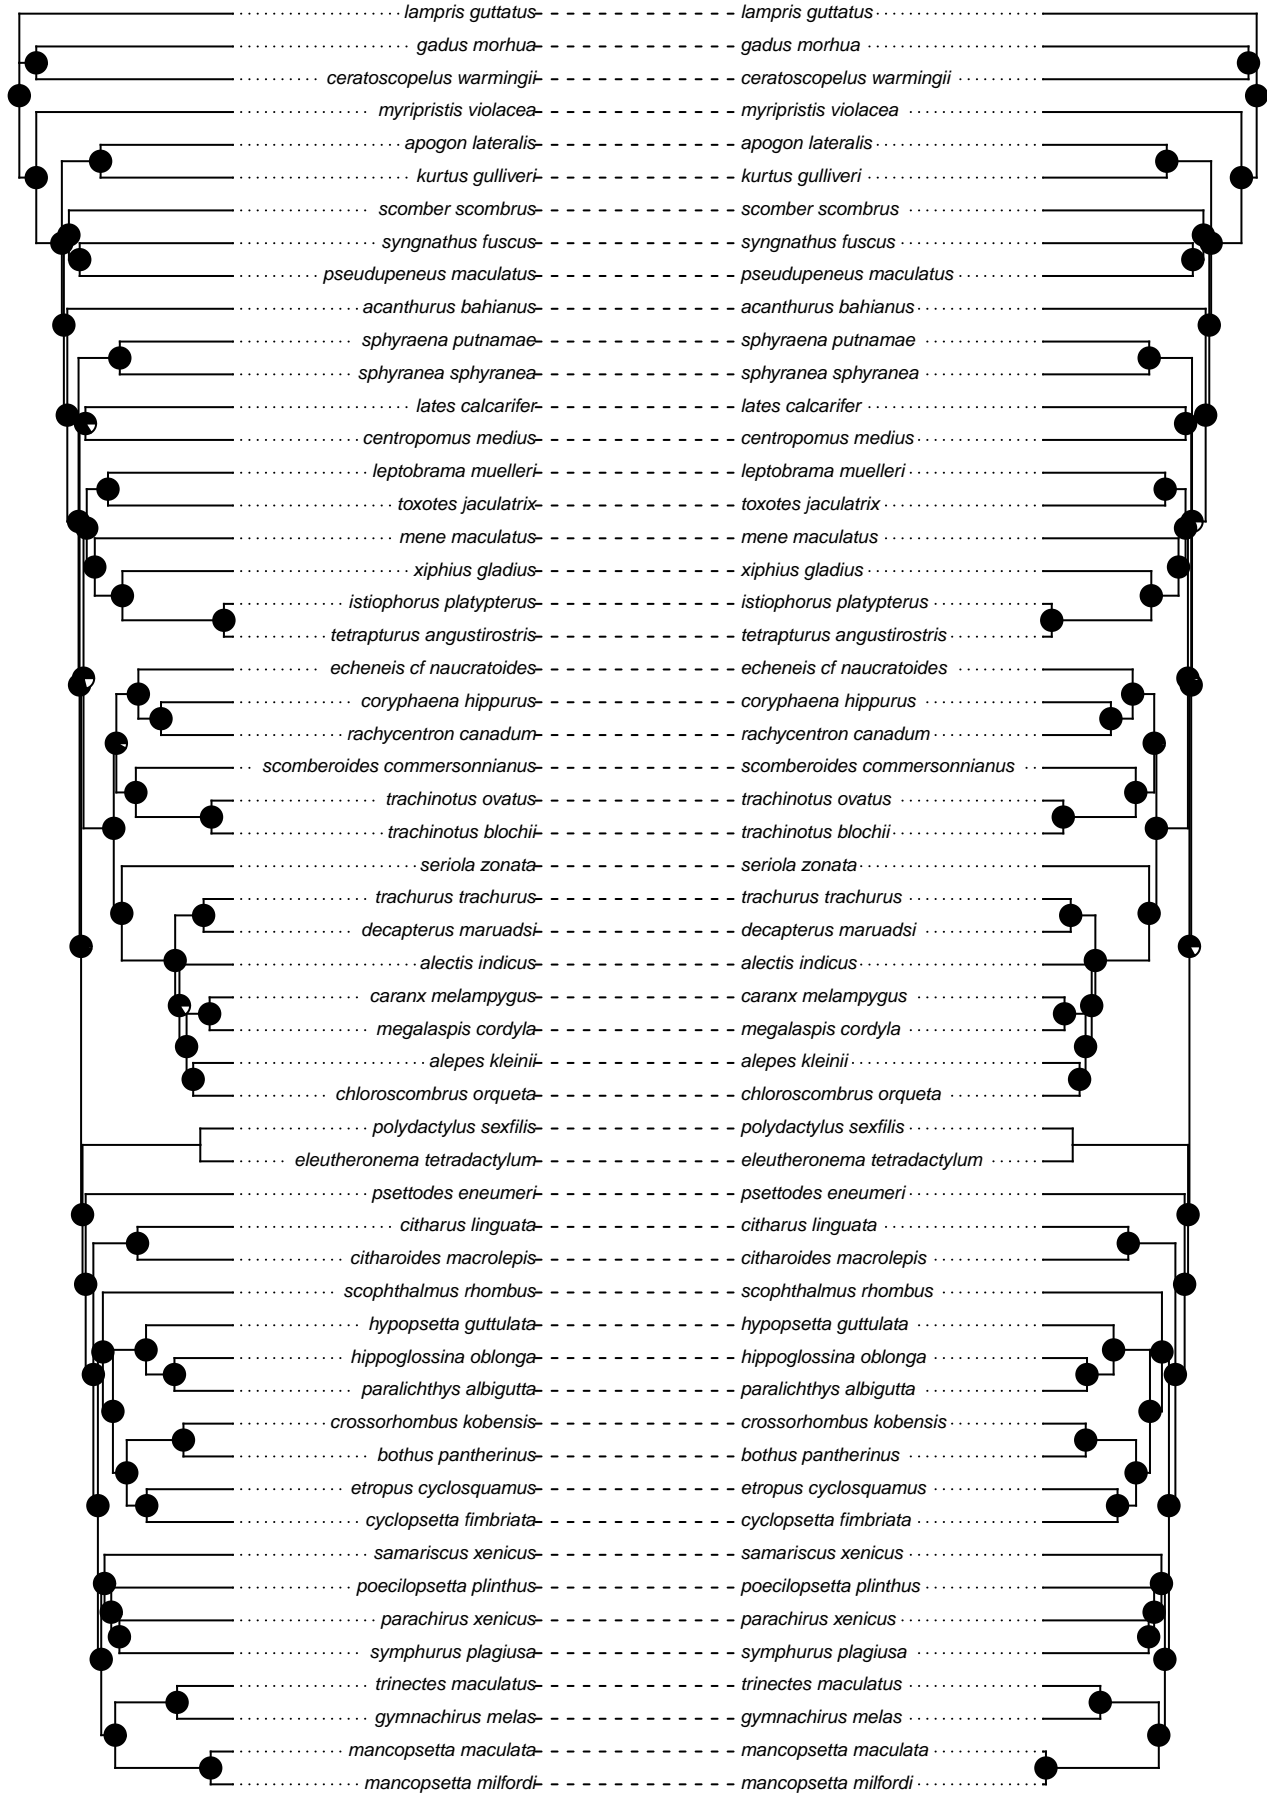

SWSC-EN vs SWSC-GC (McCormack\_2013)

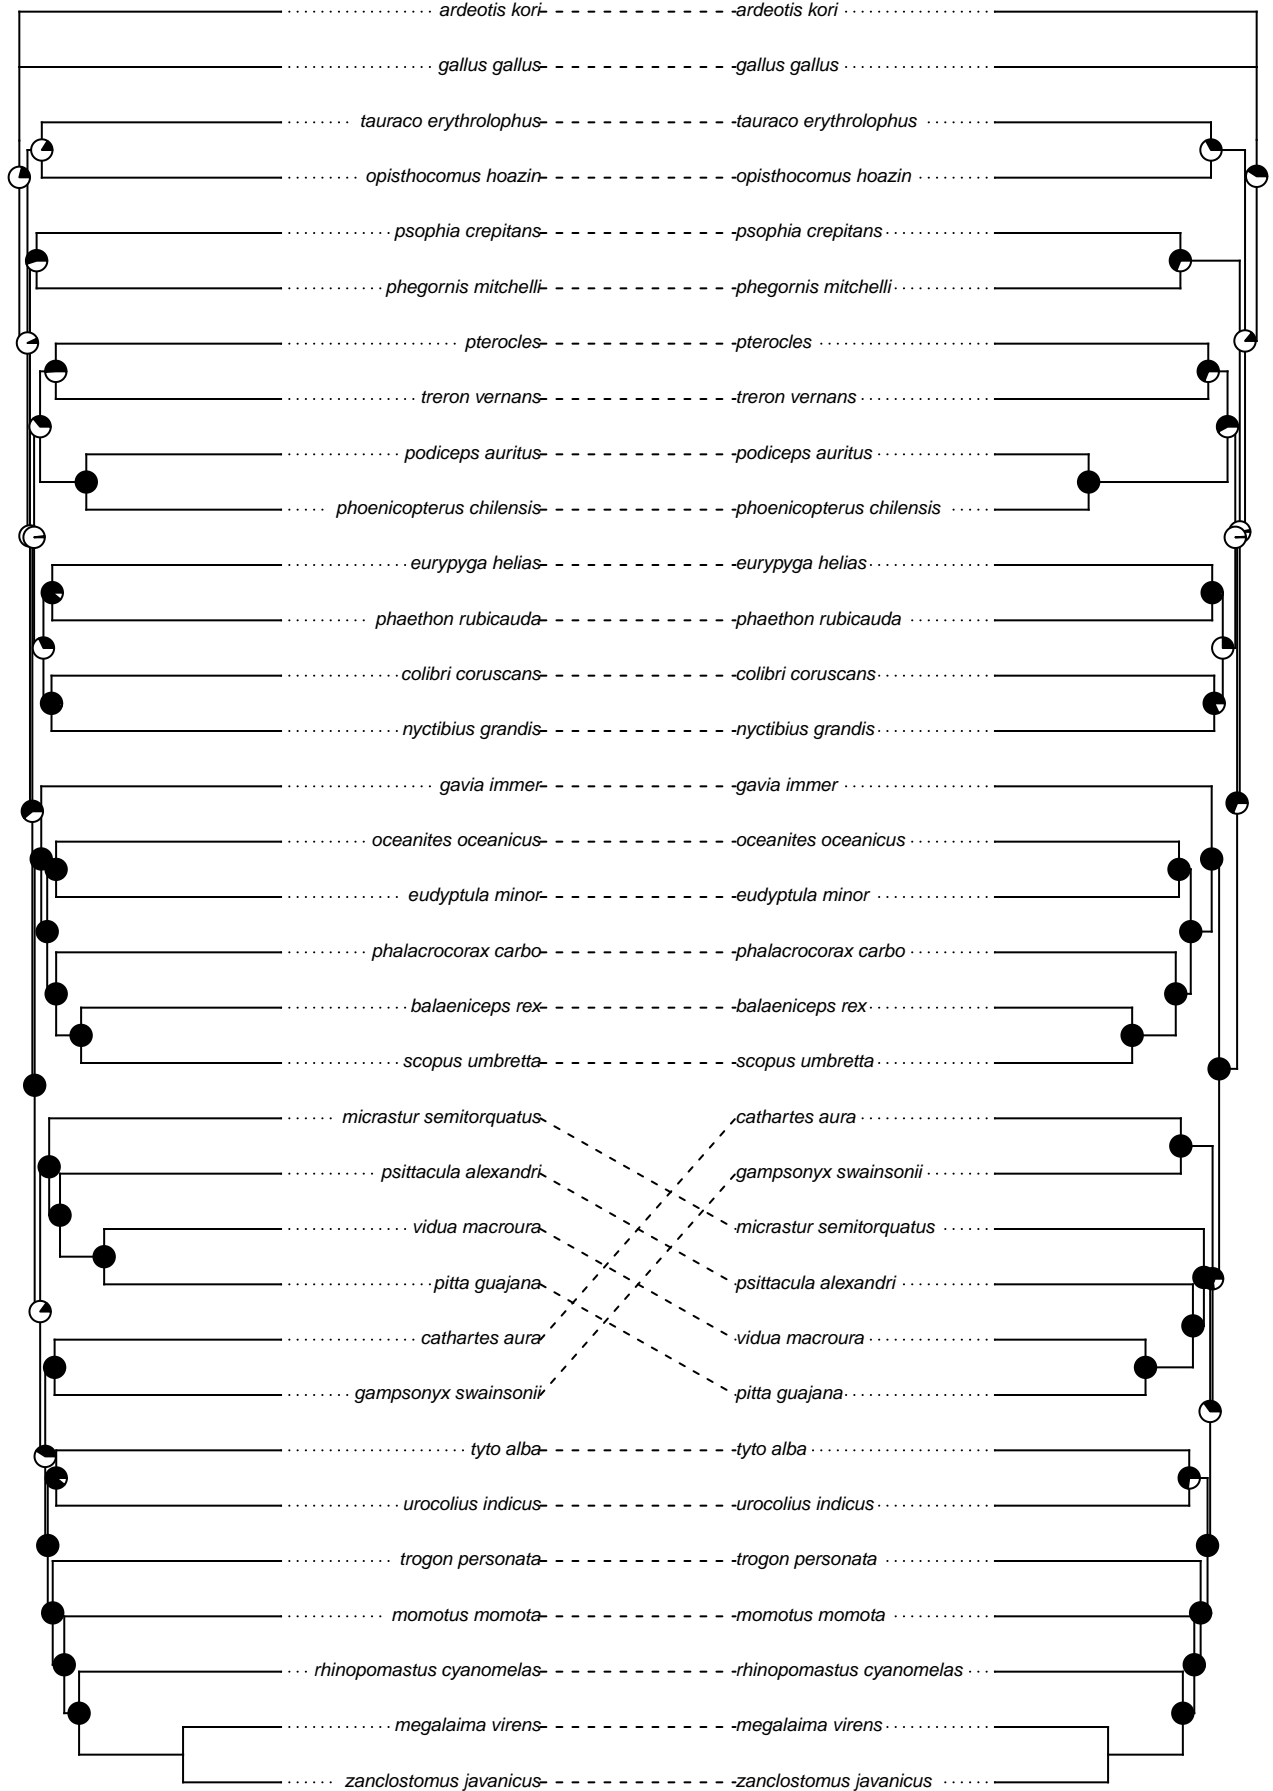

SWSC-EN vs SWSC-MU (McCormack\_2013)

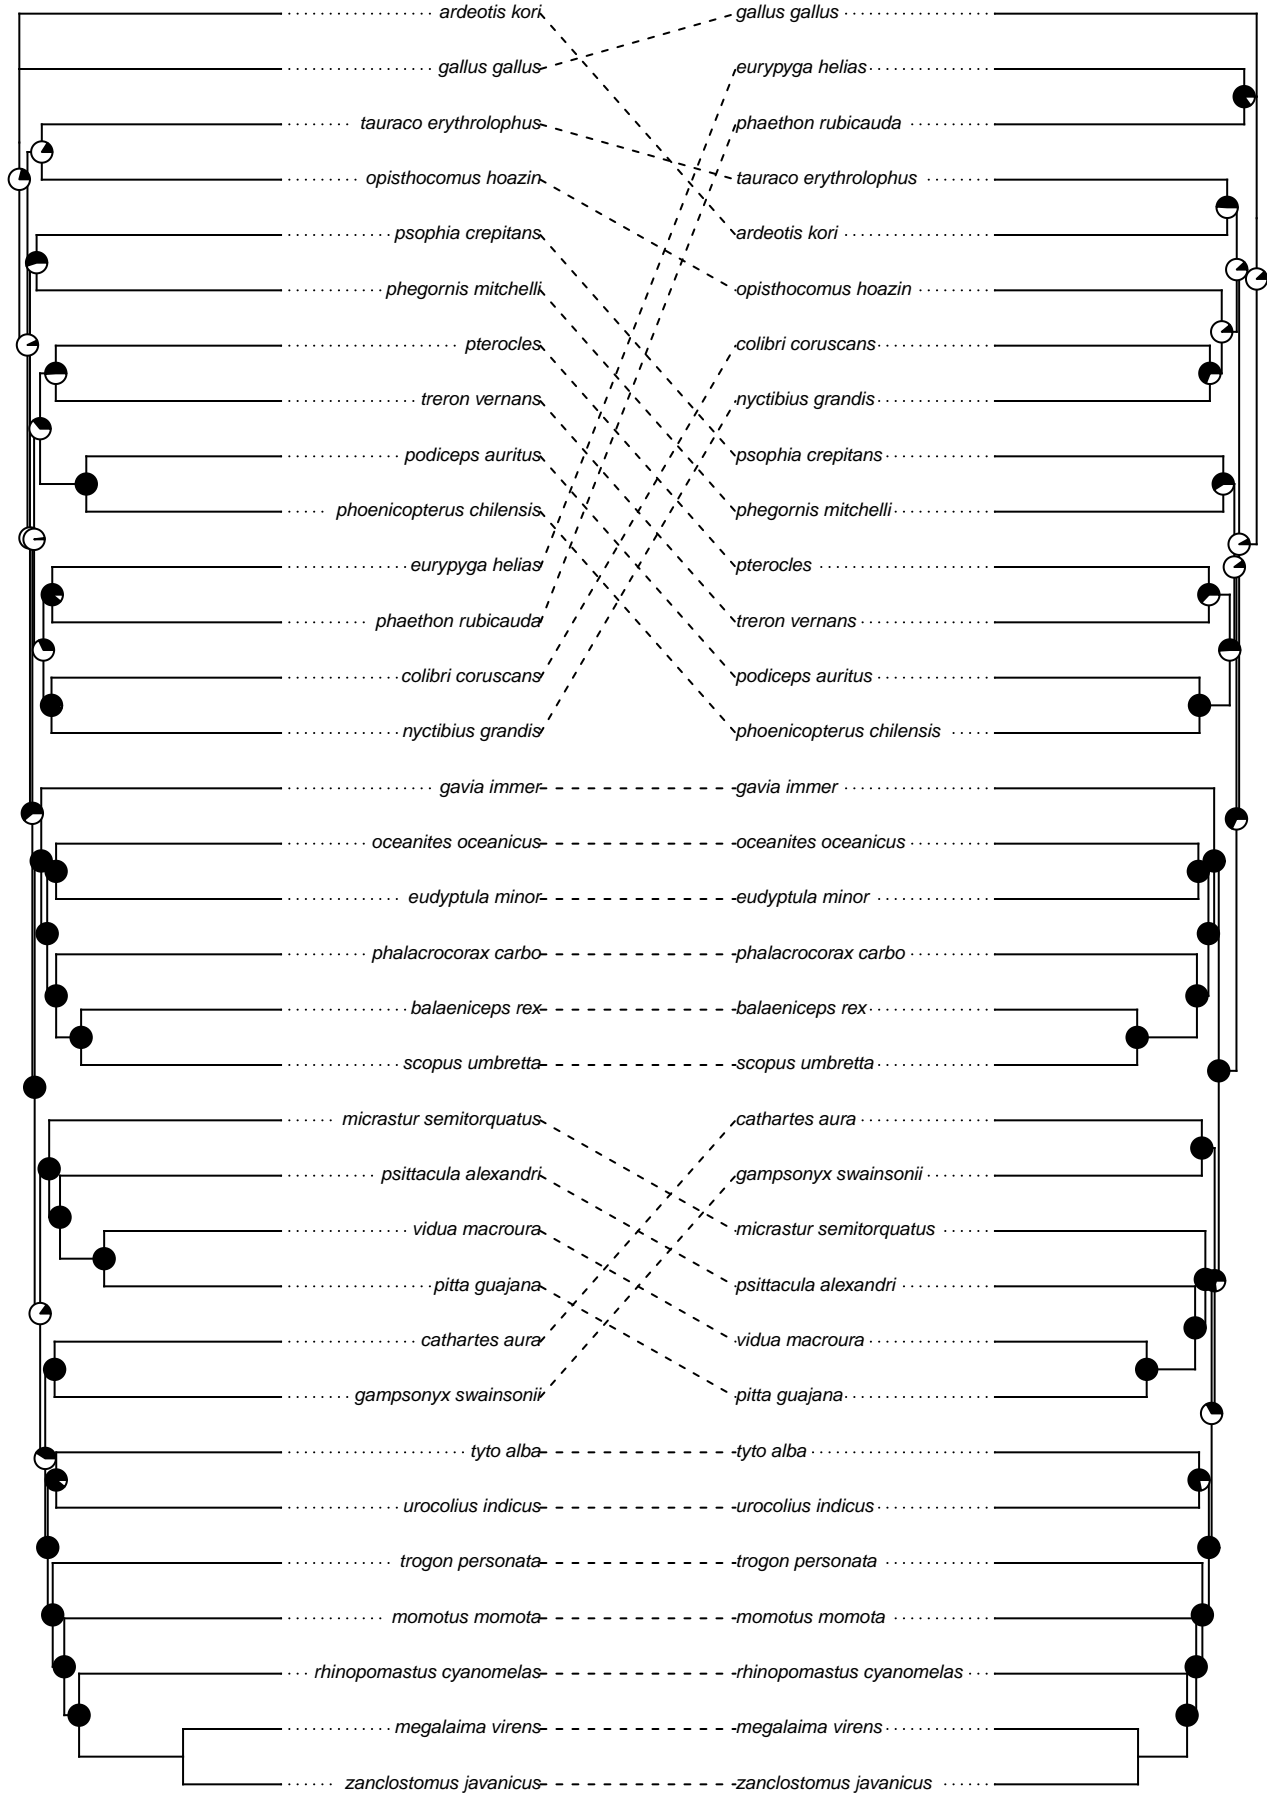

SWSC-EN vs UCESP (McCormack\_2013)

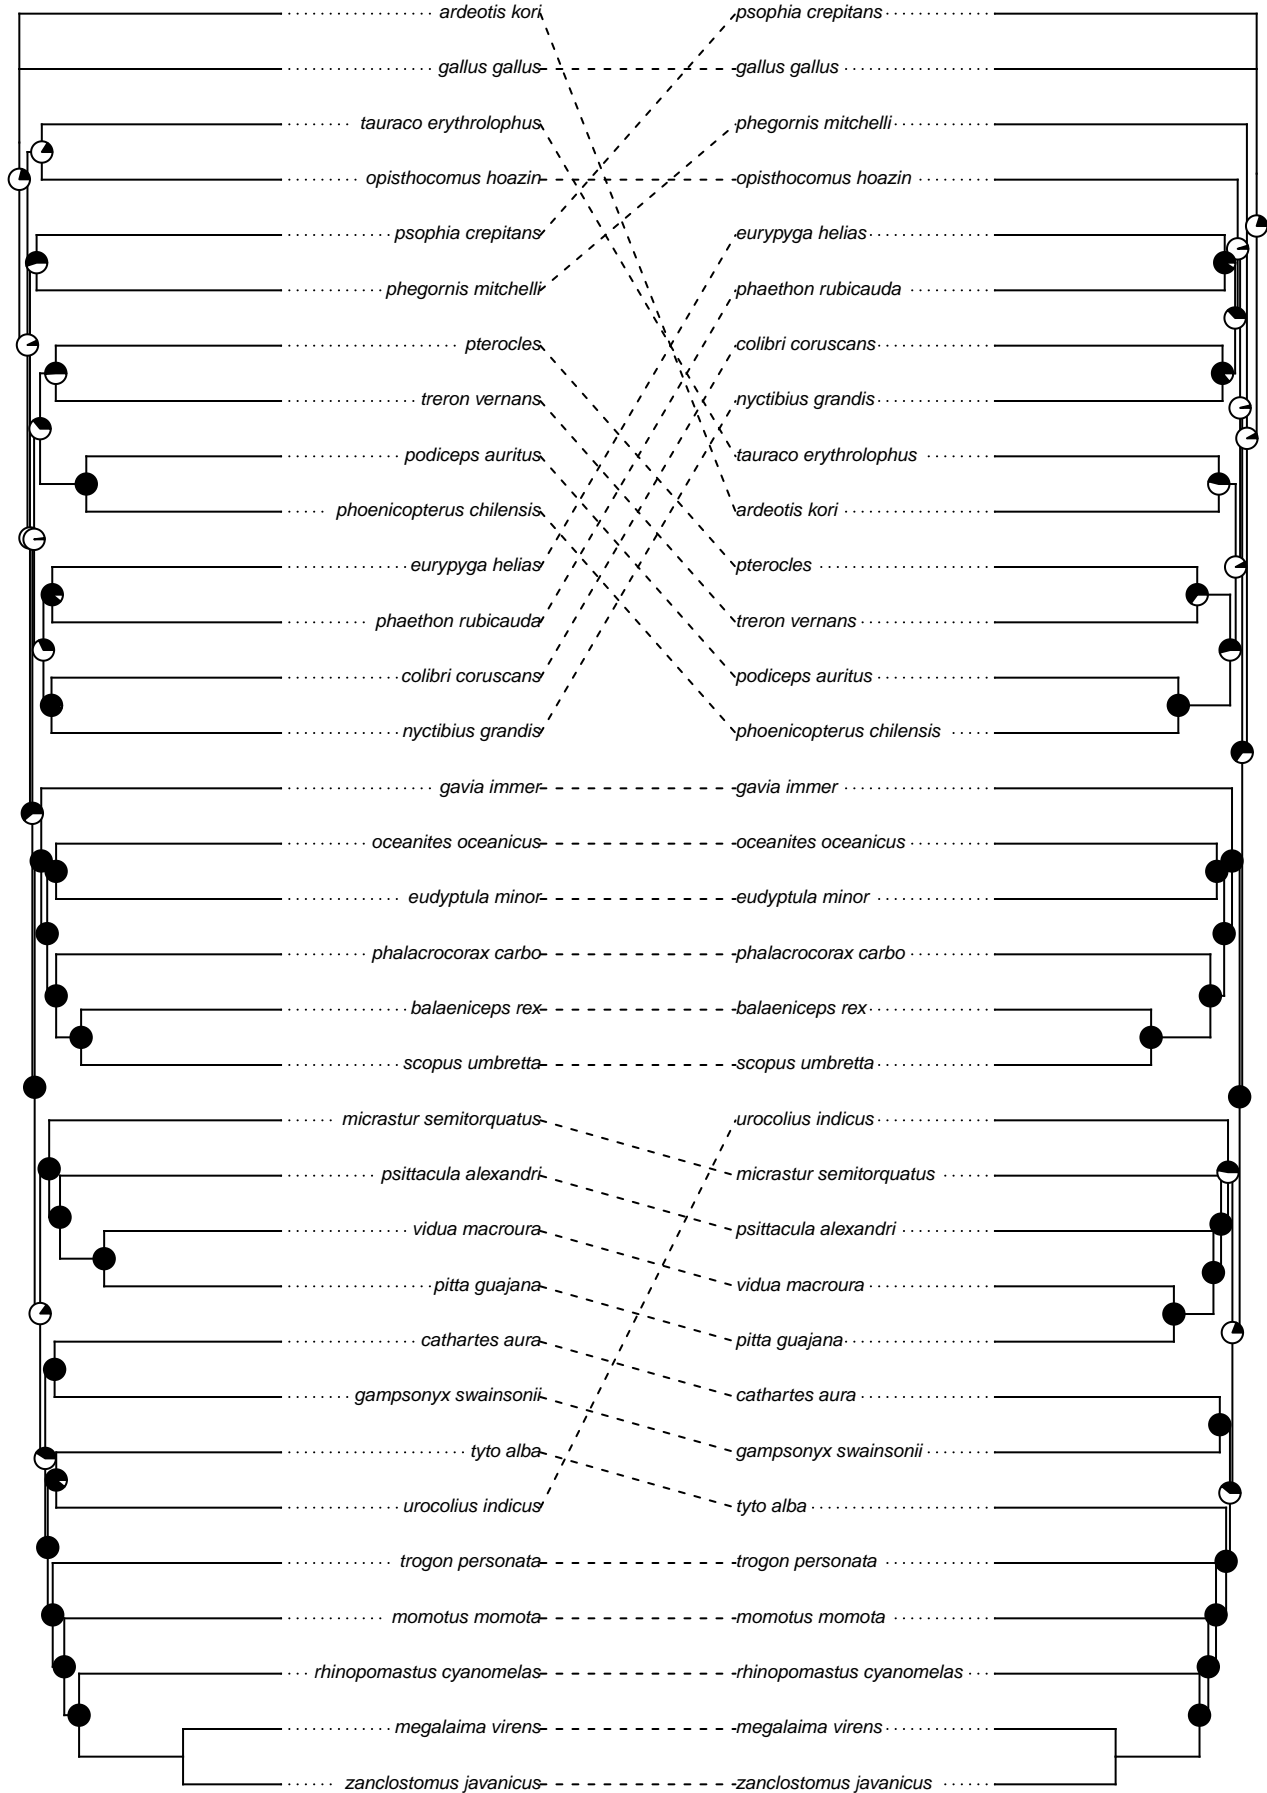

SWSC-EN vs PF-UCE (McCormack\_2013)

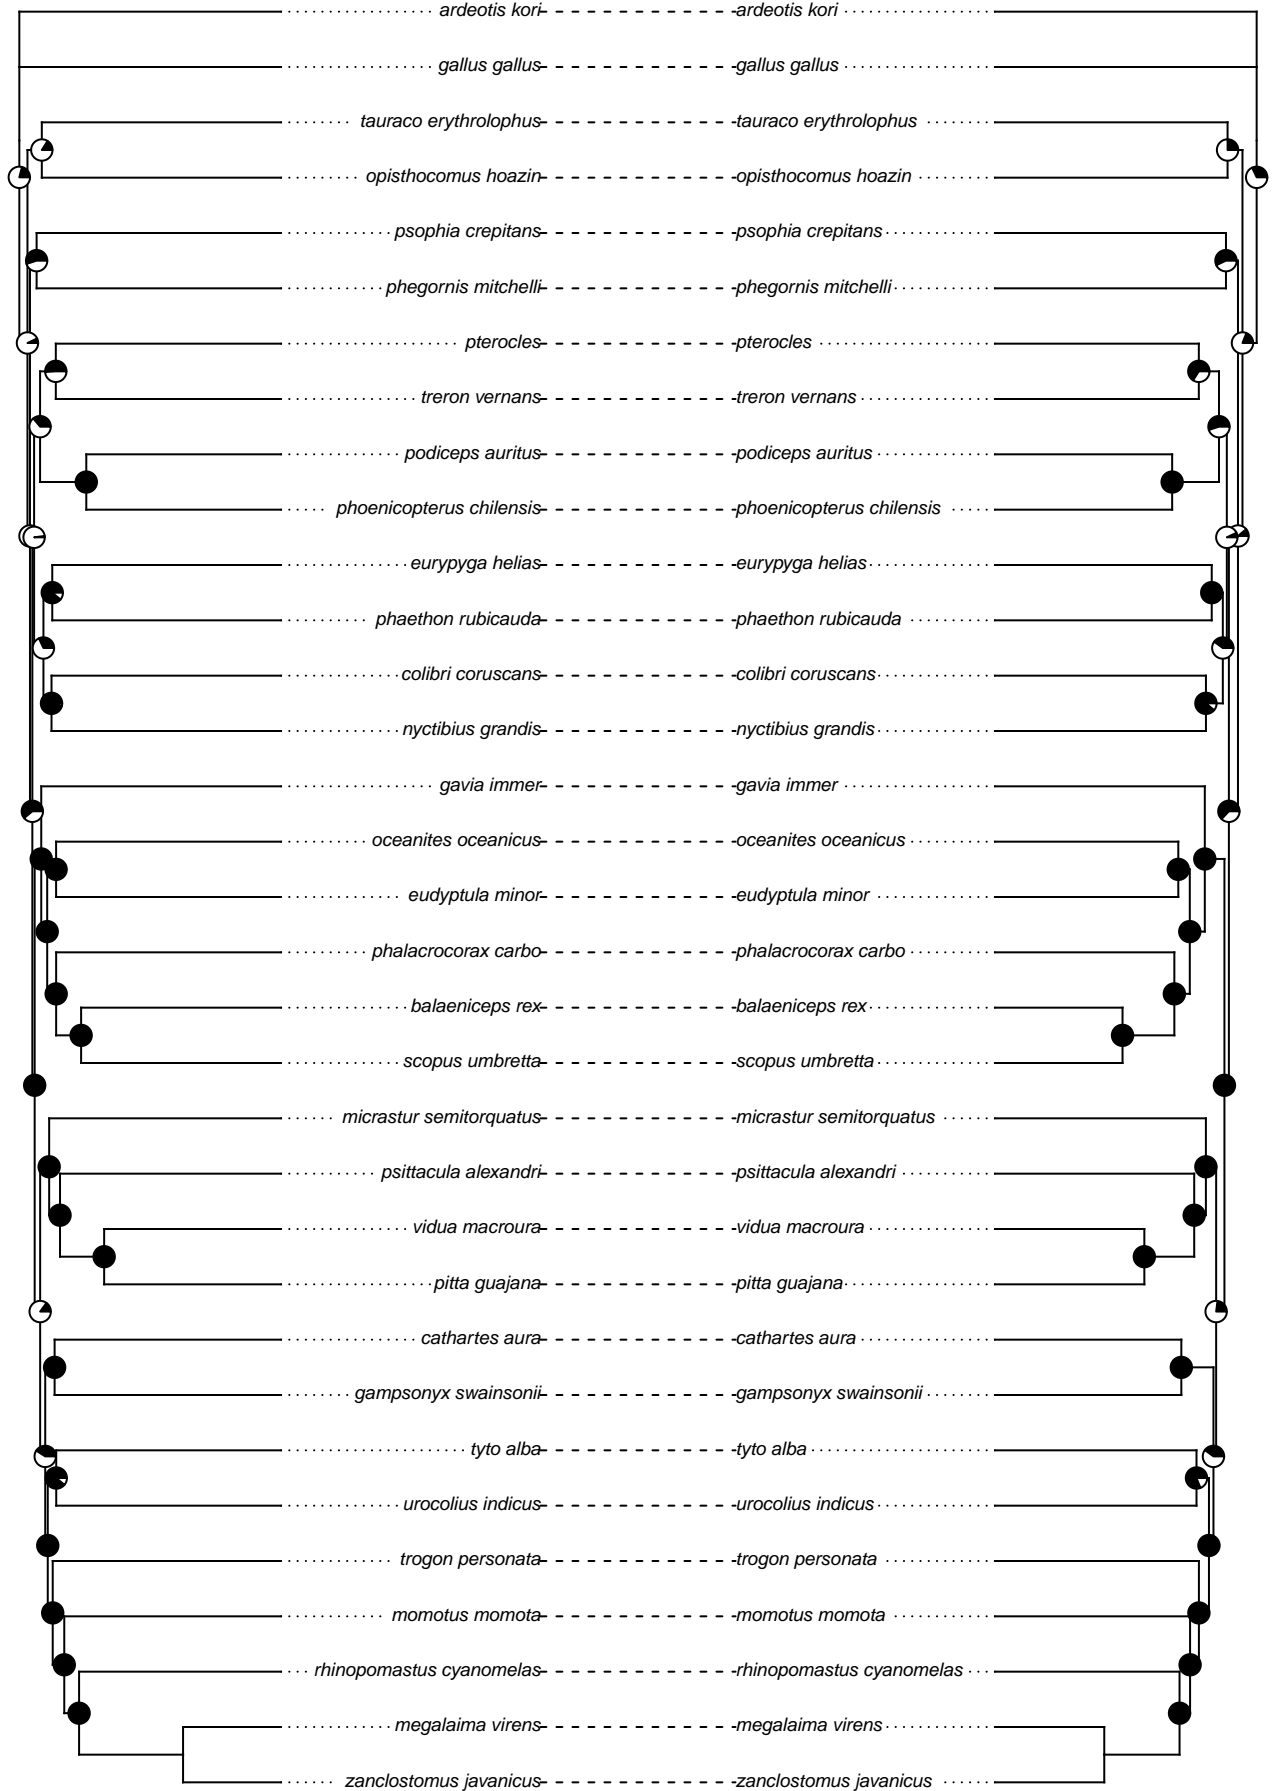



SWSC-EN vs UCE (McCormack\_2013)

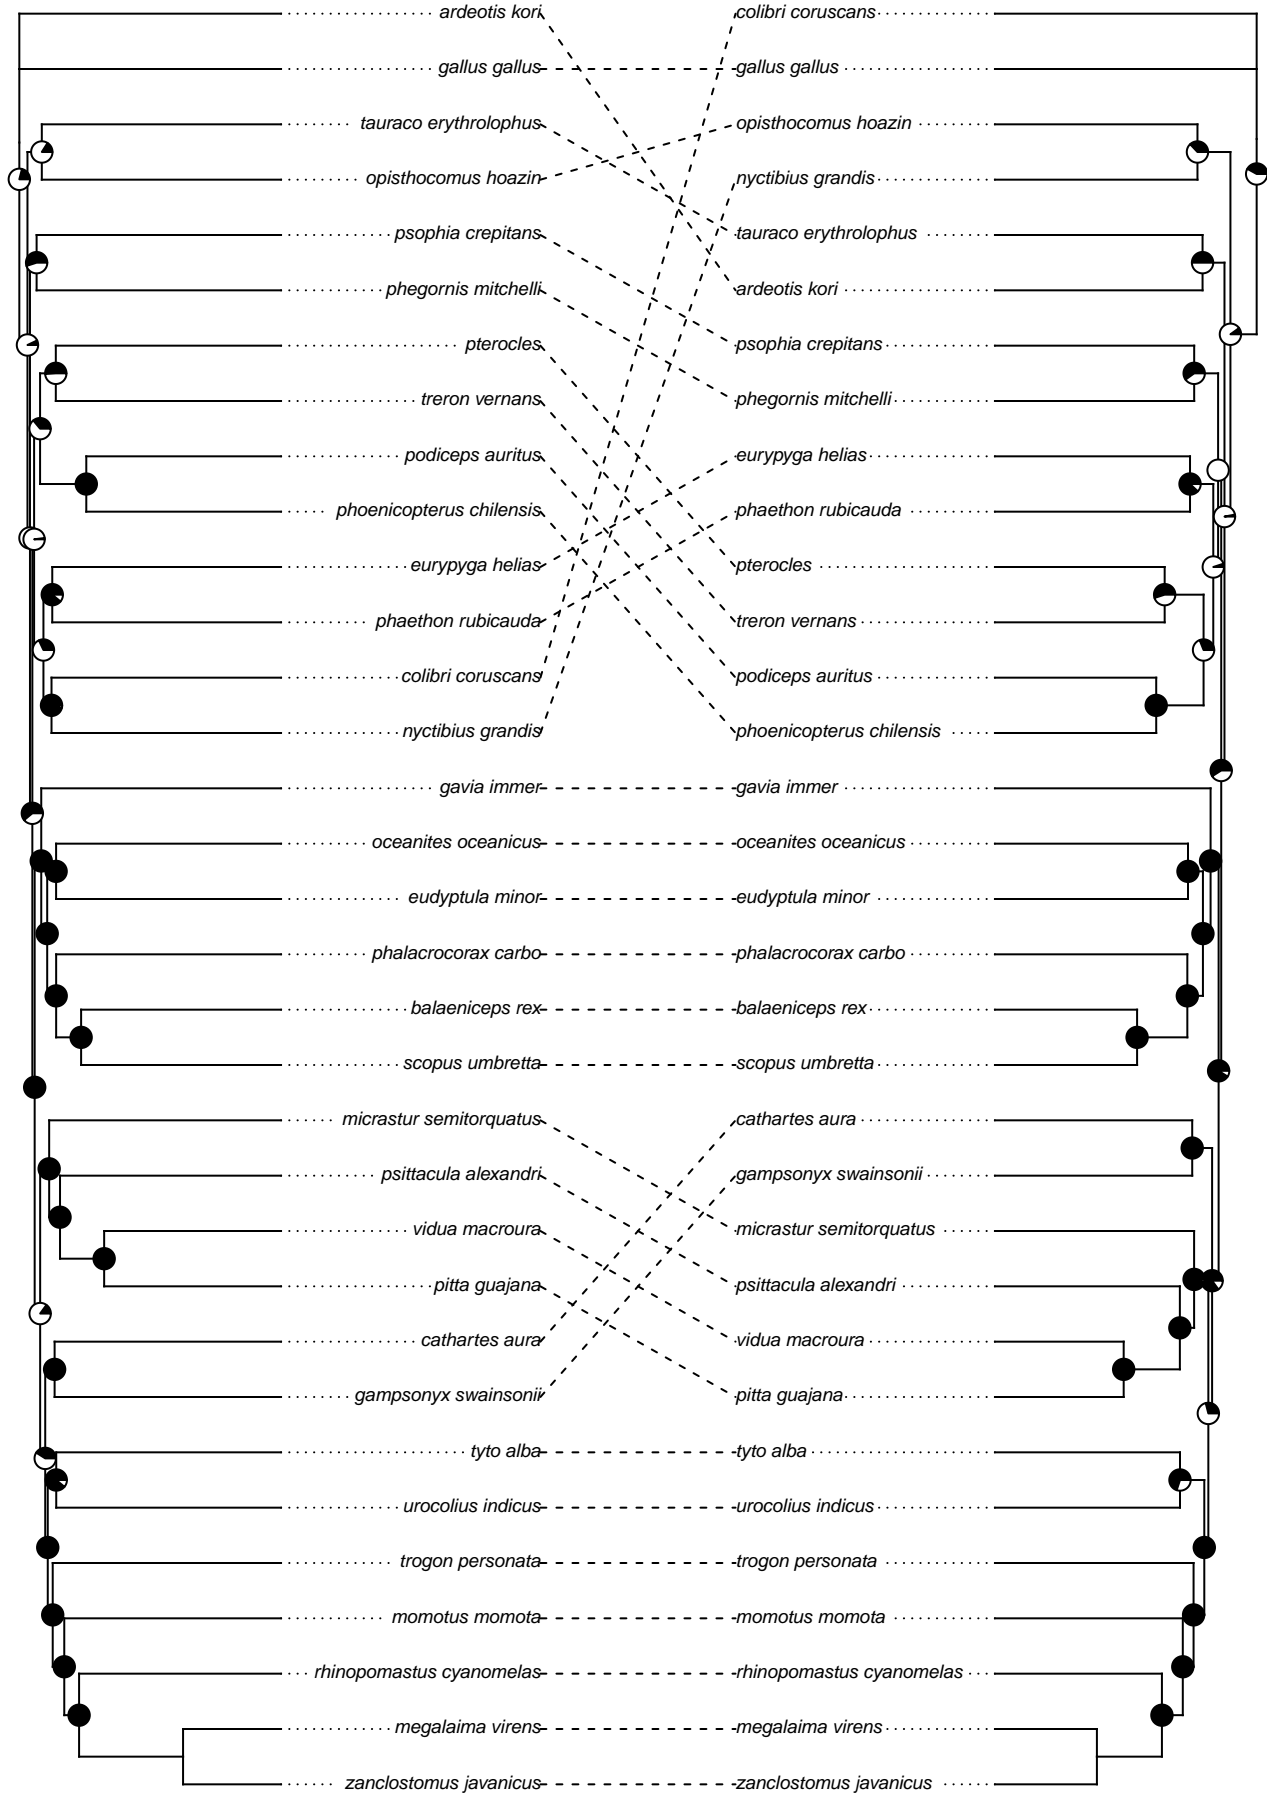

SWSC-EN vs Single (McCormack\_2013)

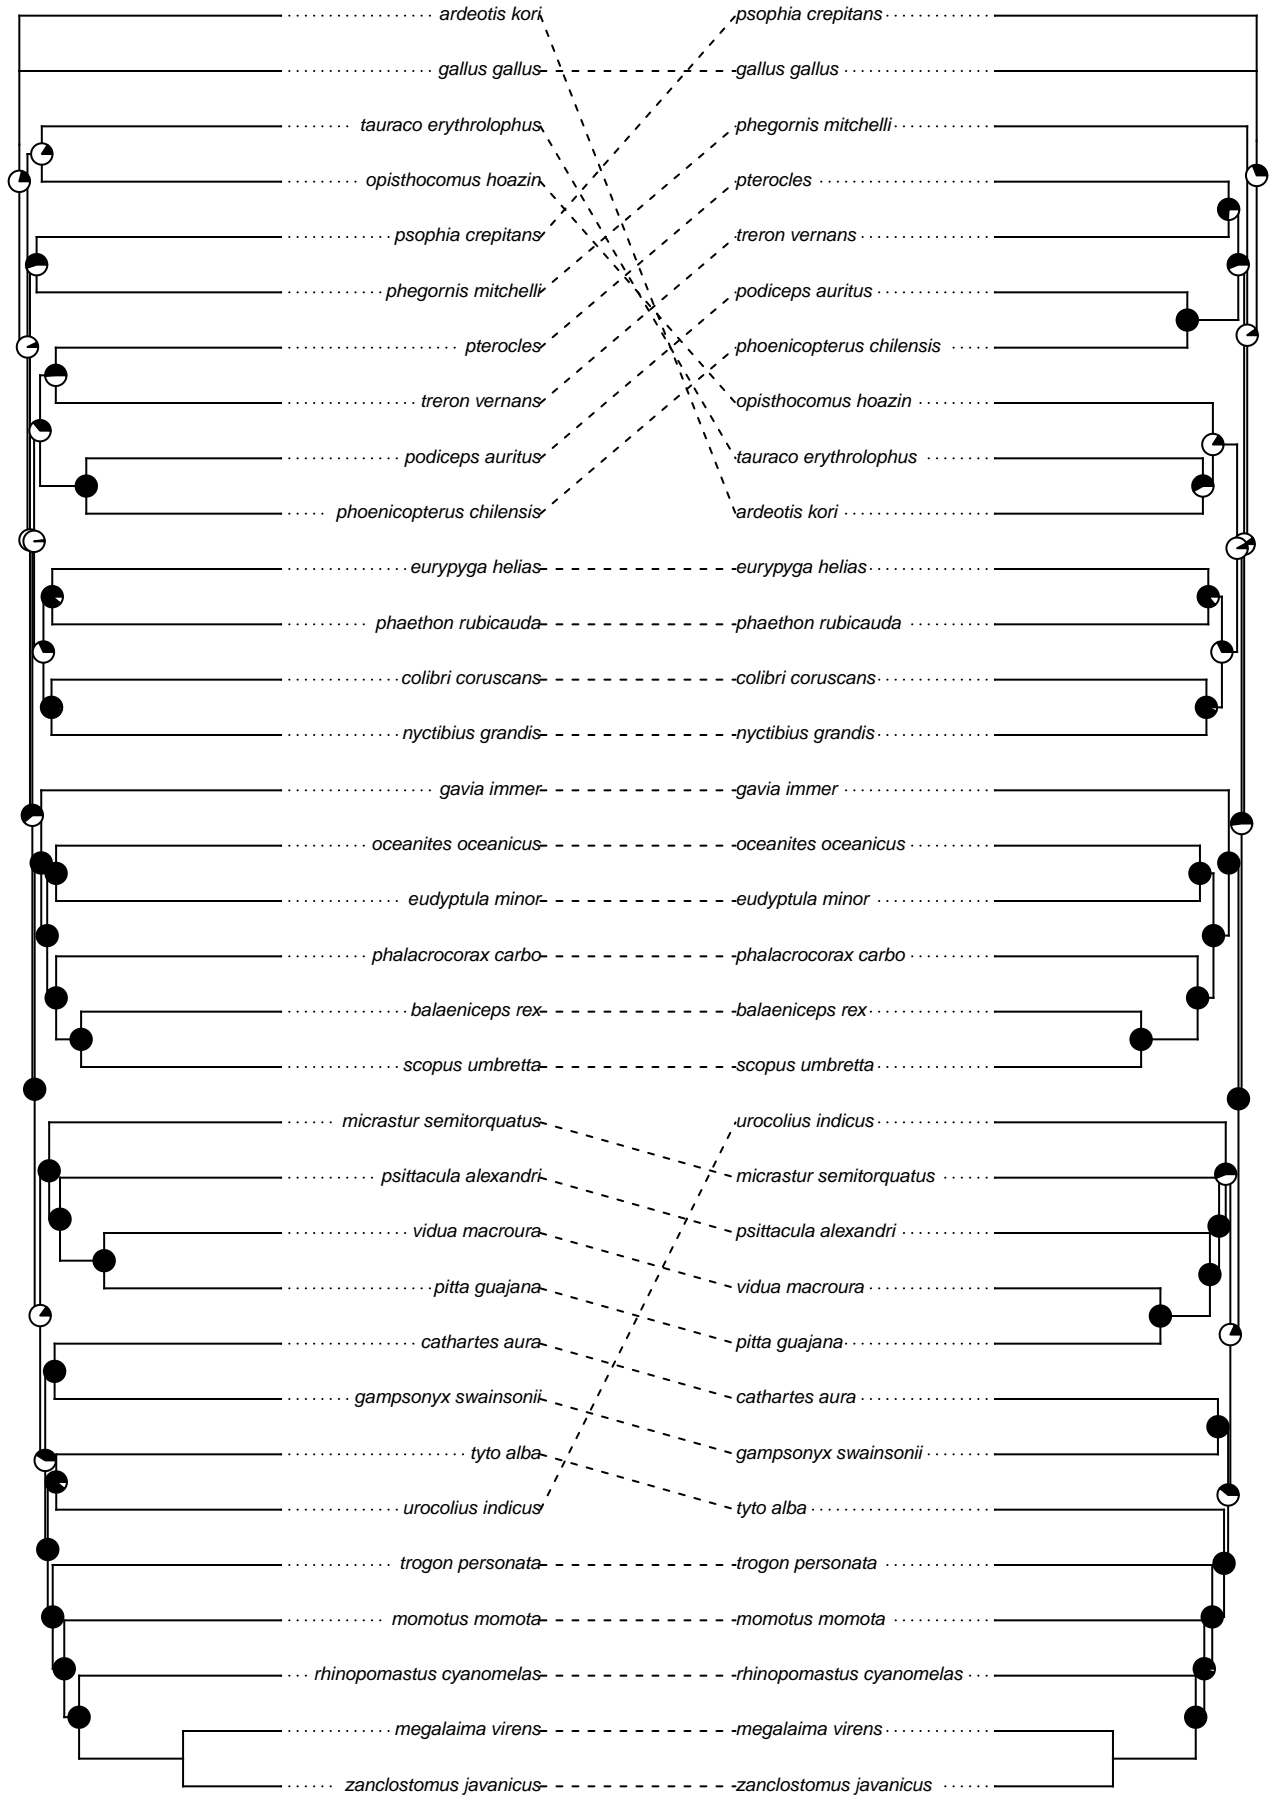

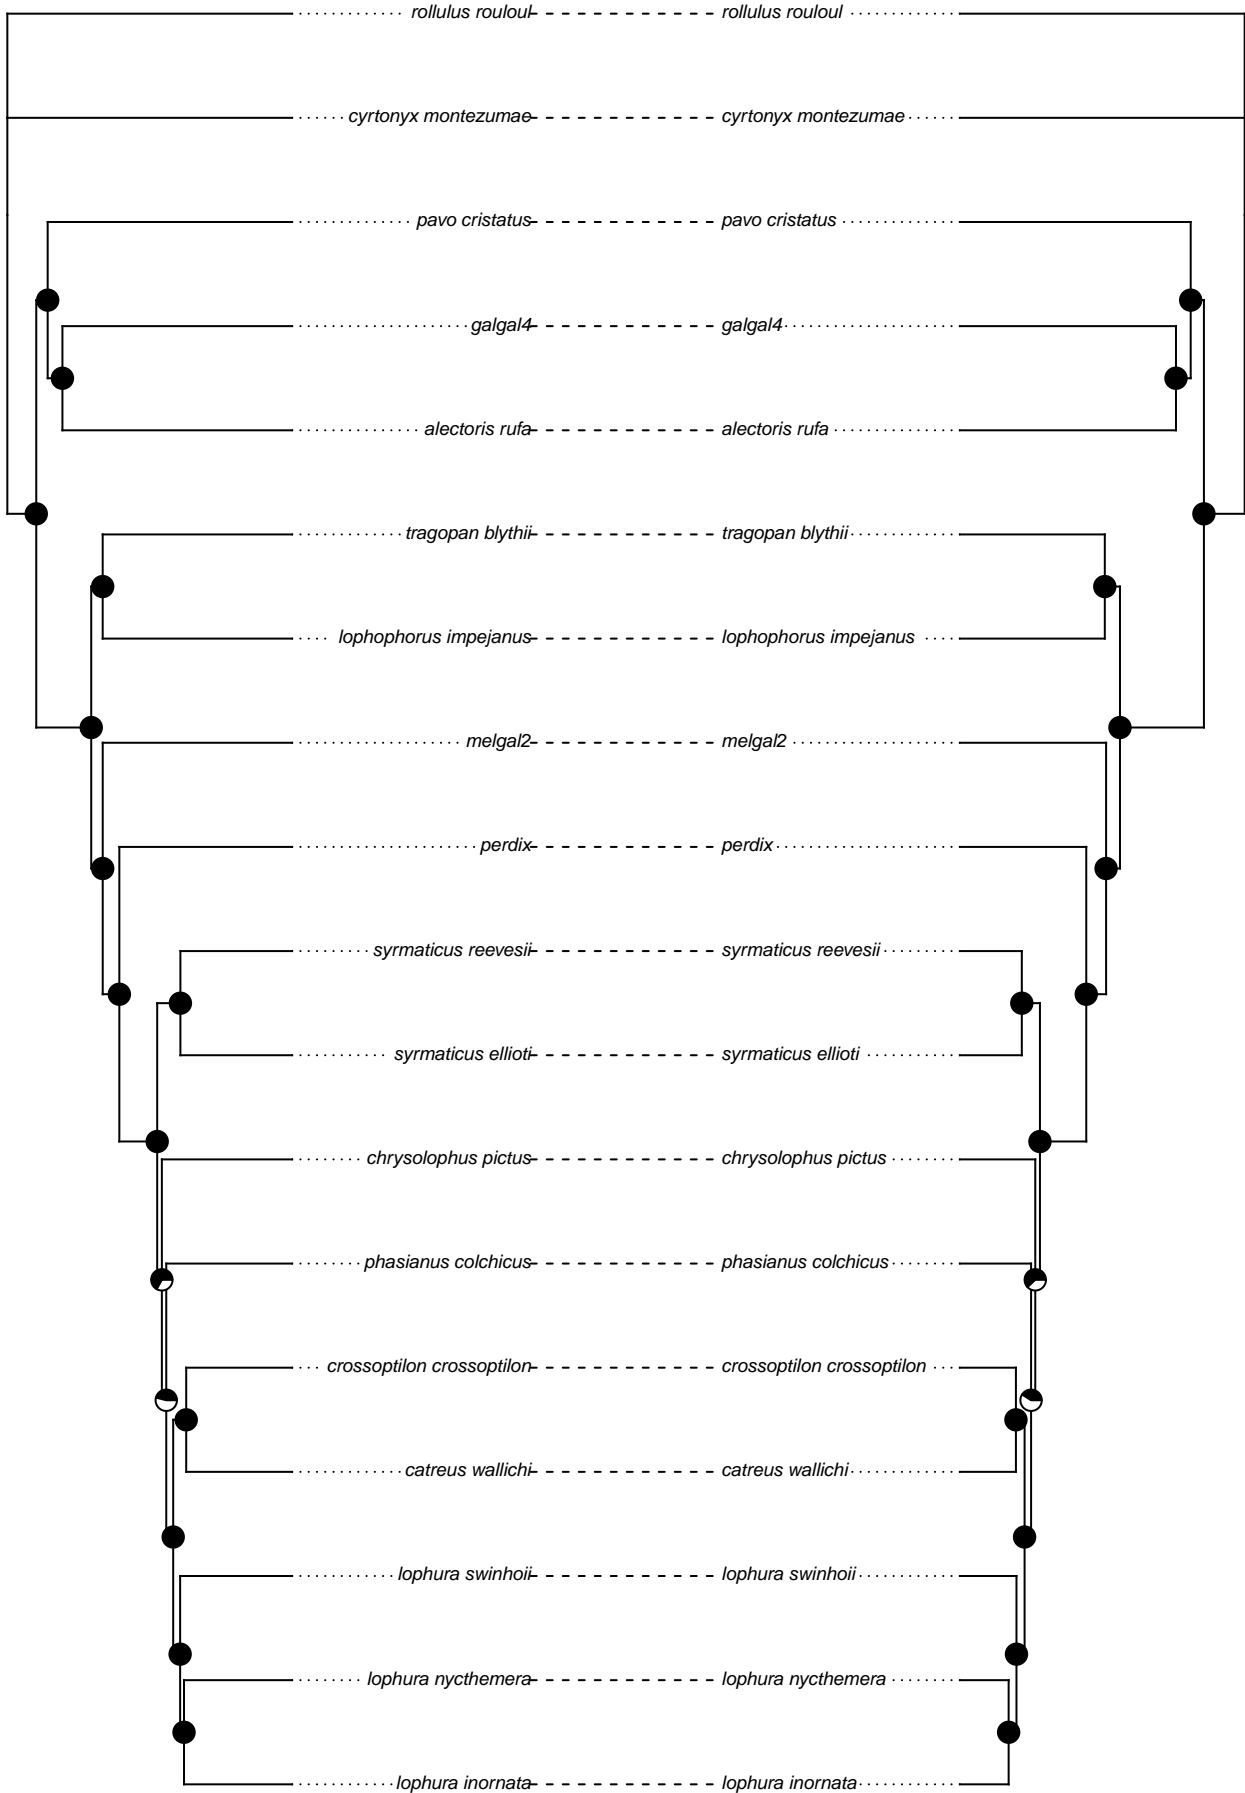

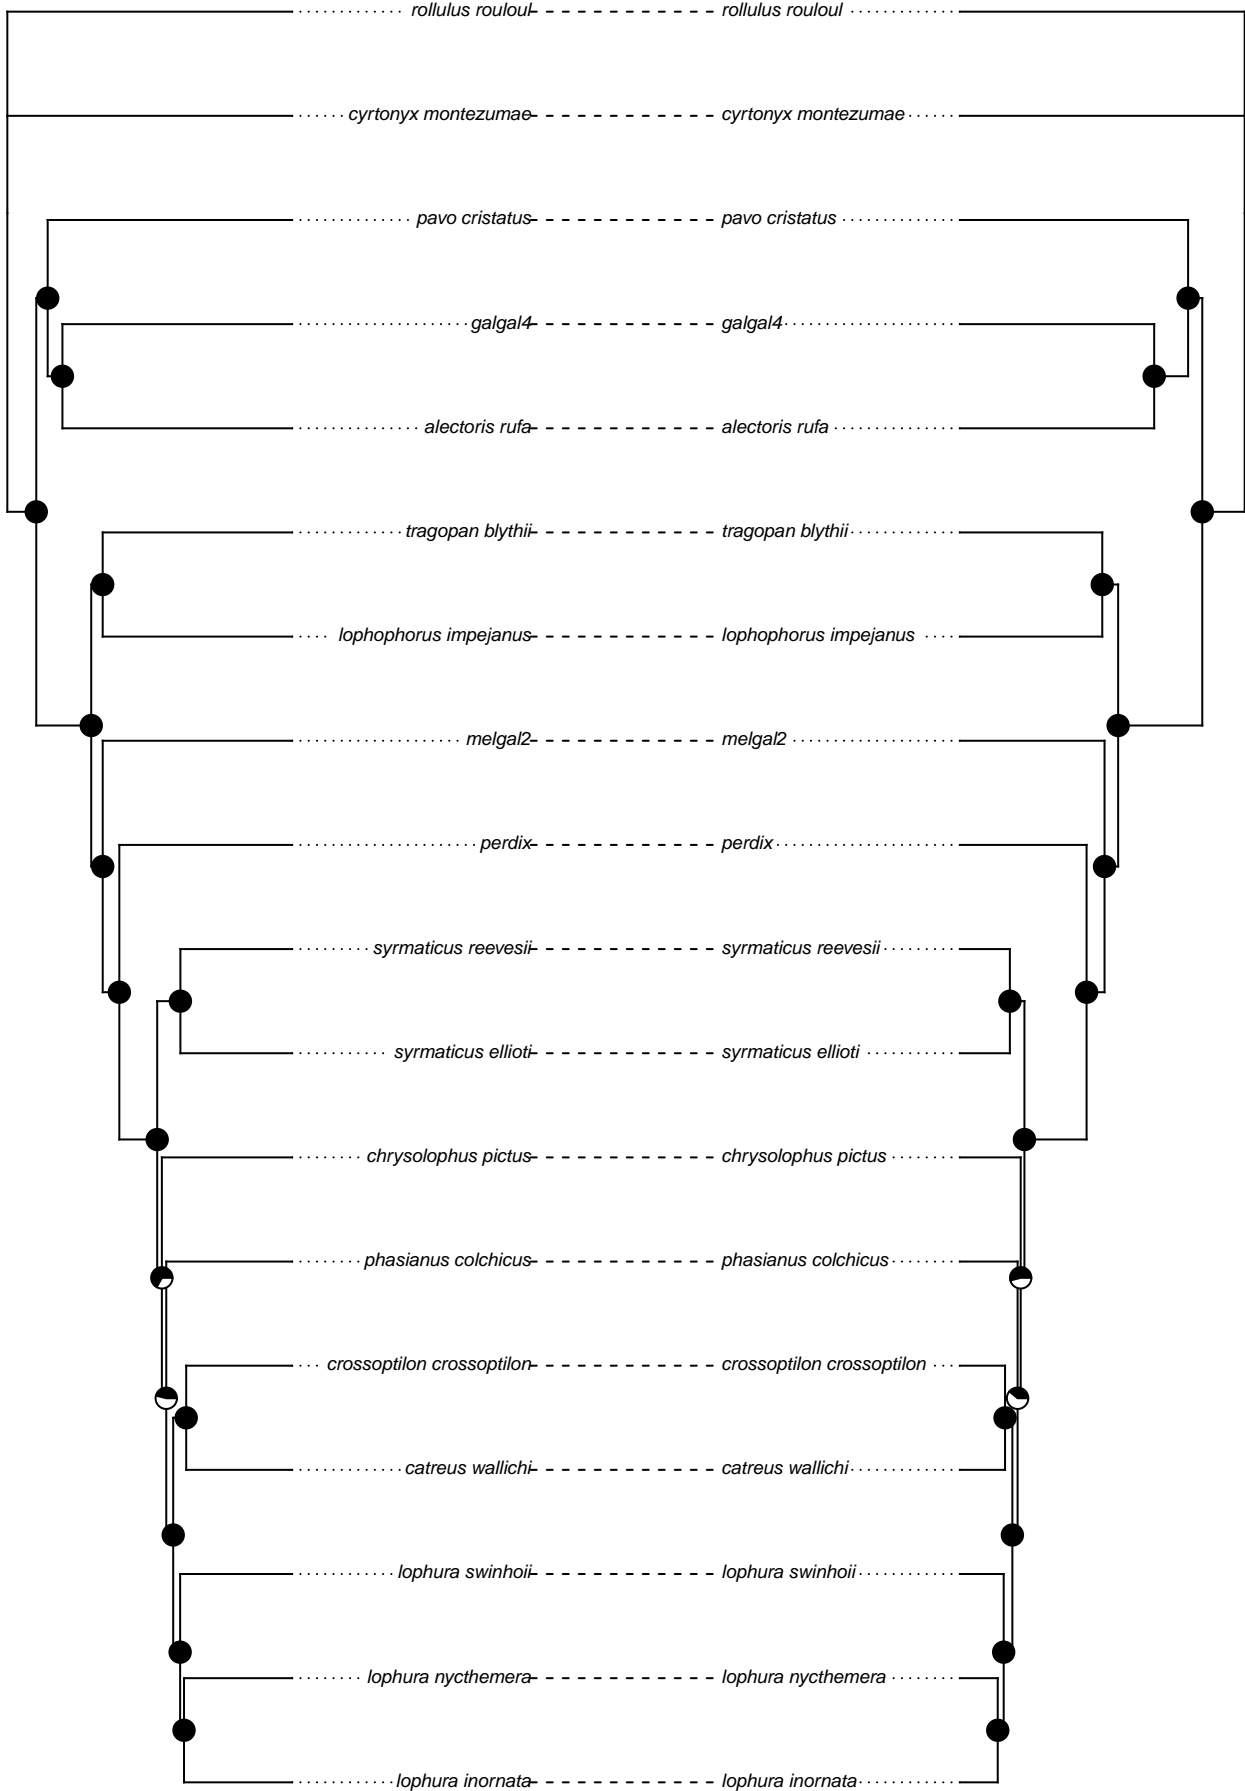

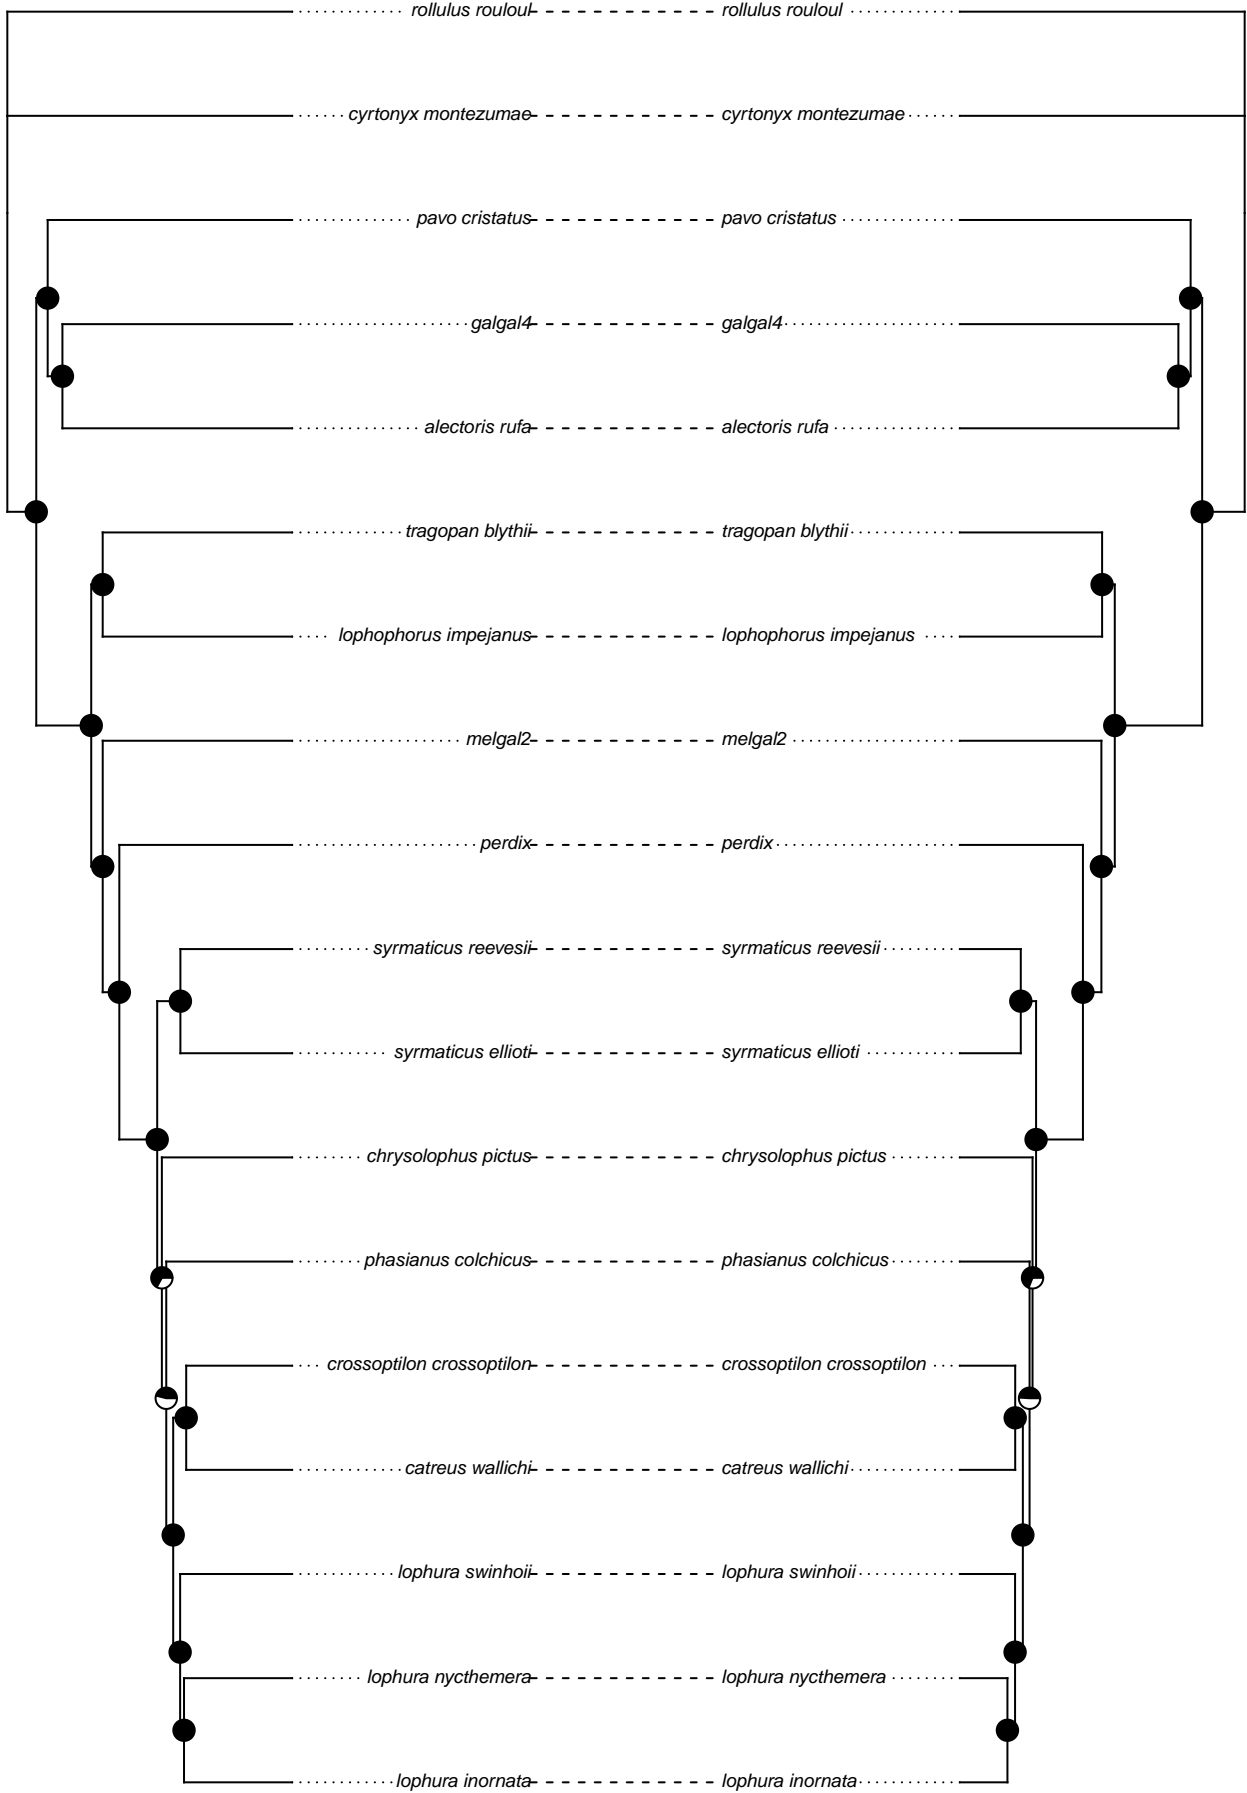

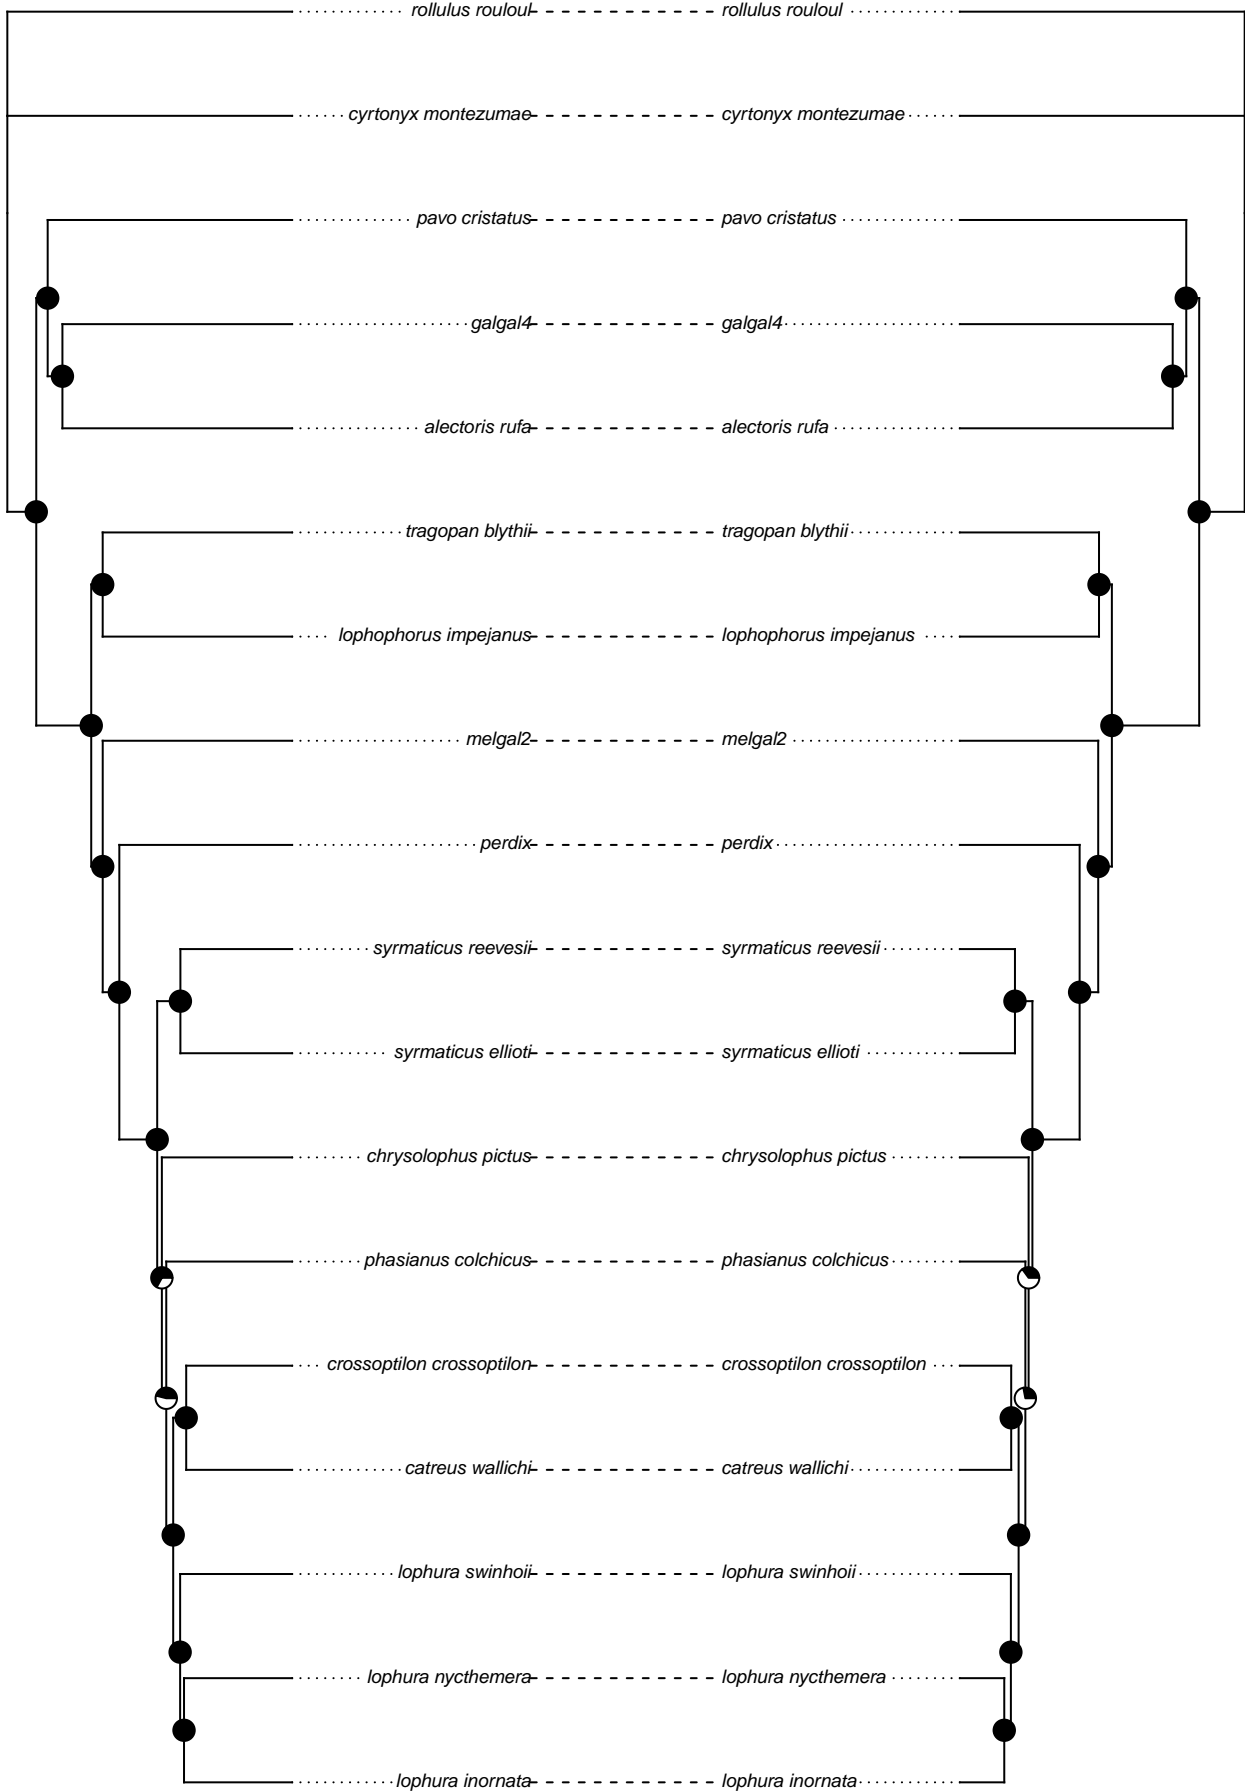

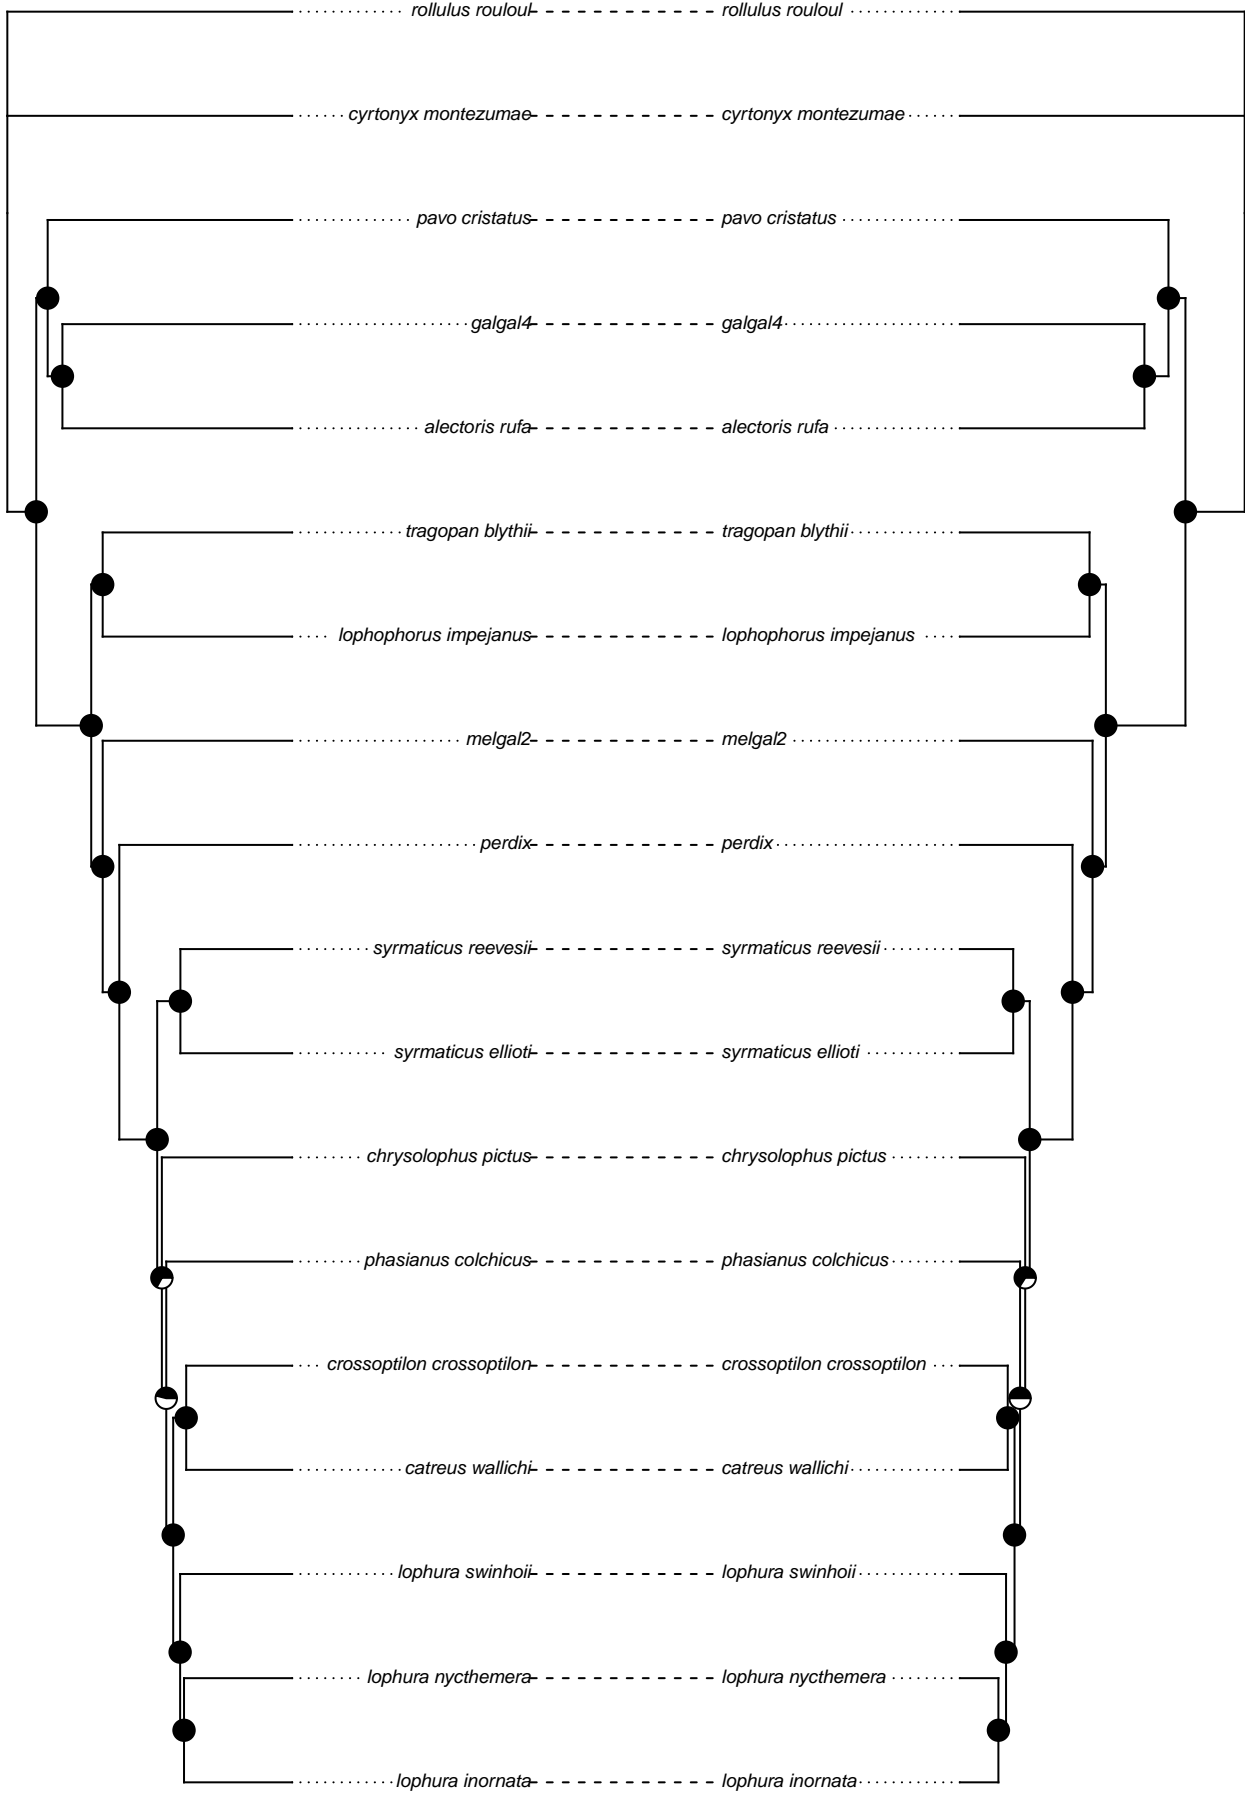

SWSC-EN vs Single (Meiklejohn\_2016)

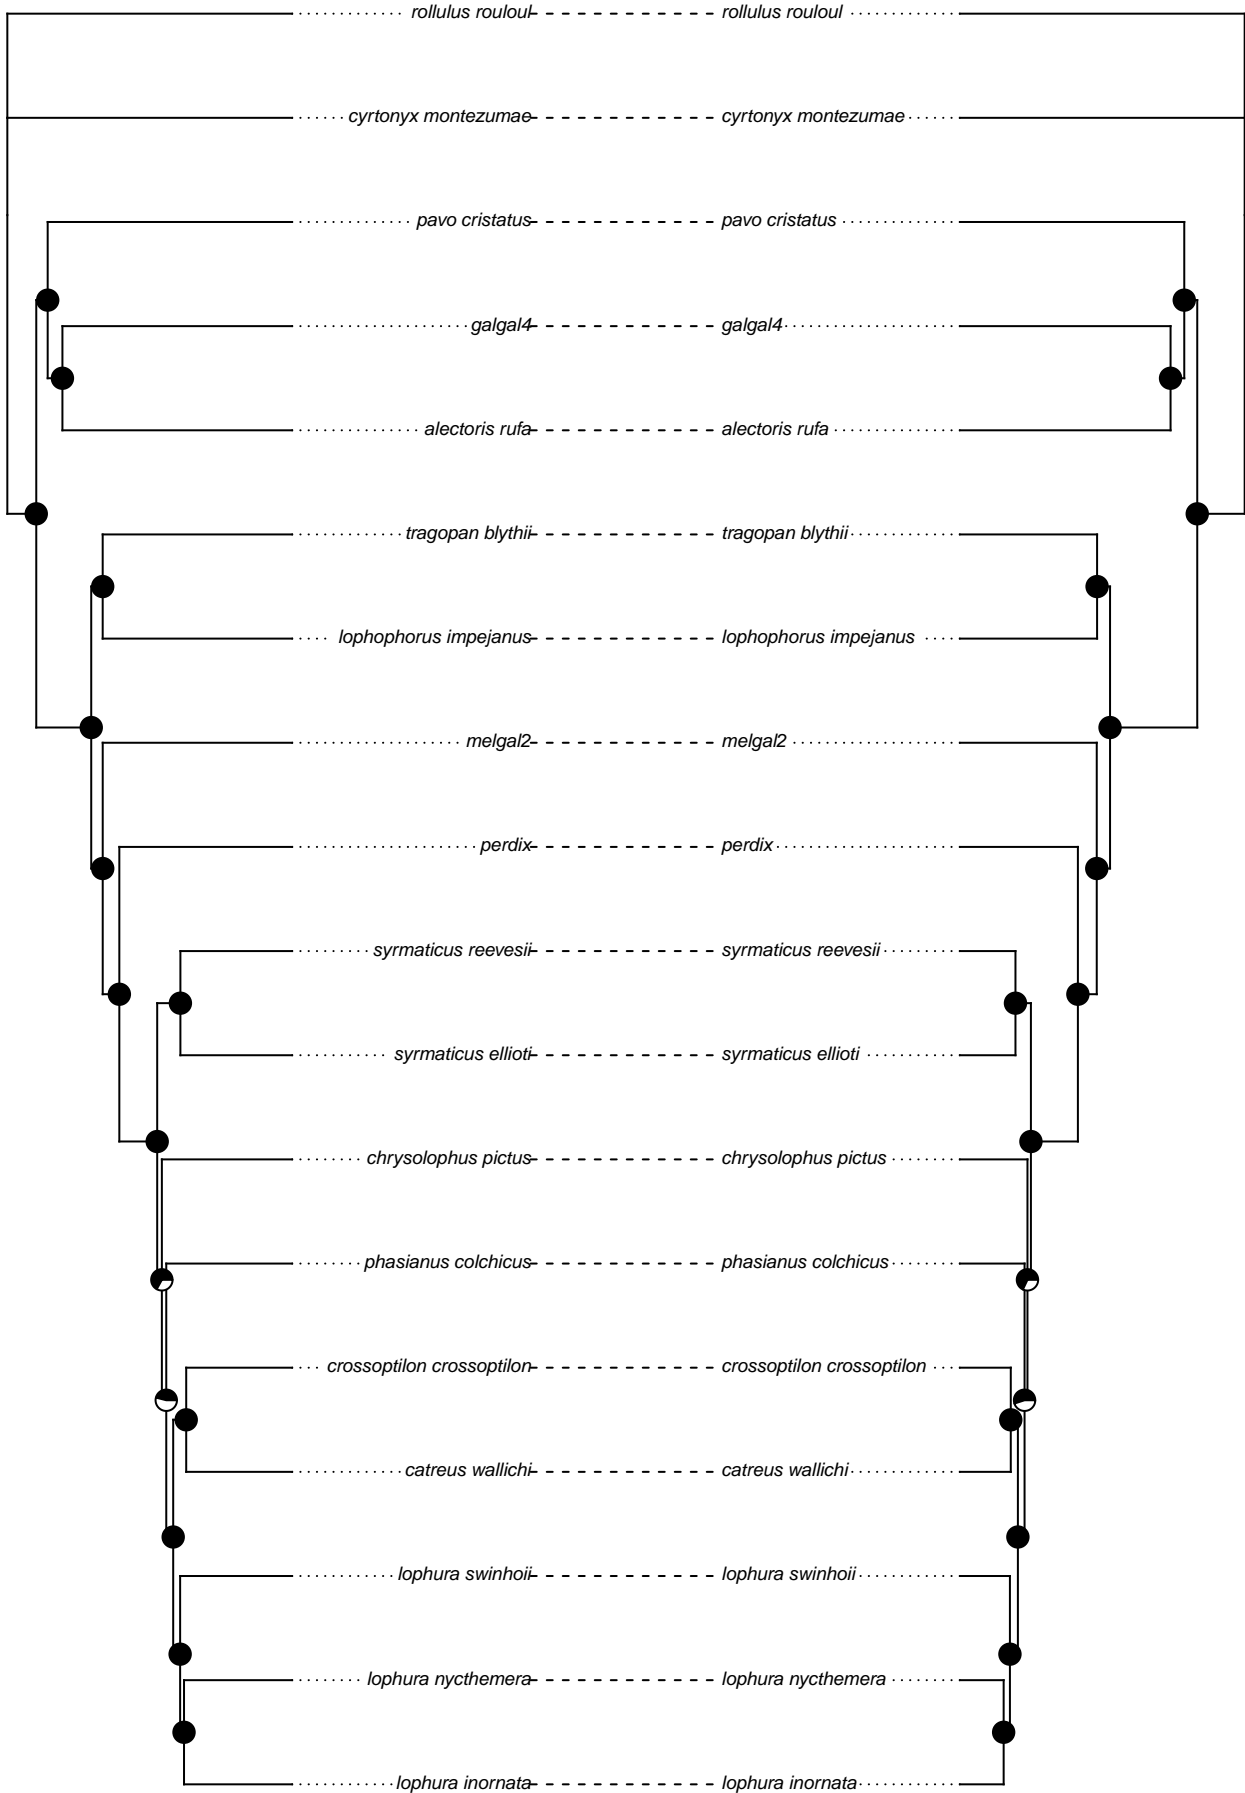



SWSC-EN vs SWSC-GC (Moyle\_2016)

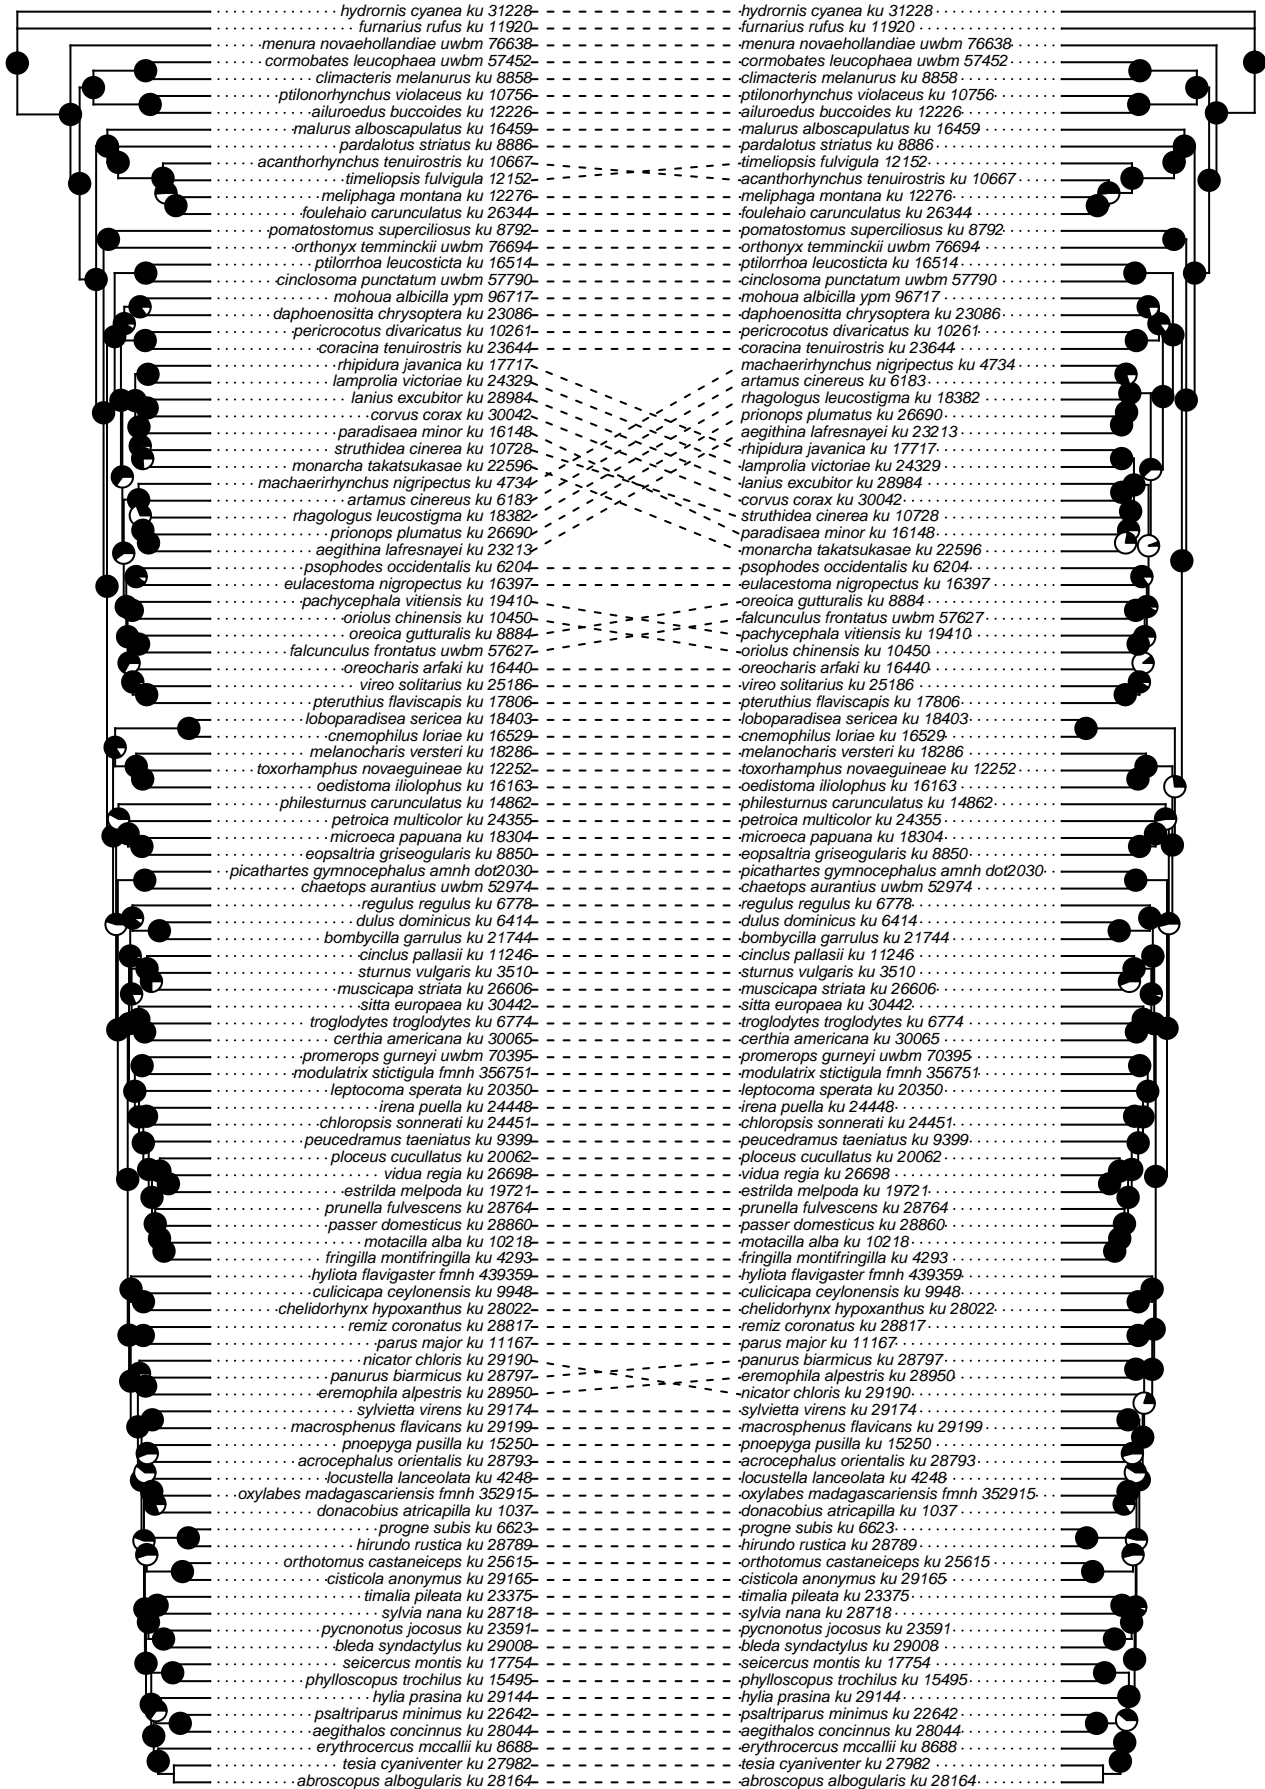

SWSC-EN vs SWSC-MU (Moyle\_2016)

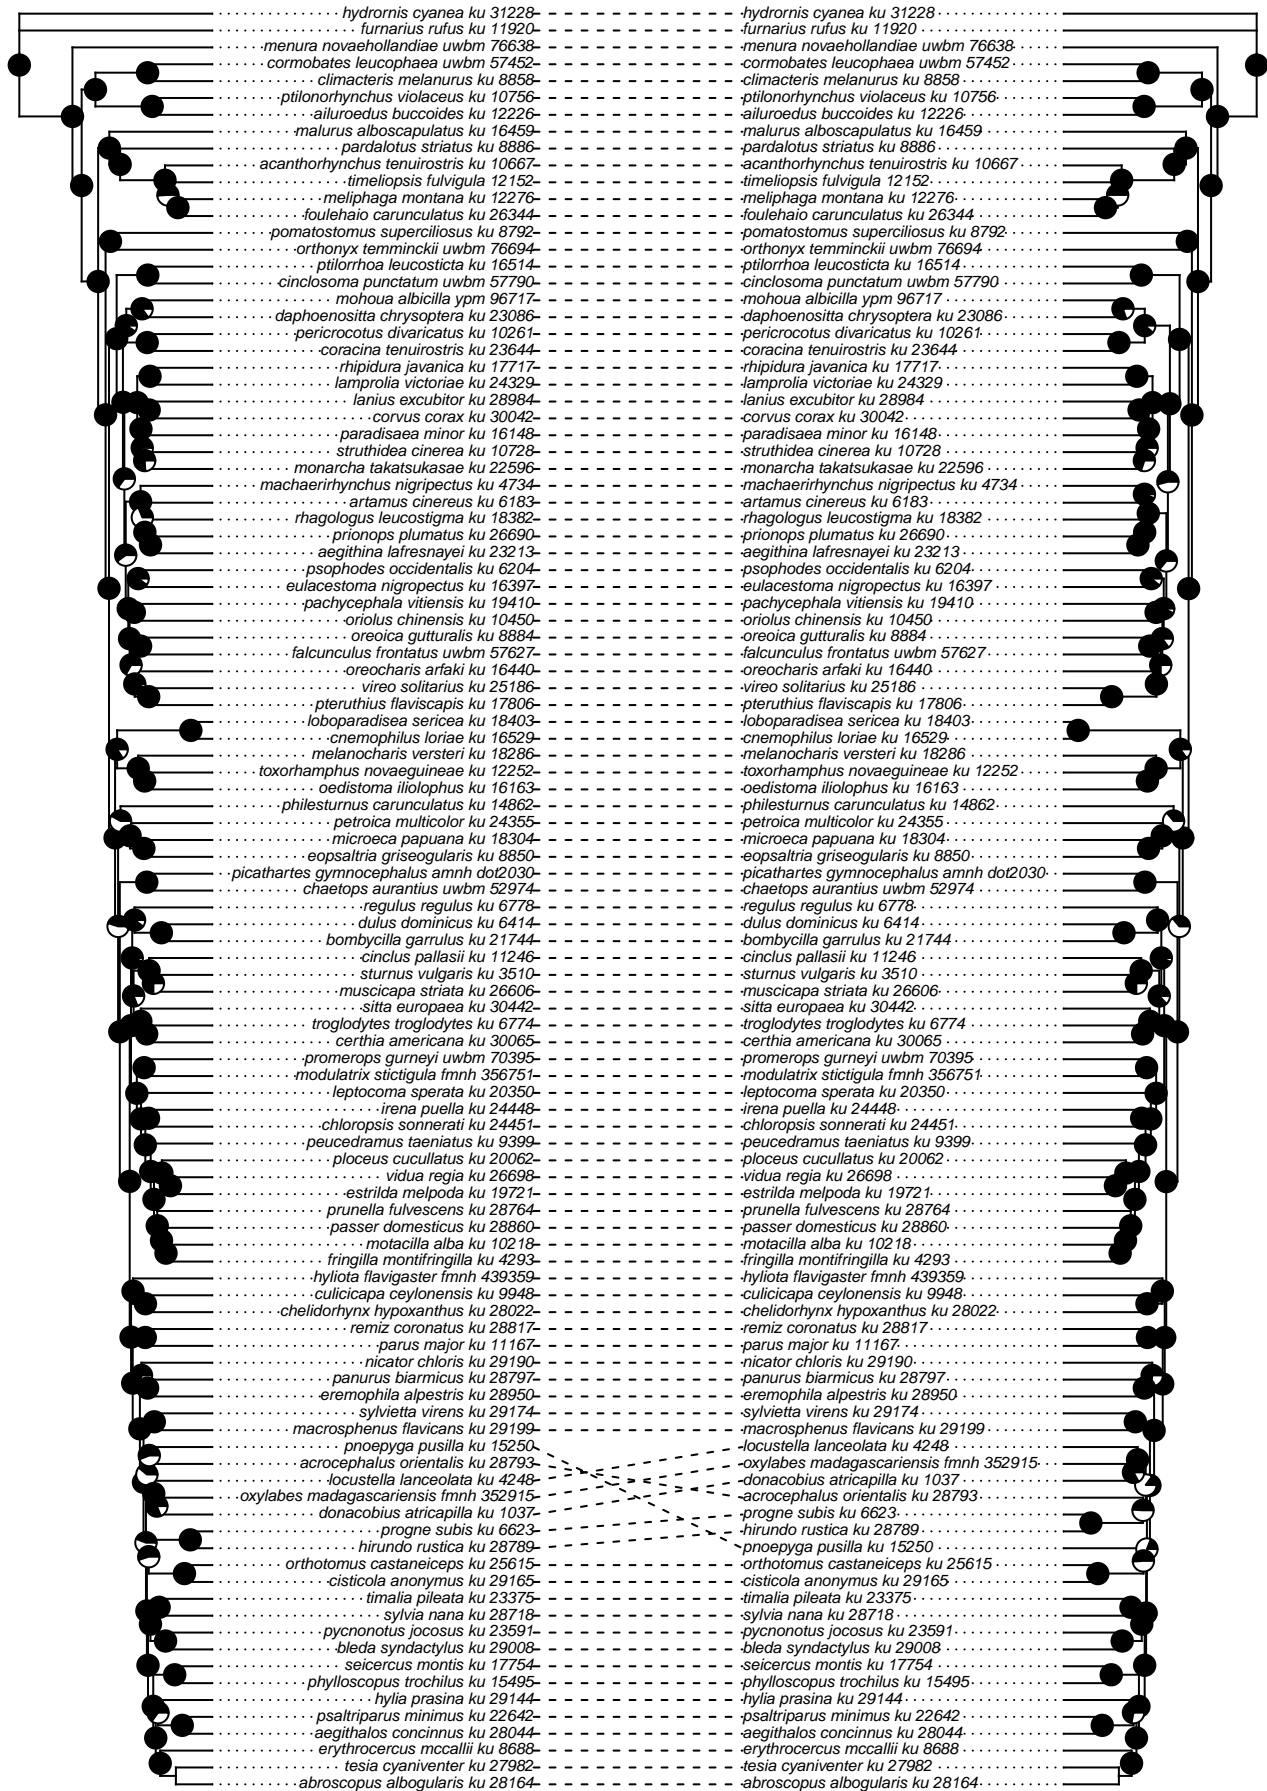

SWSC-EN vs UCESP (Moyle\_2016)

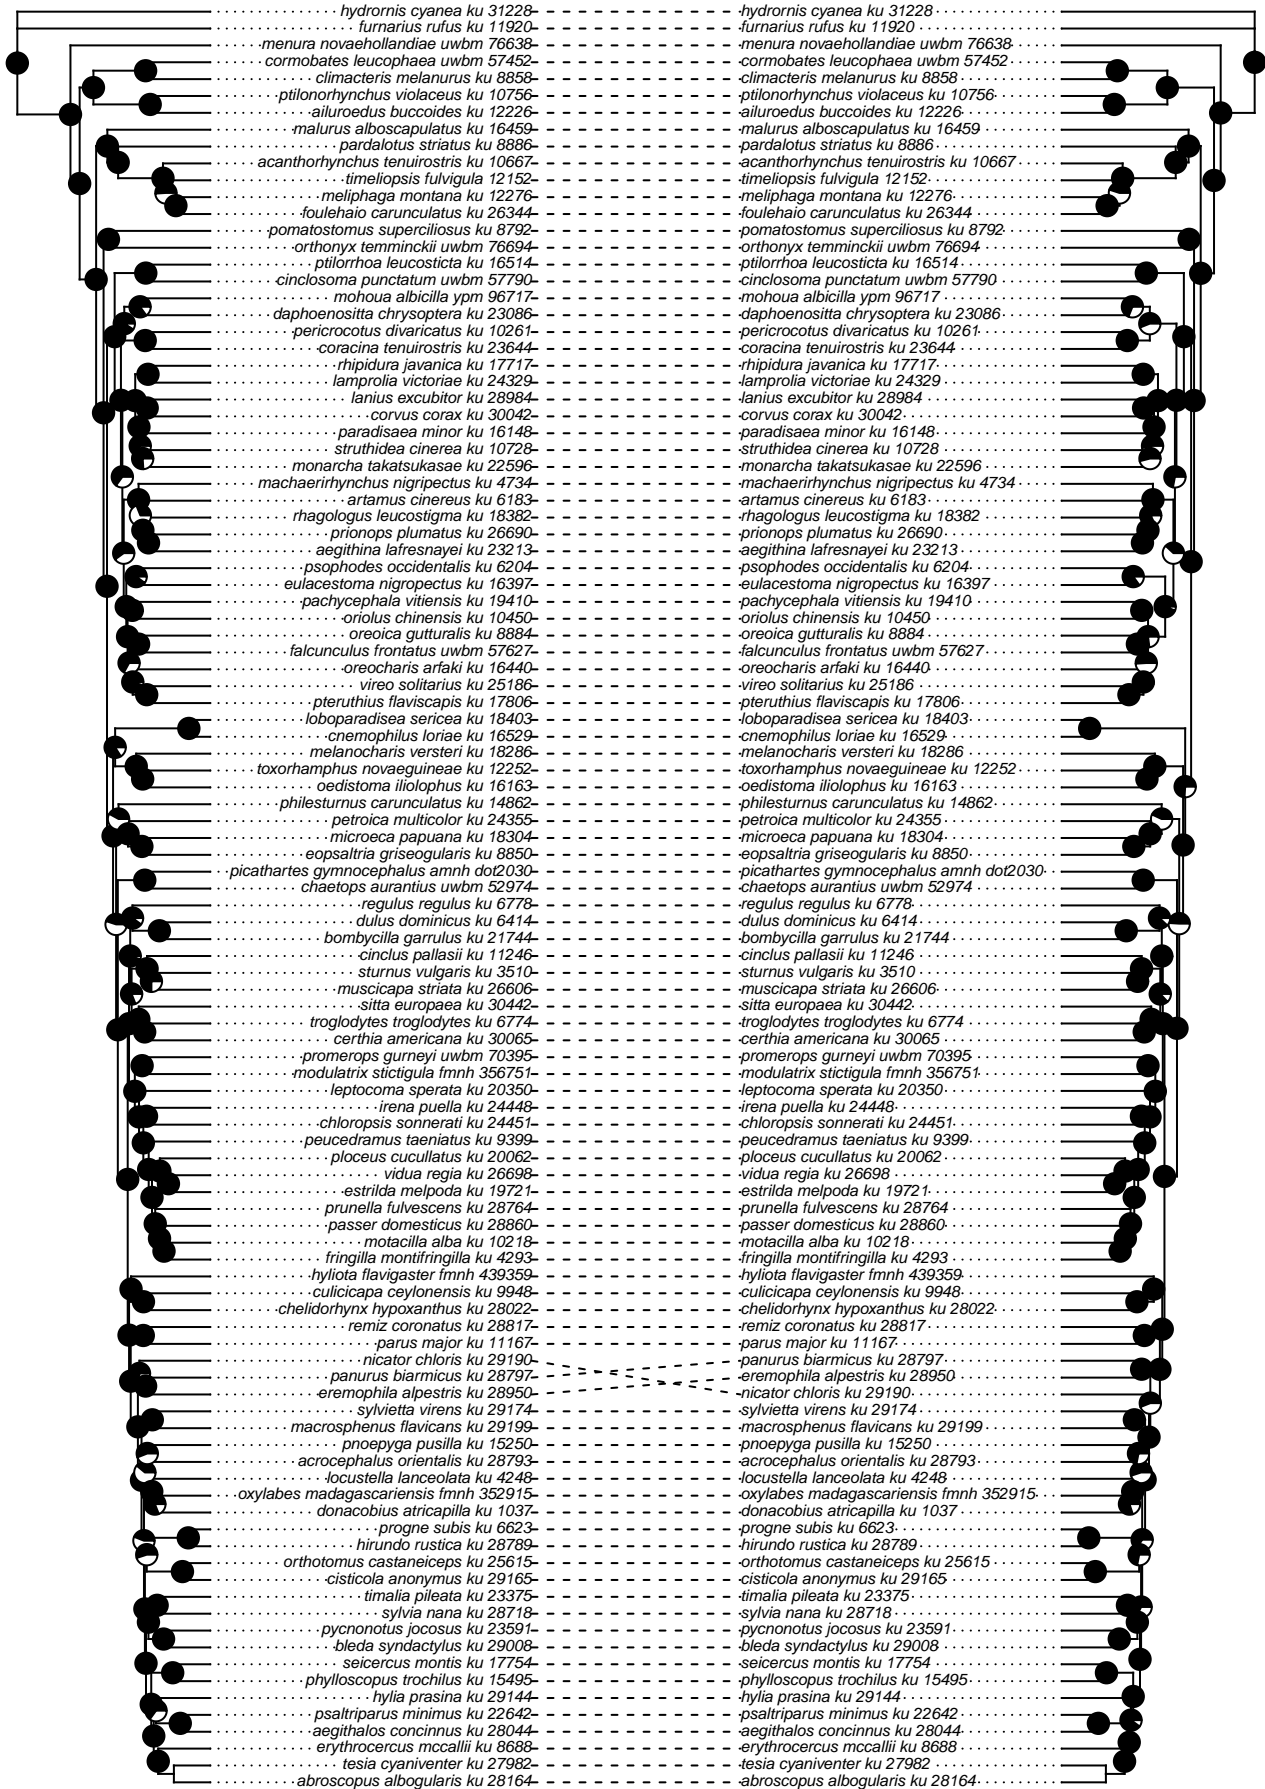

SWSC-EN vs PF-UCE (Moyle\_2016)

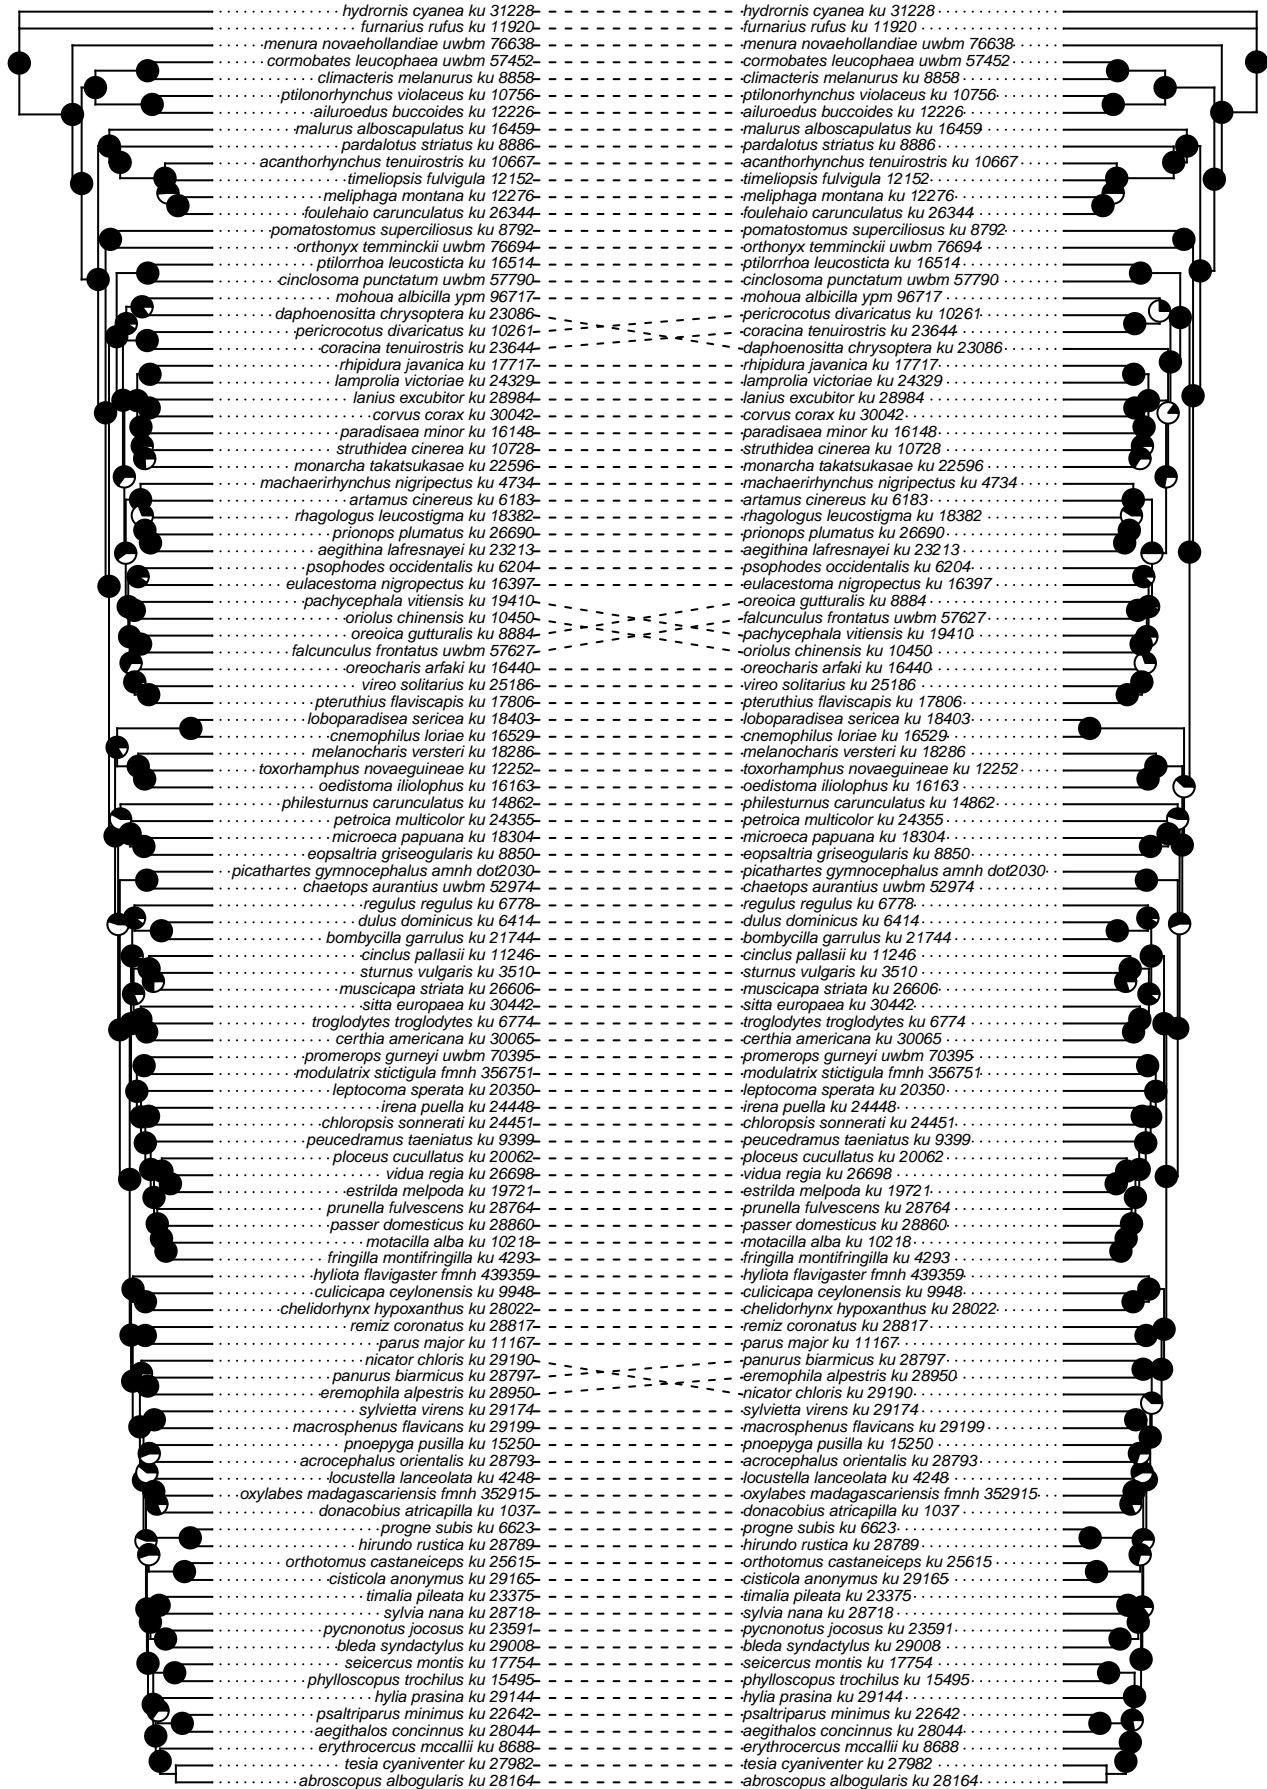

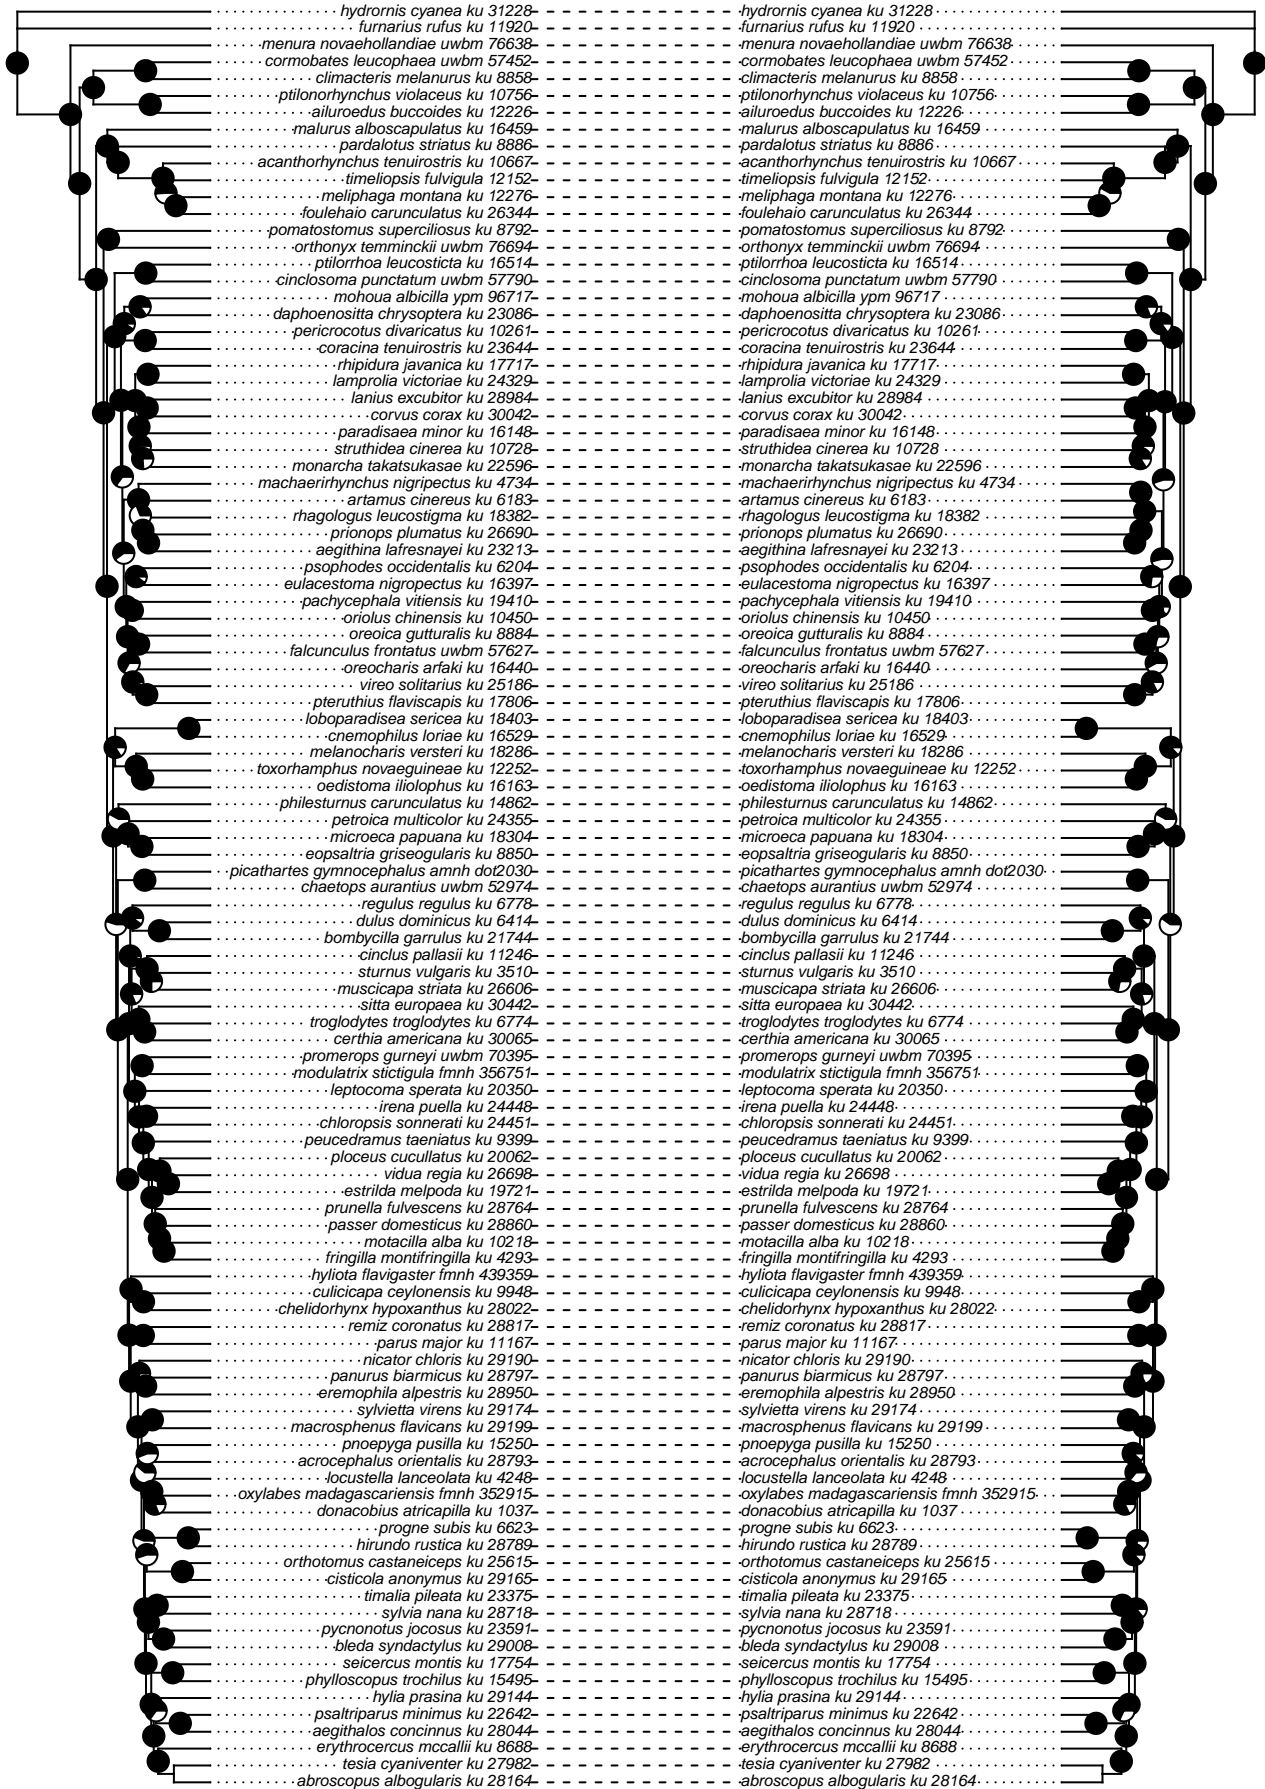

SWSC-EN vs Single (Moyle\_2016)

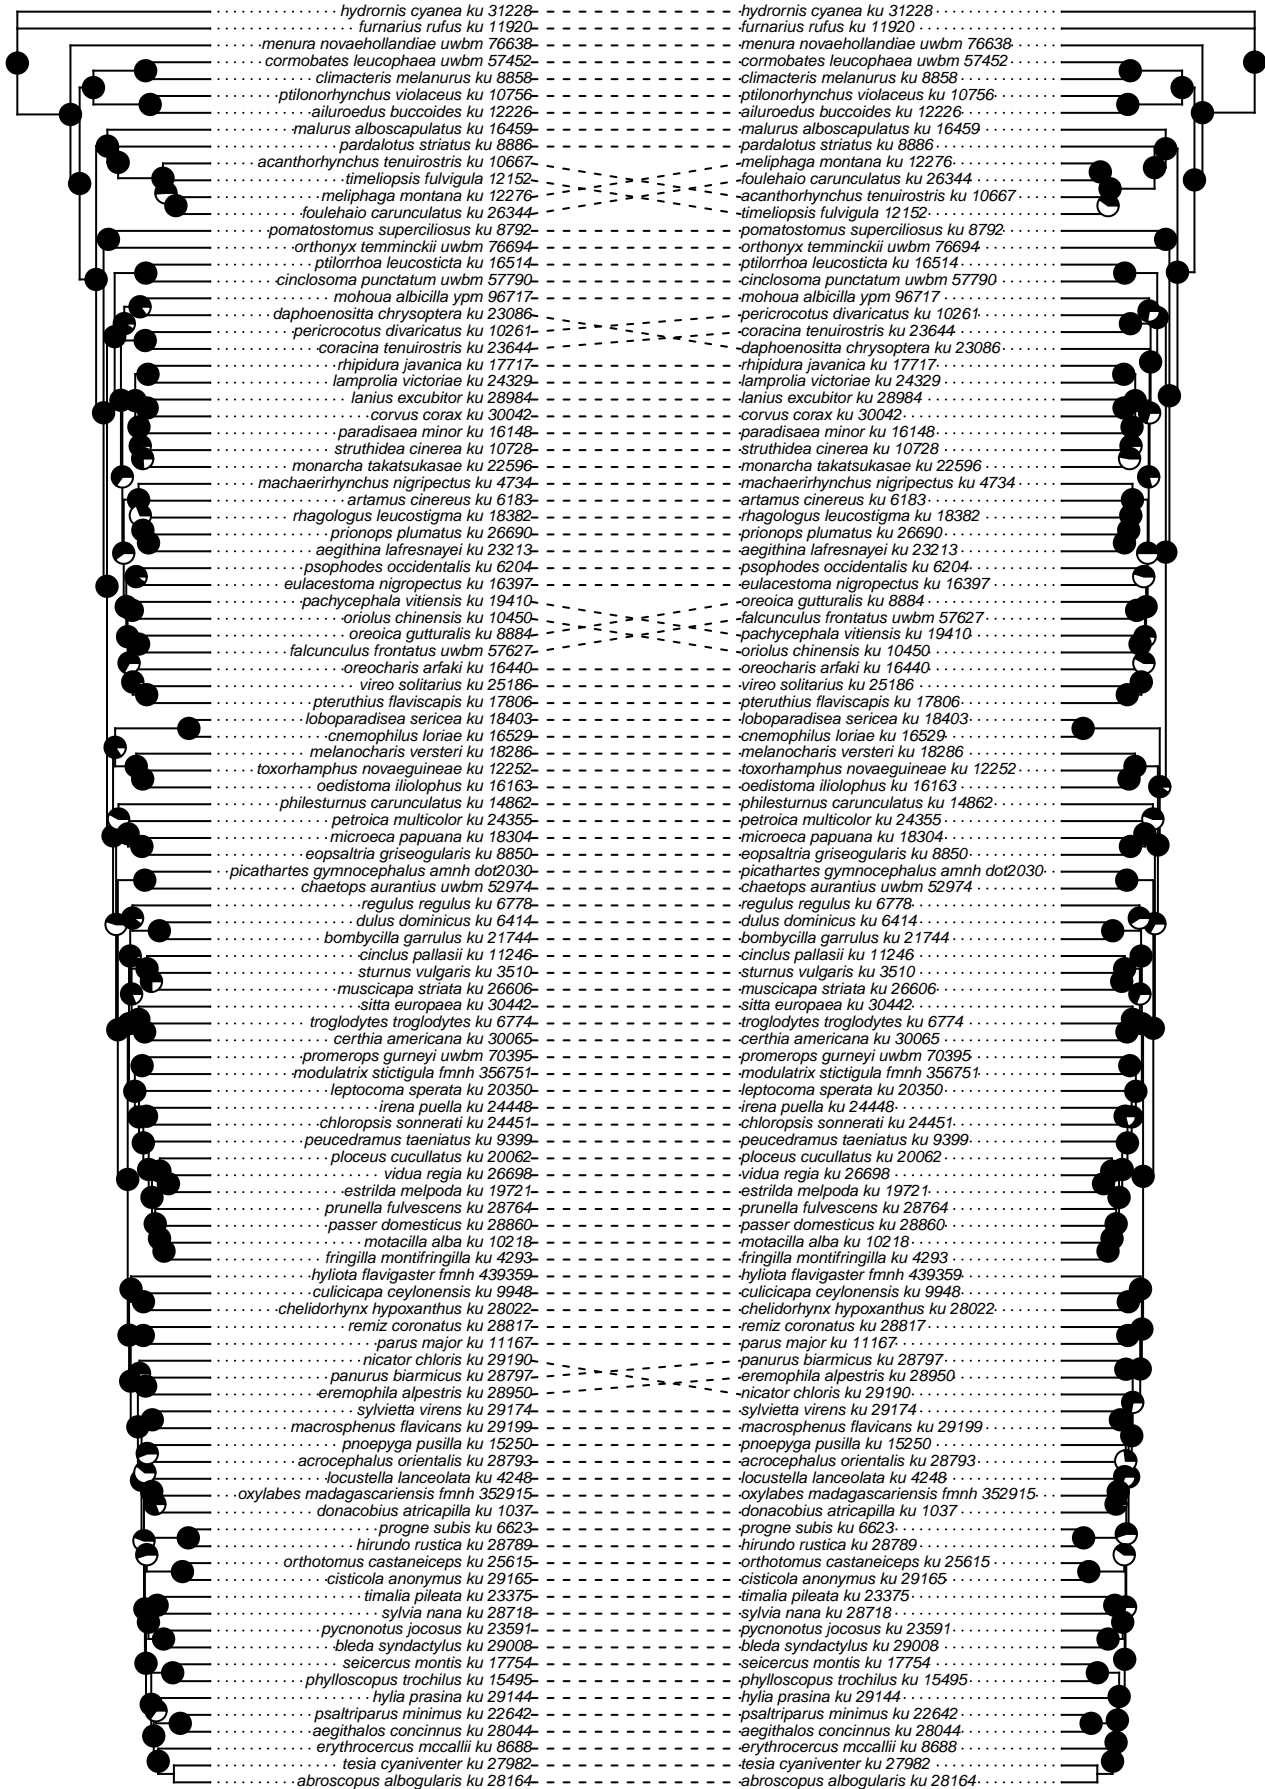

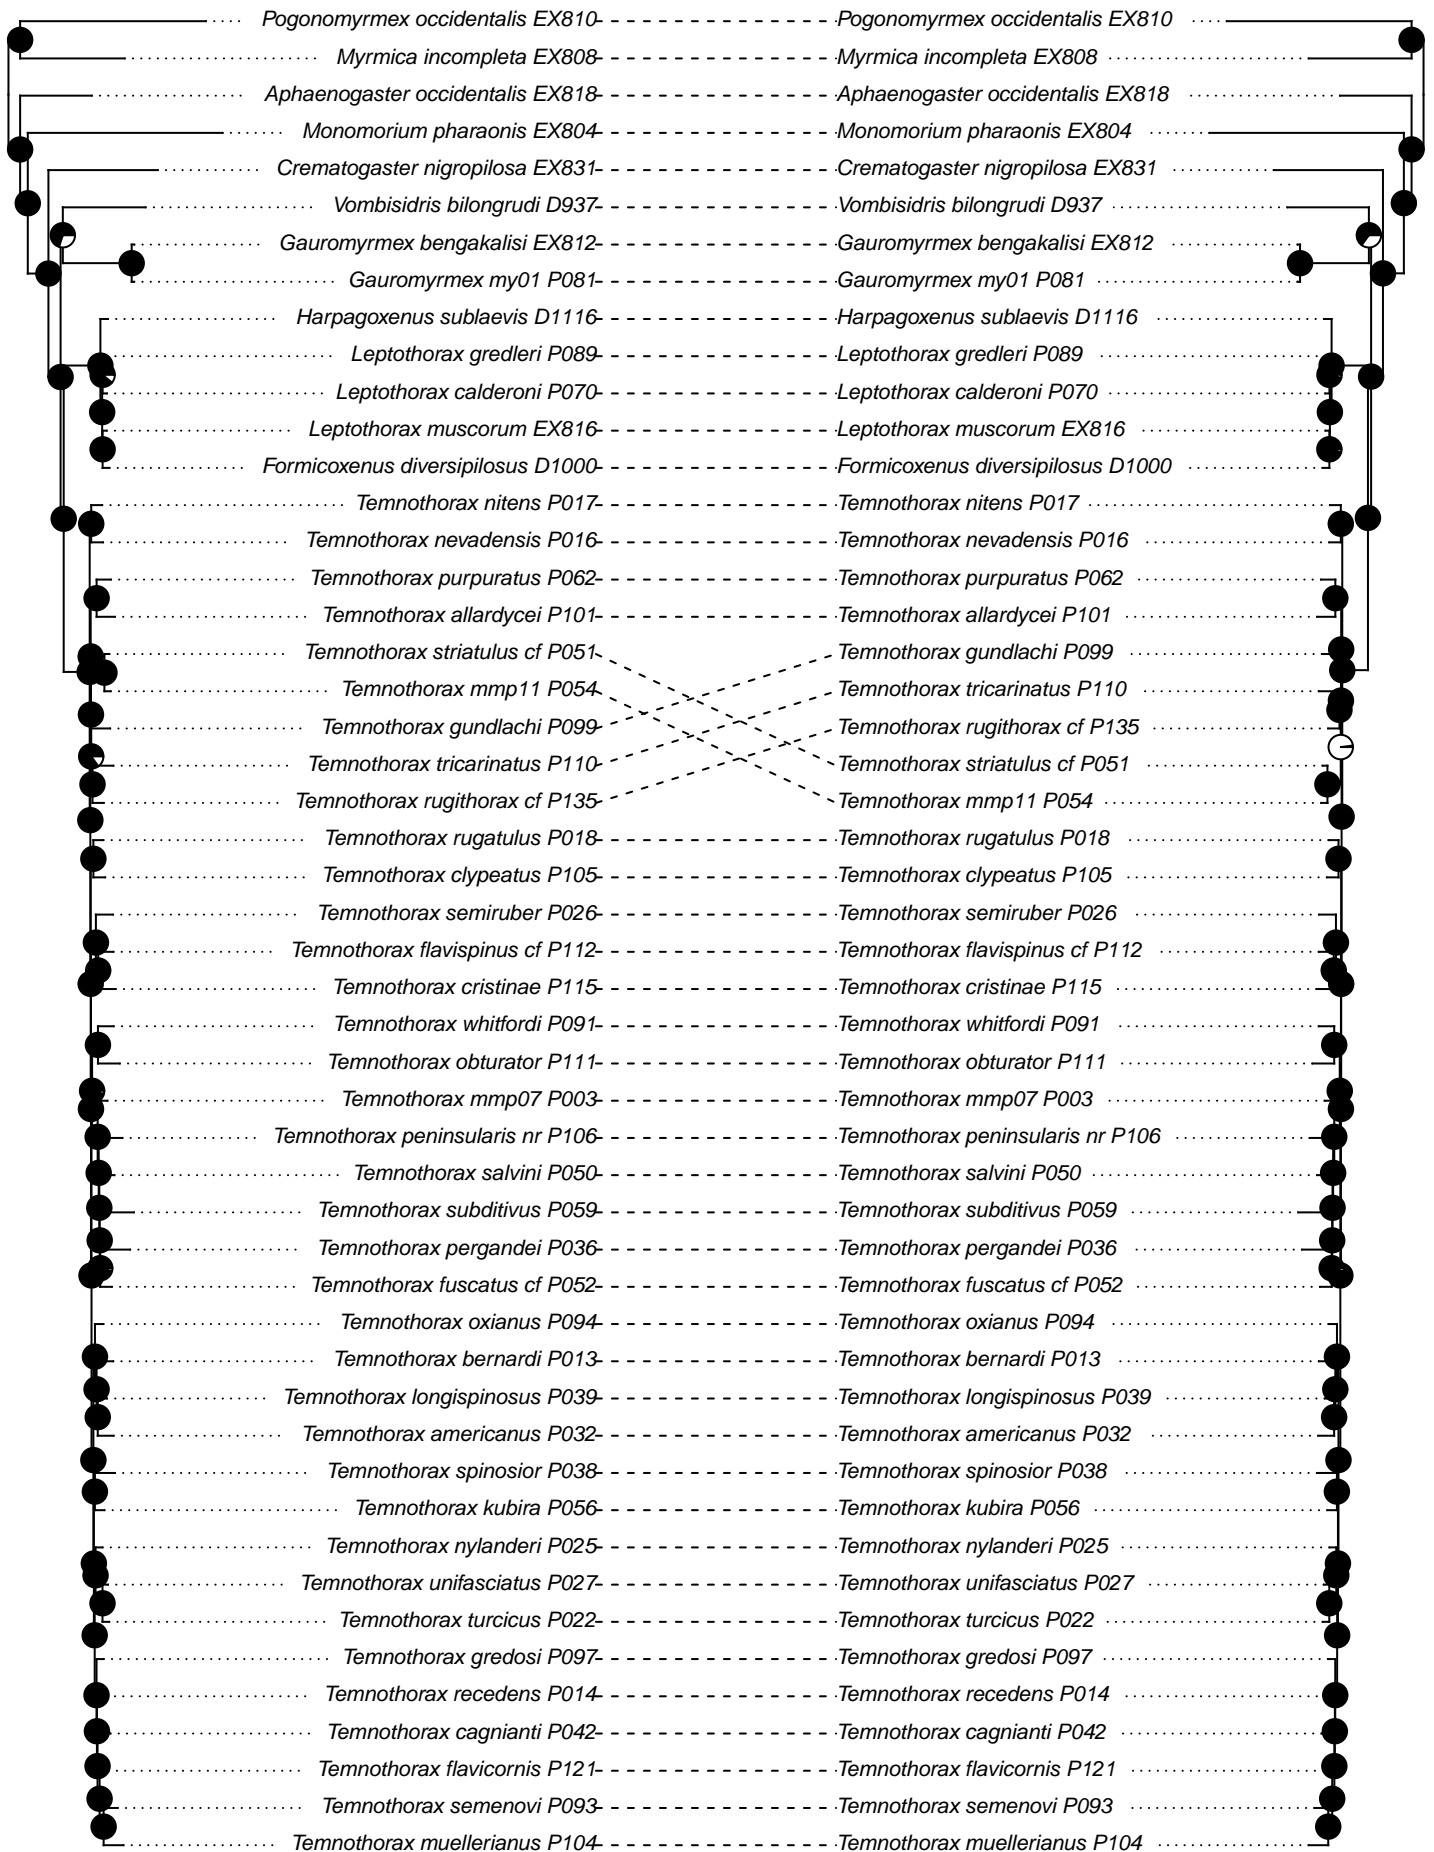

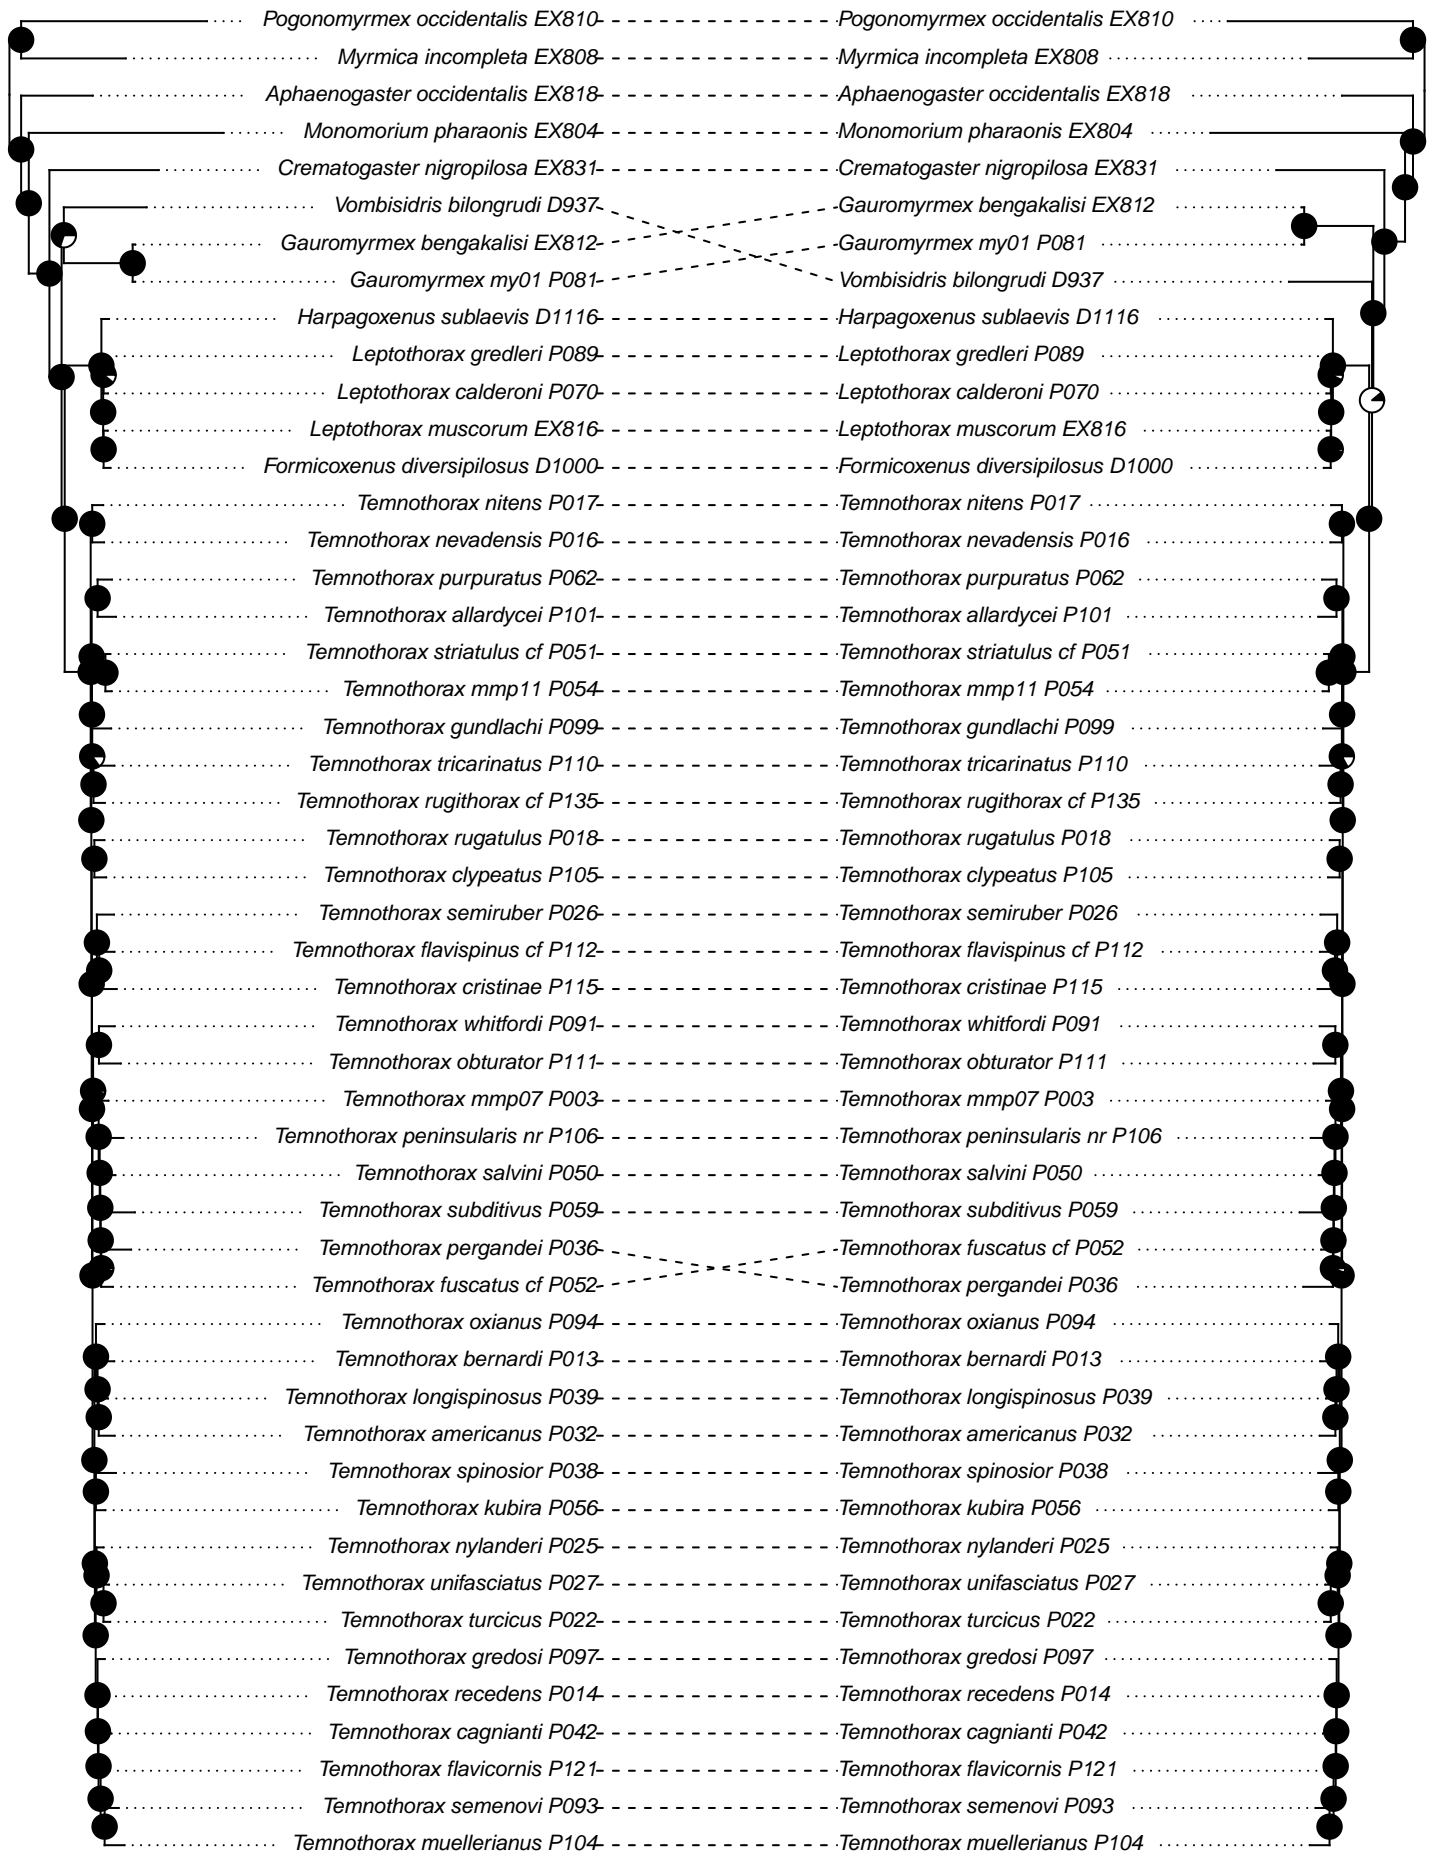



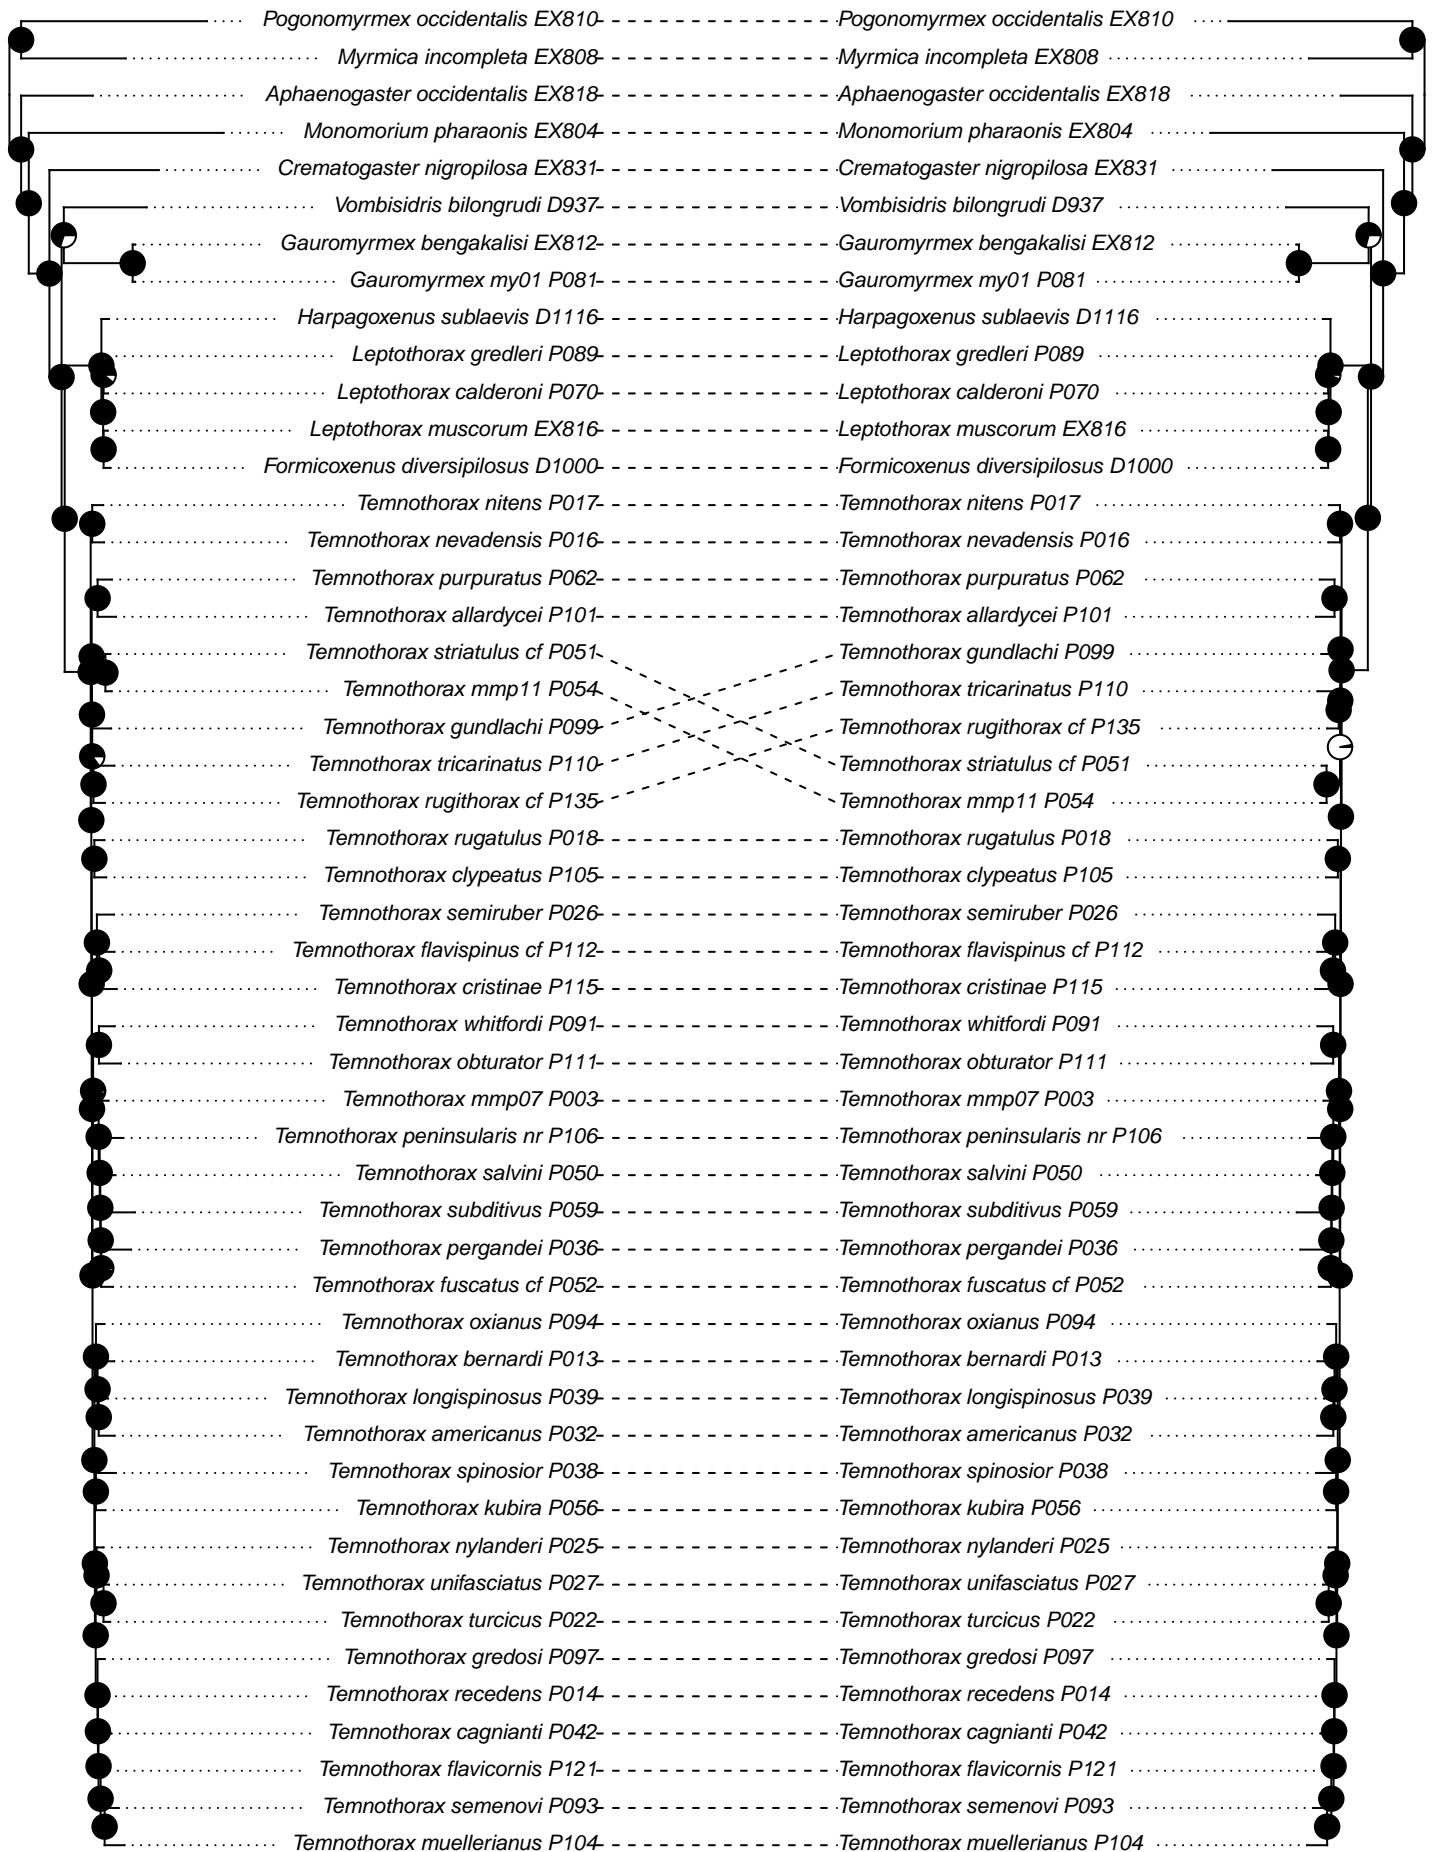

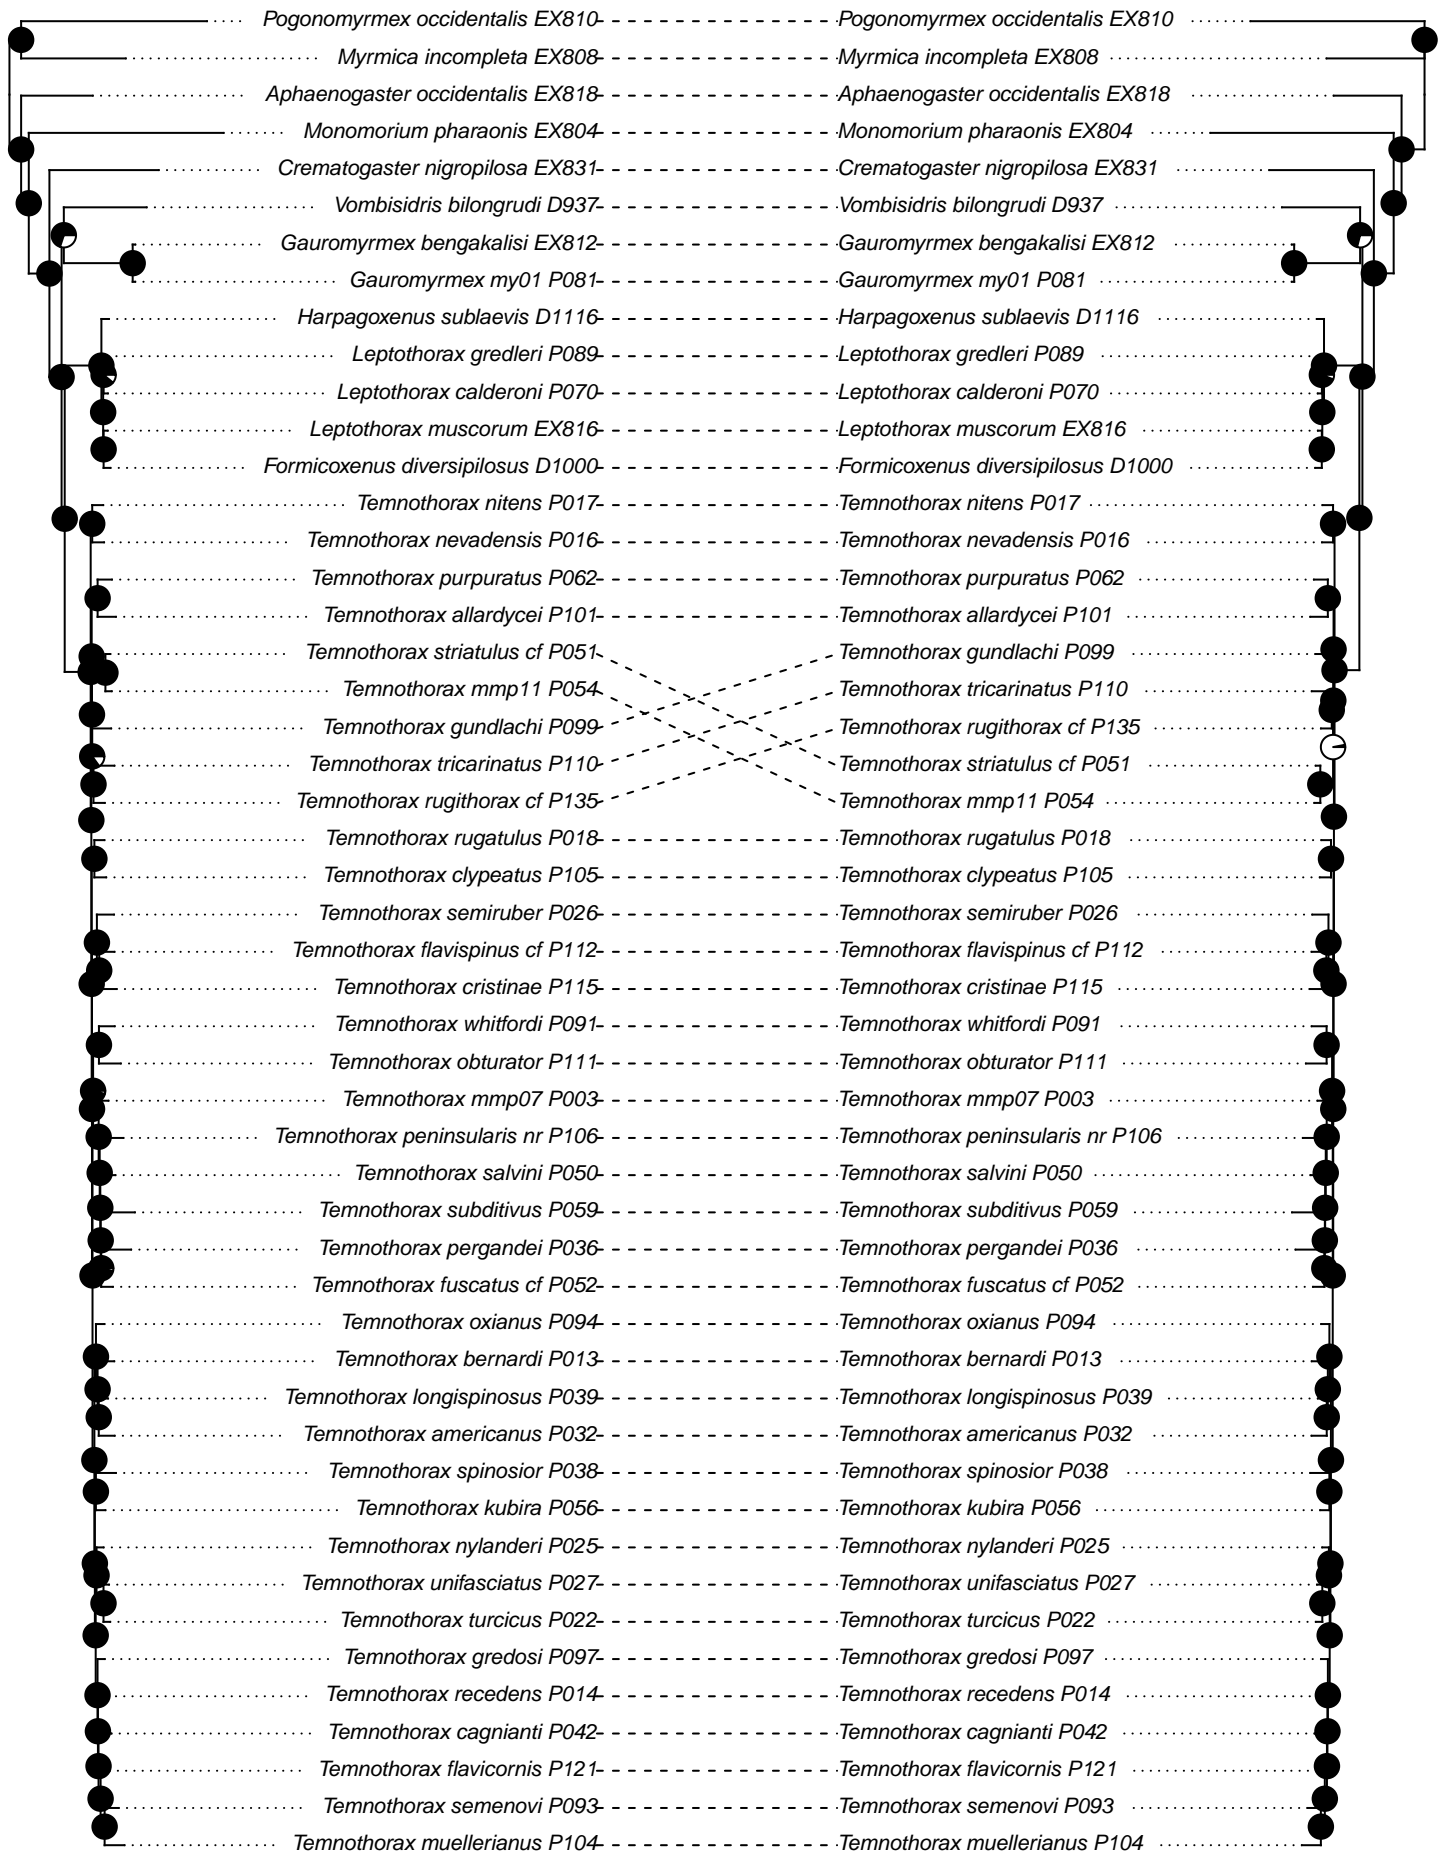

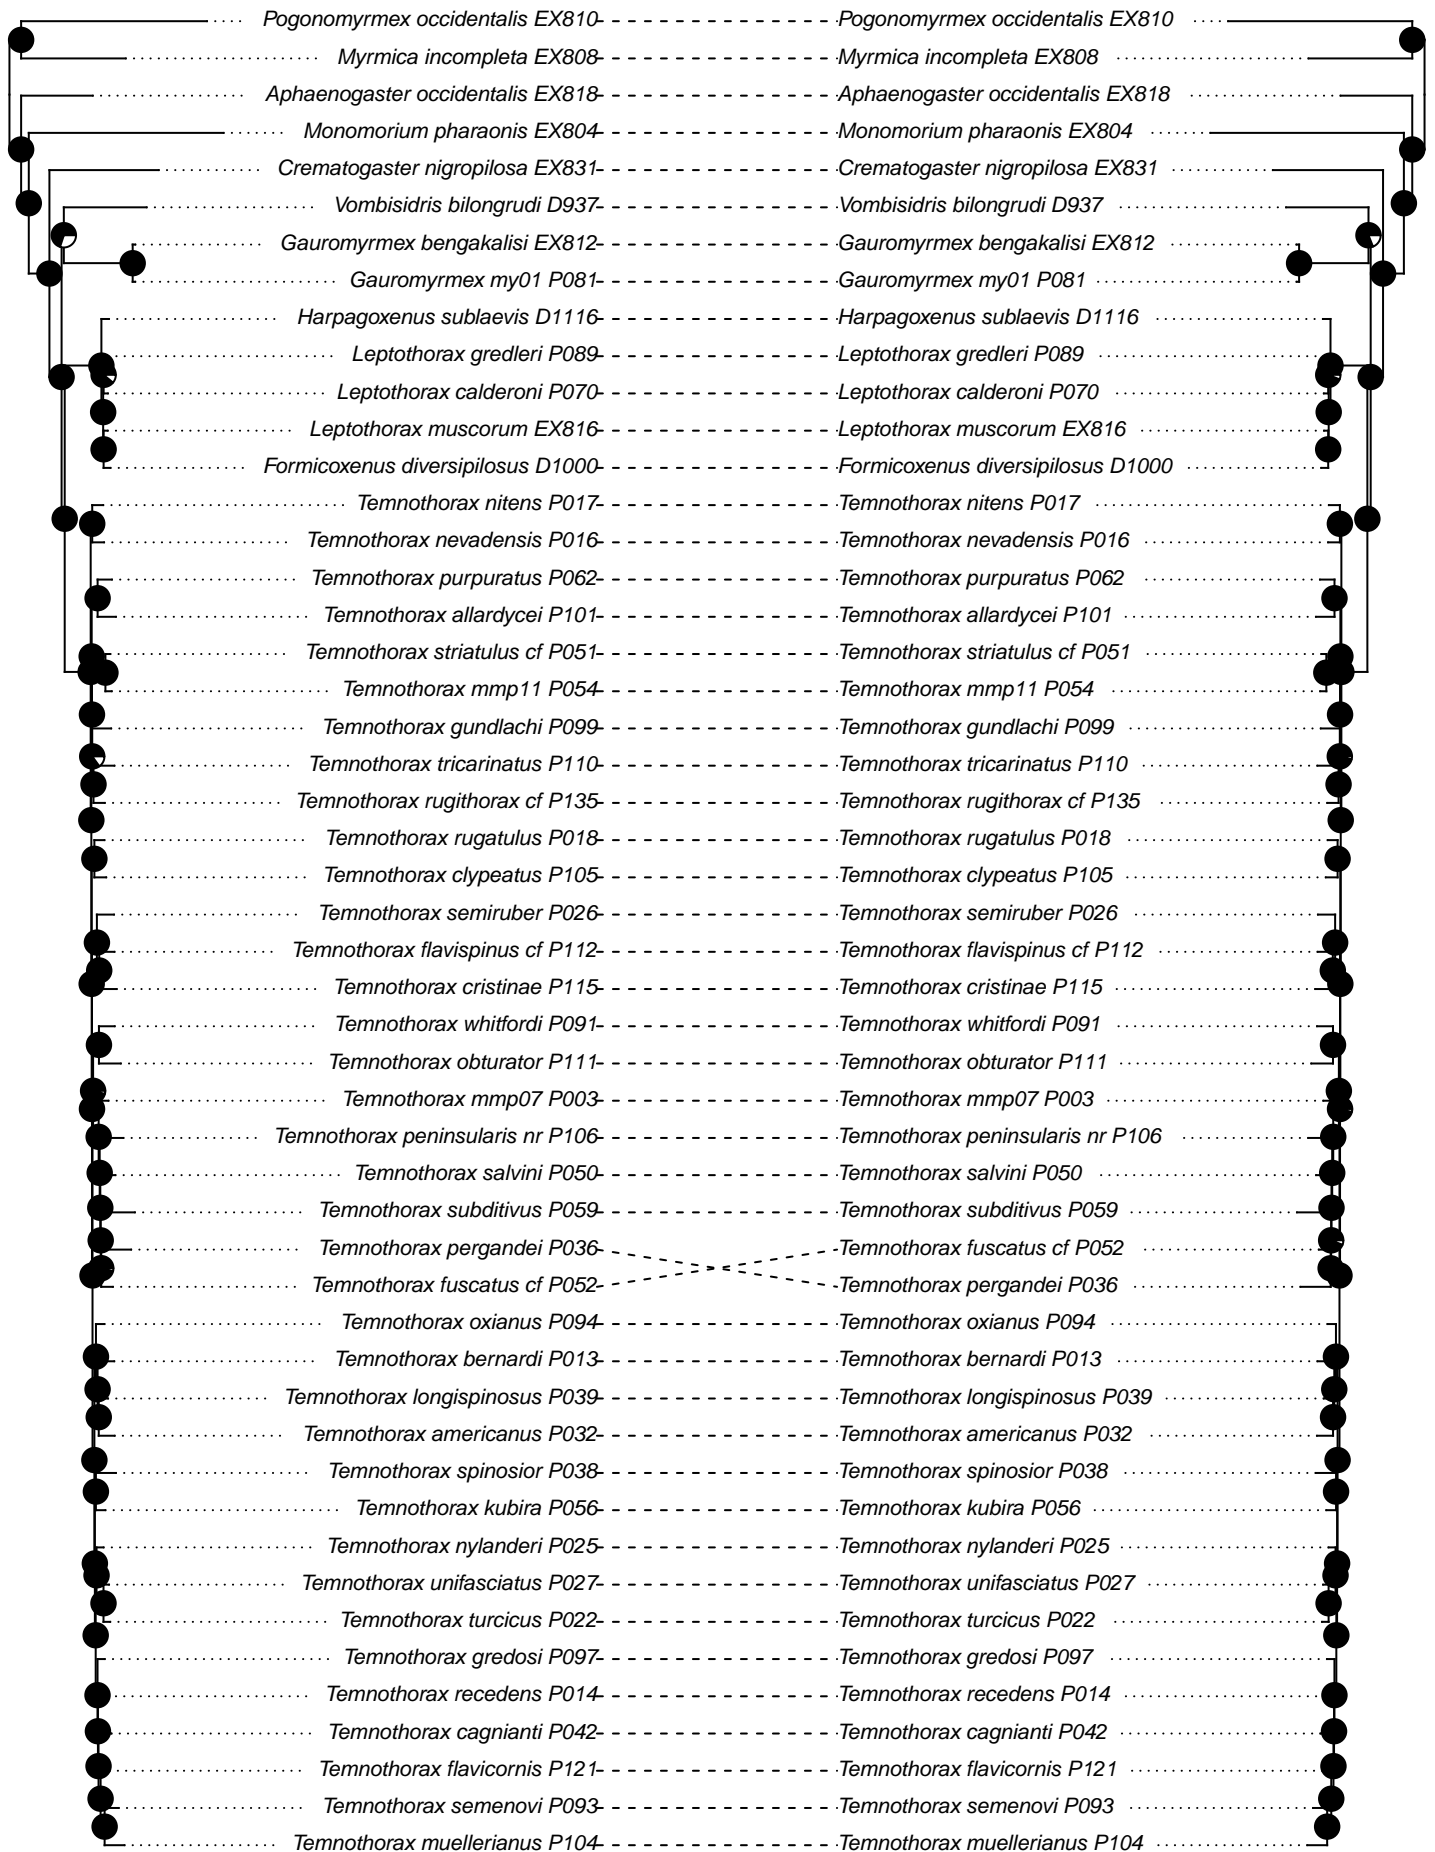

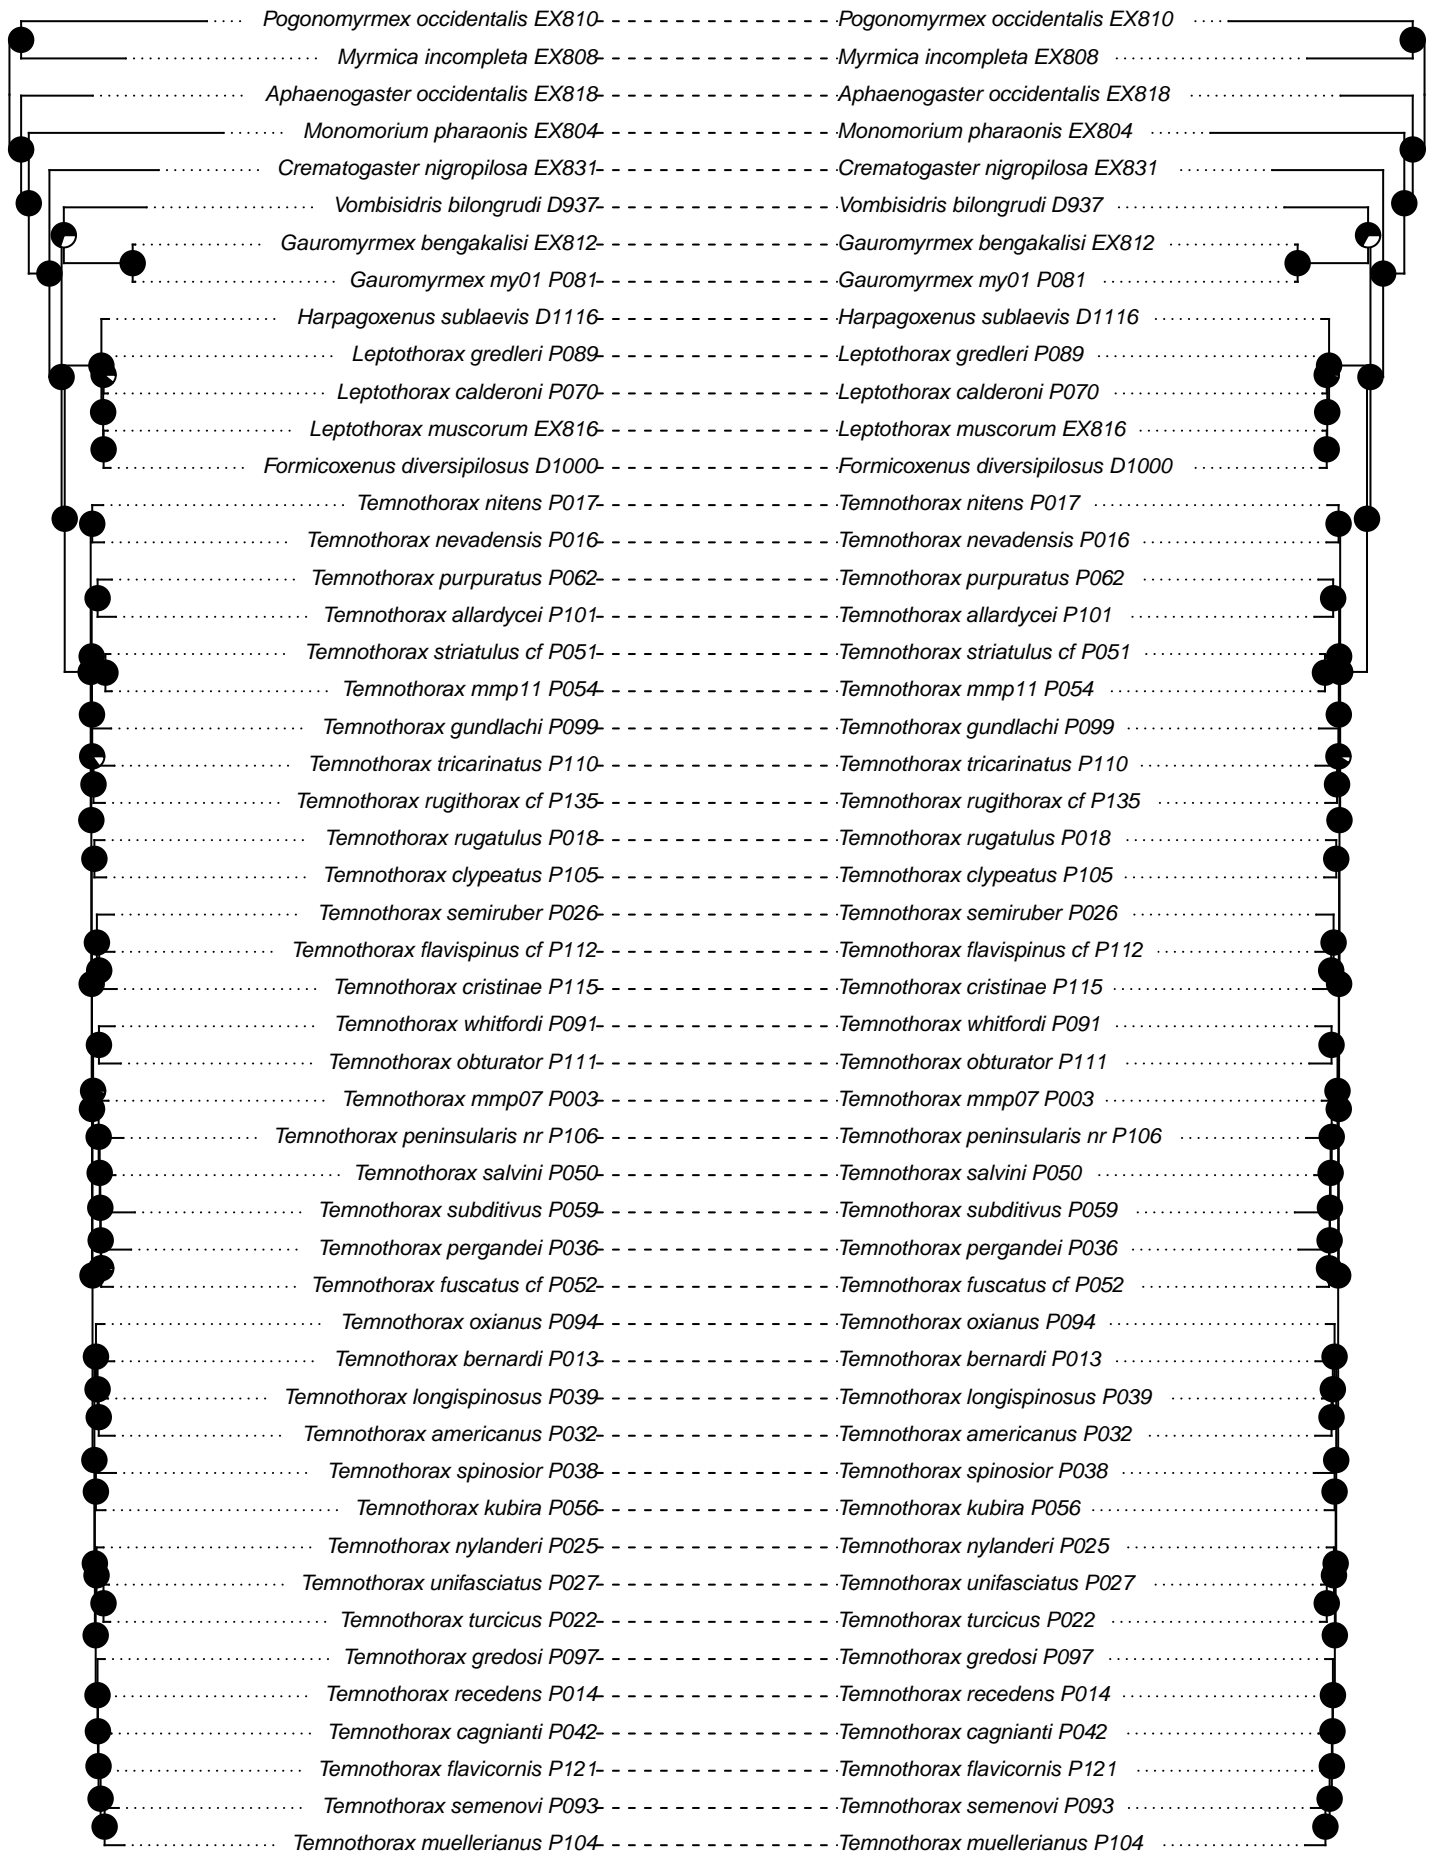

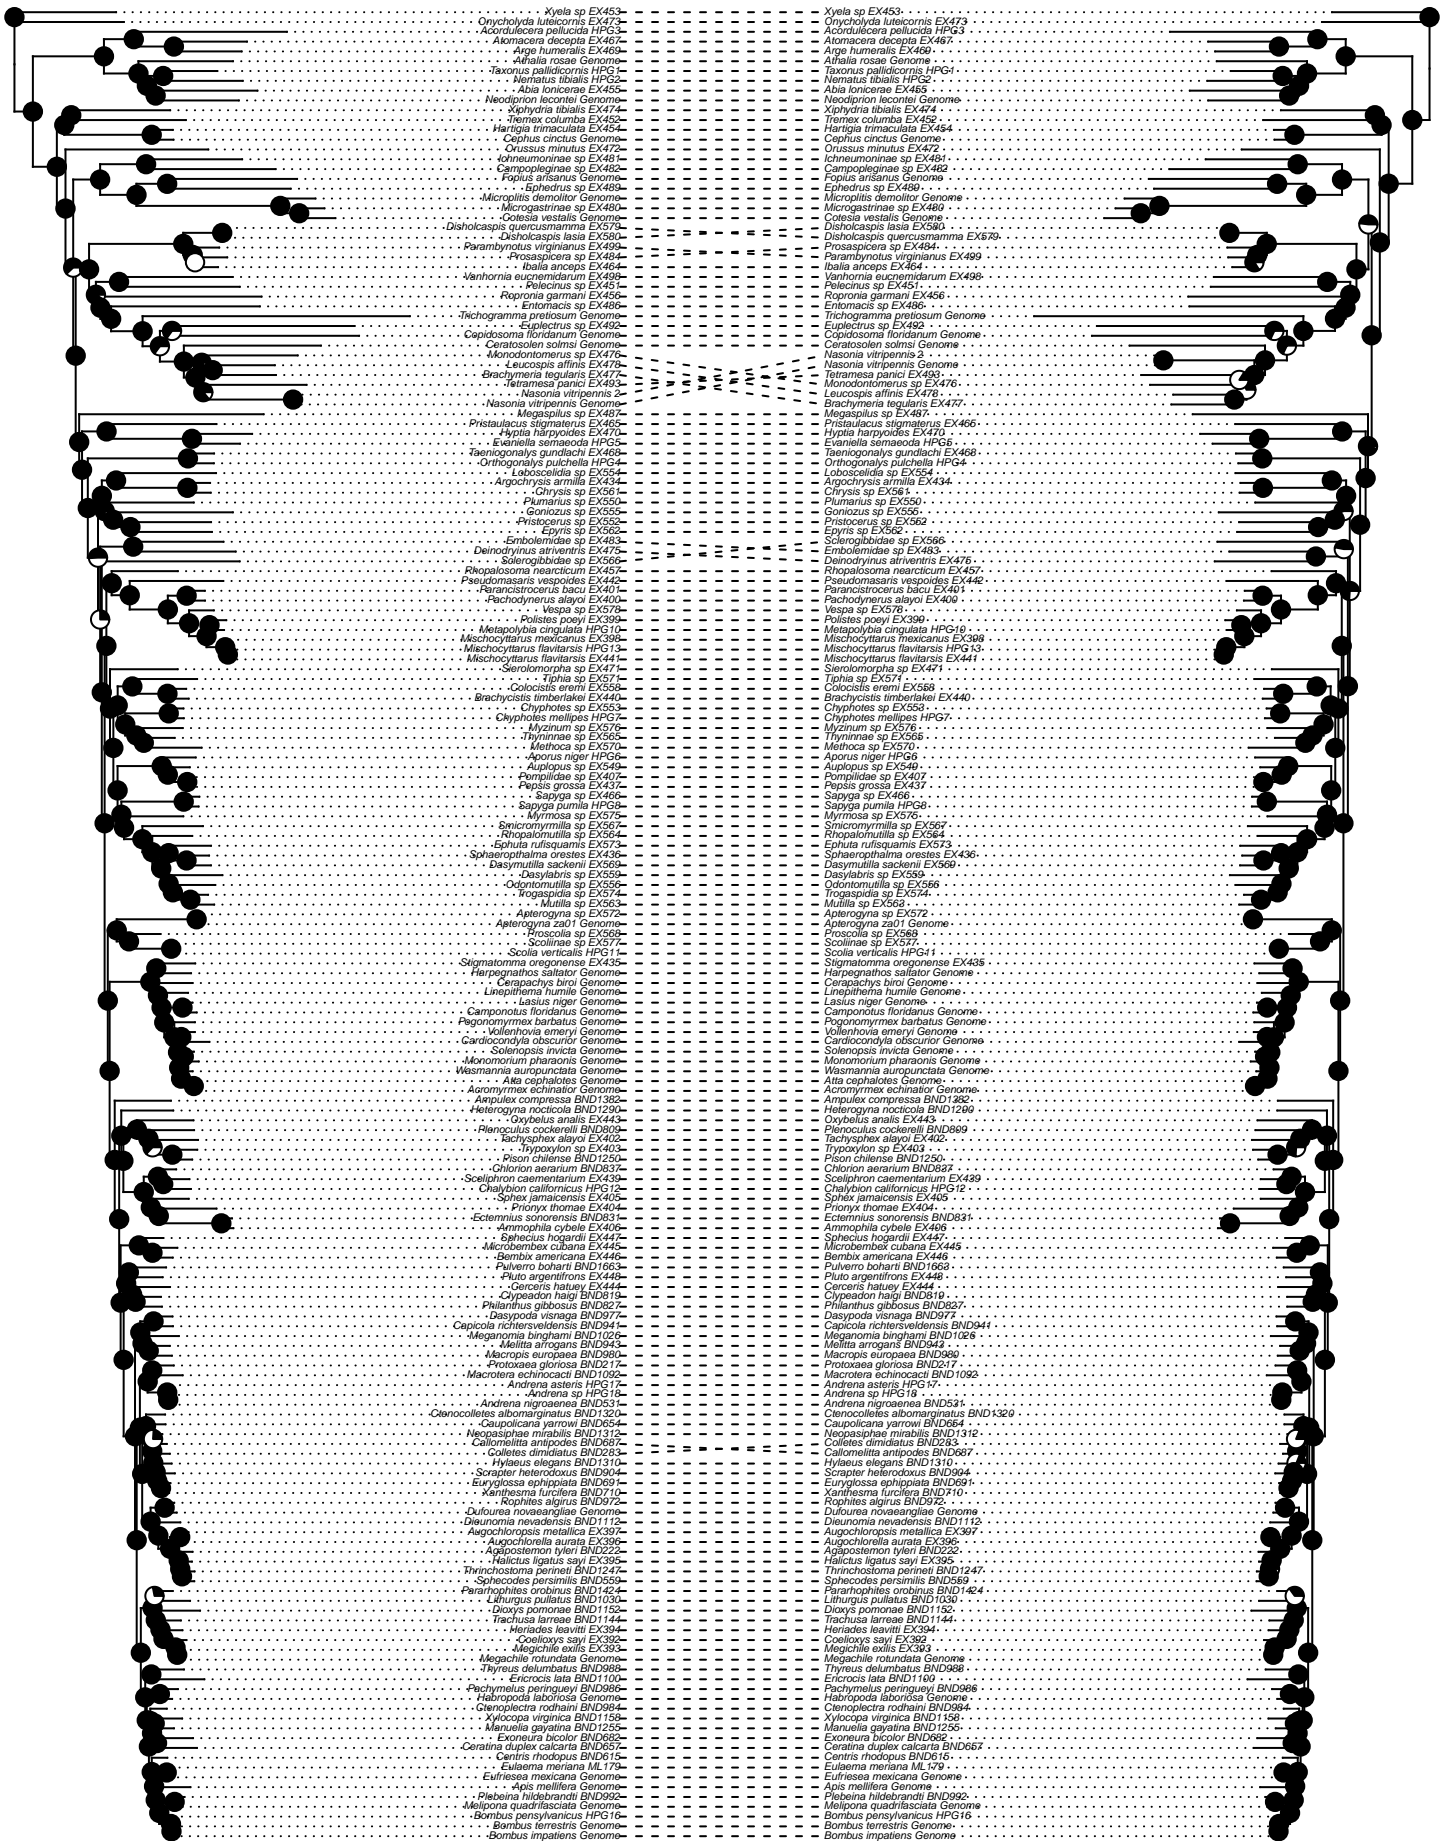

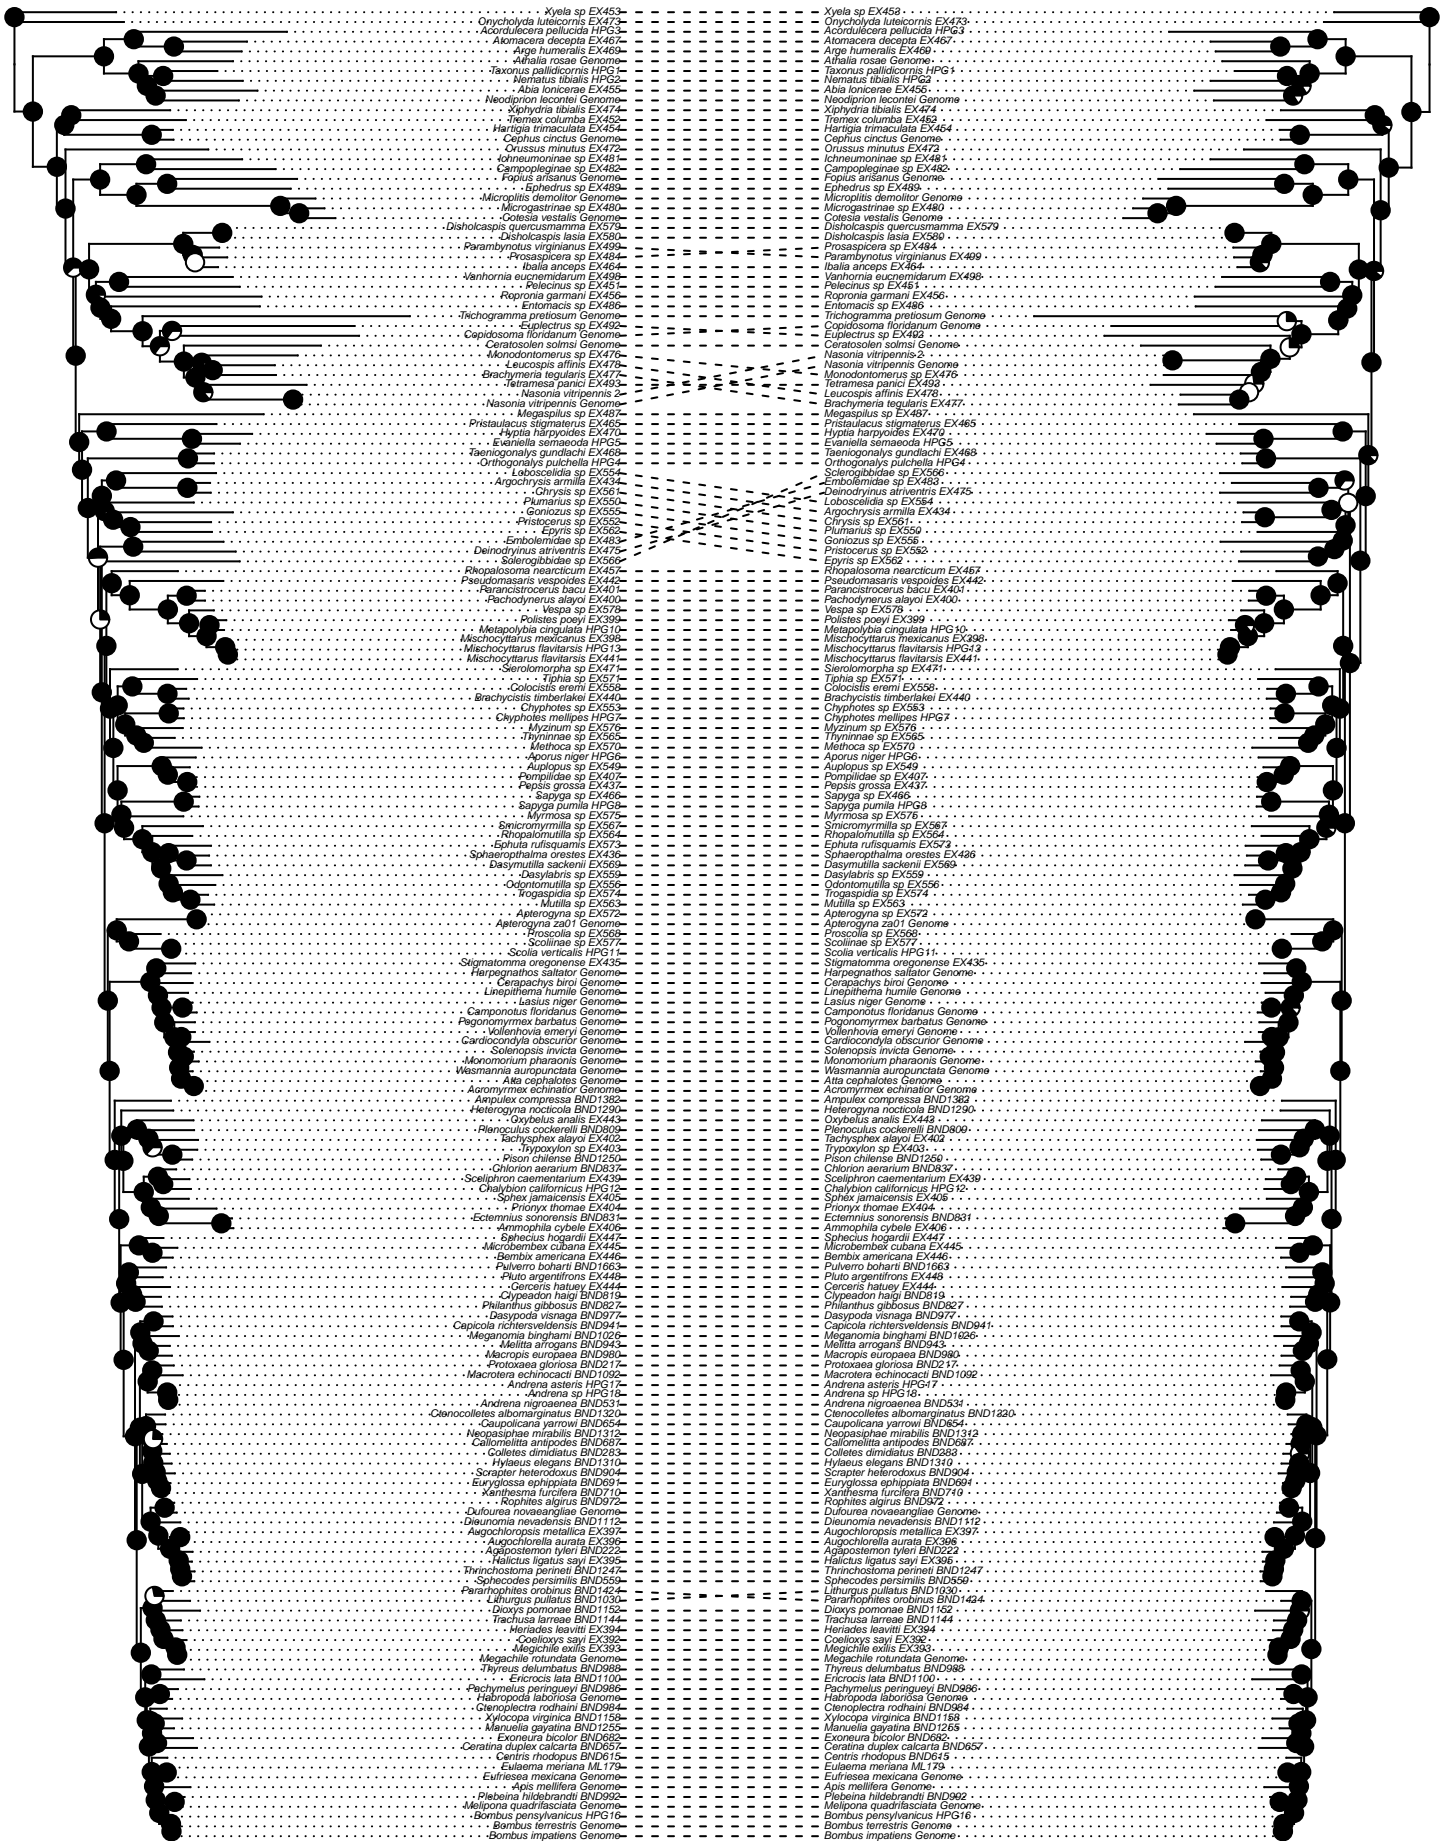

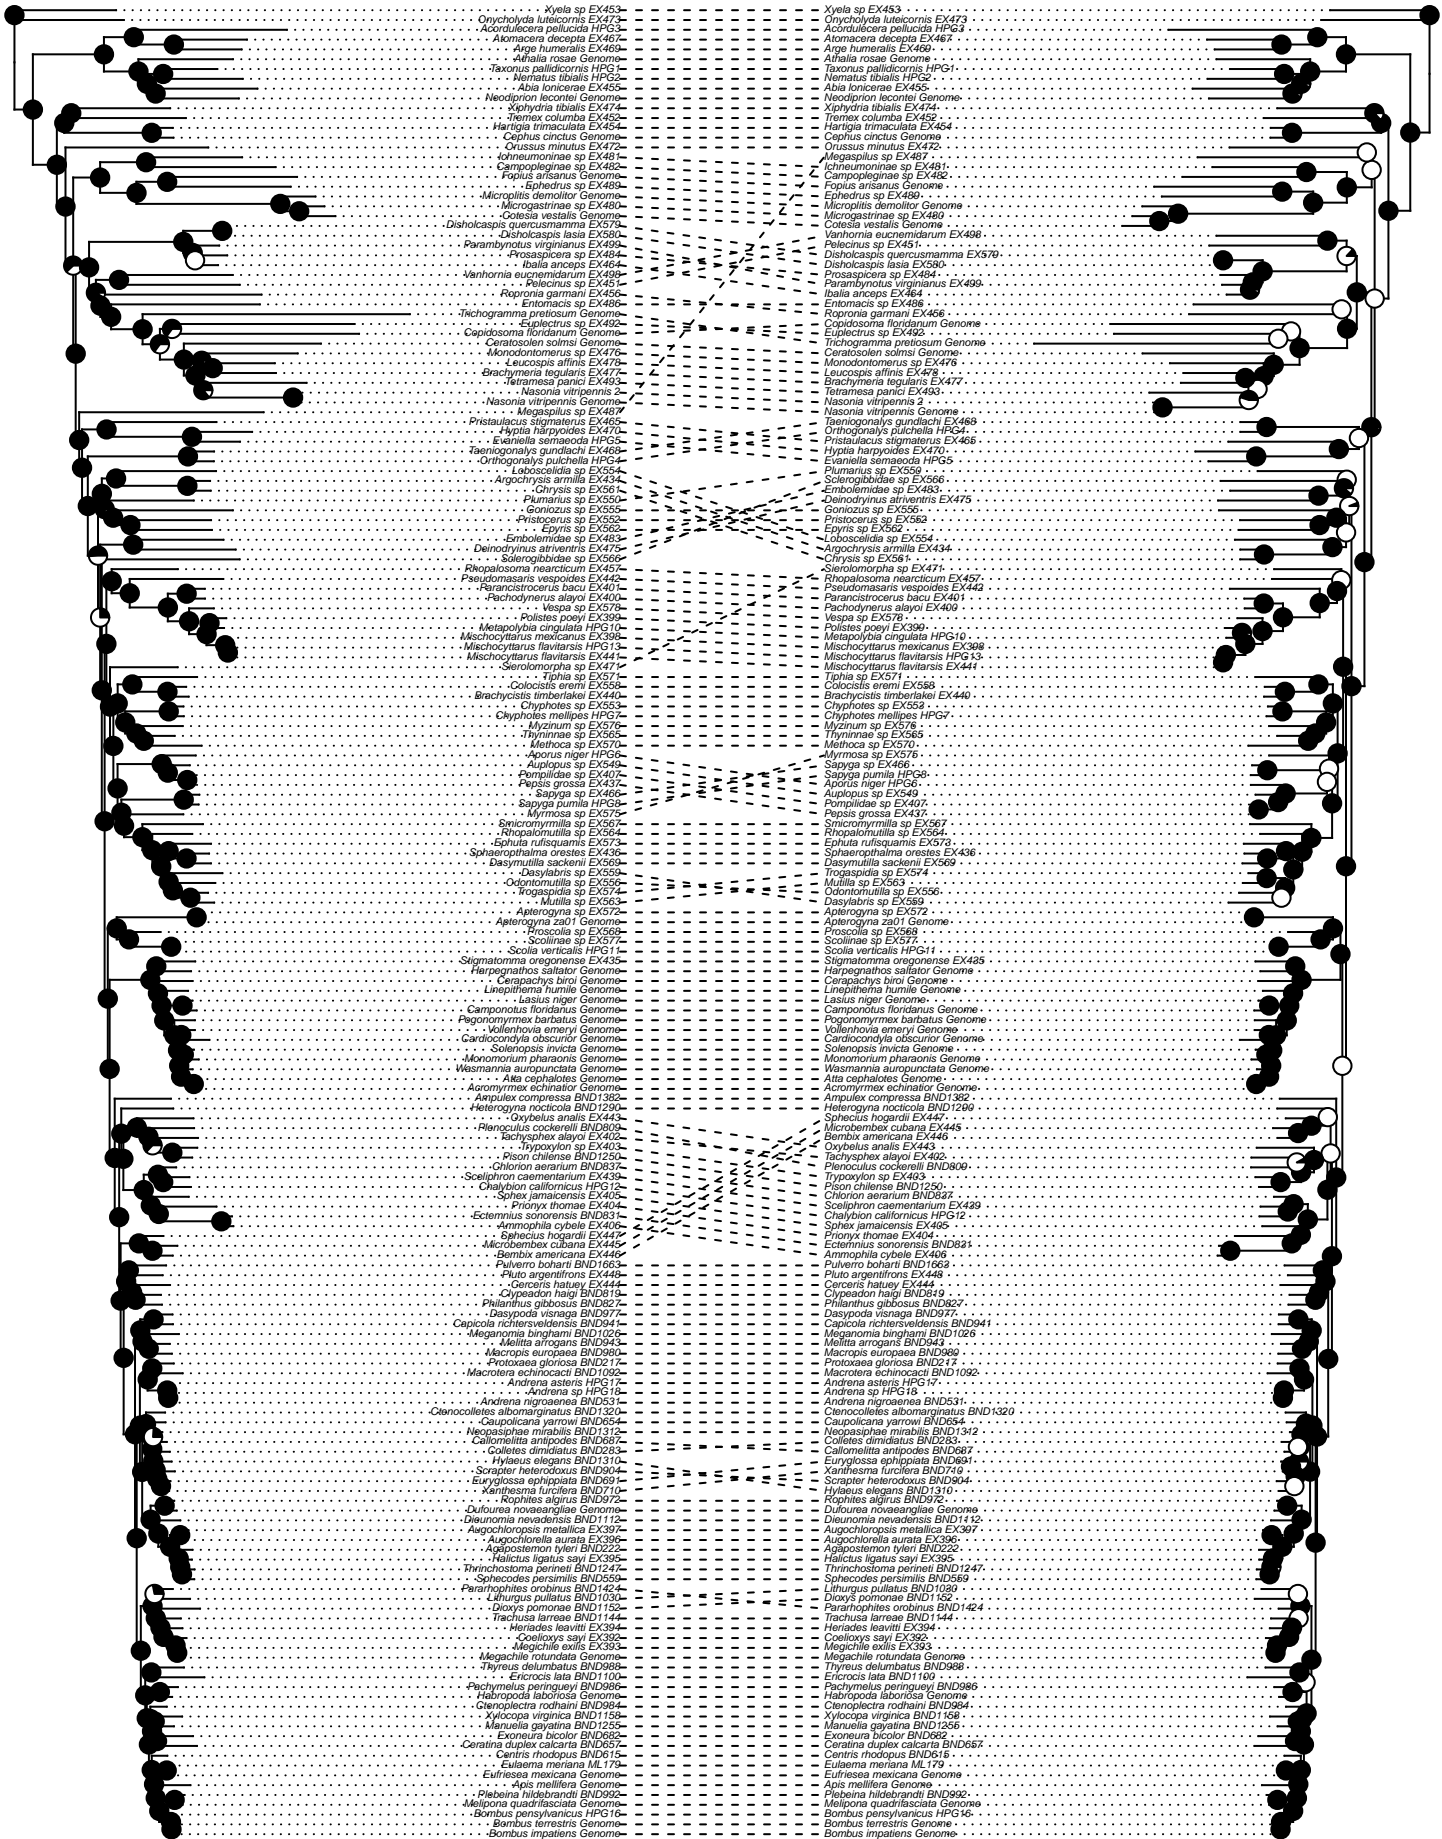

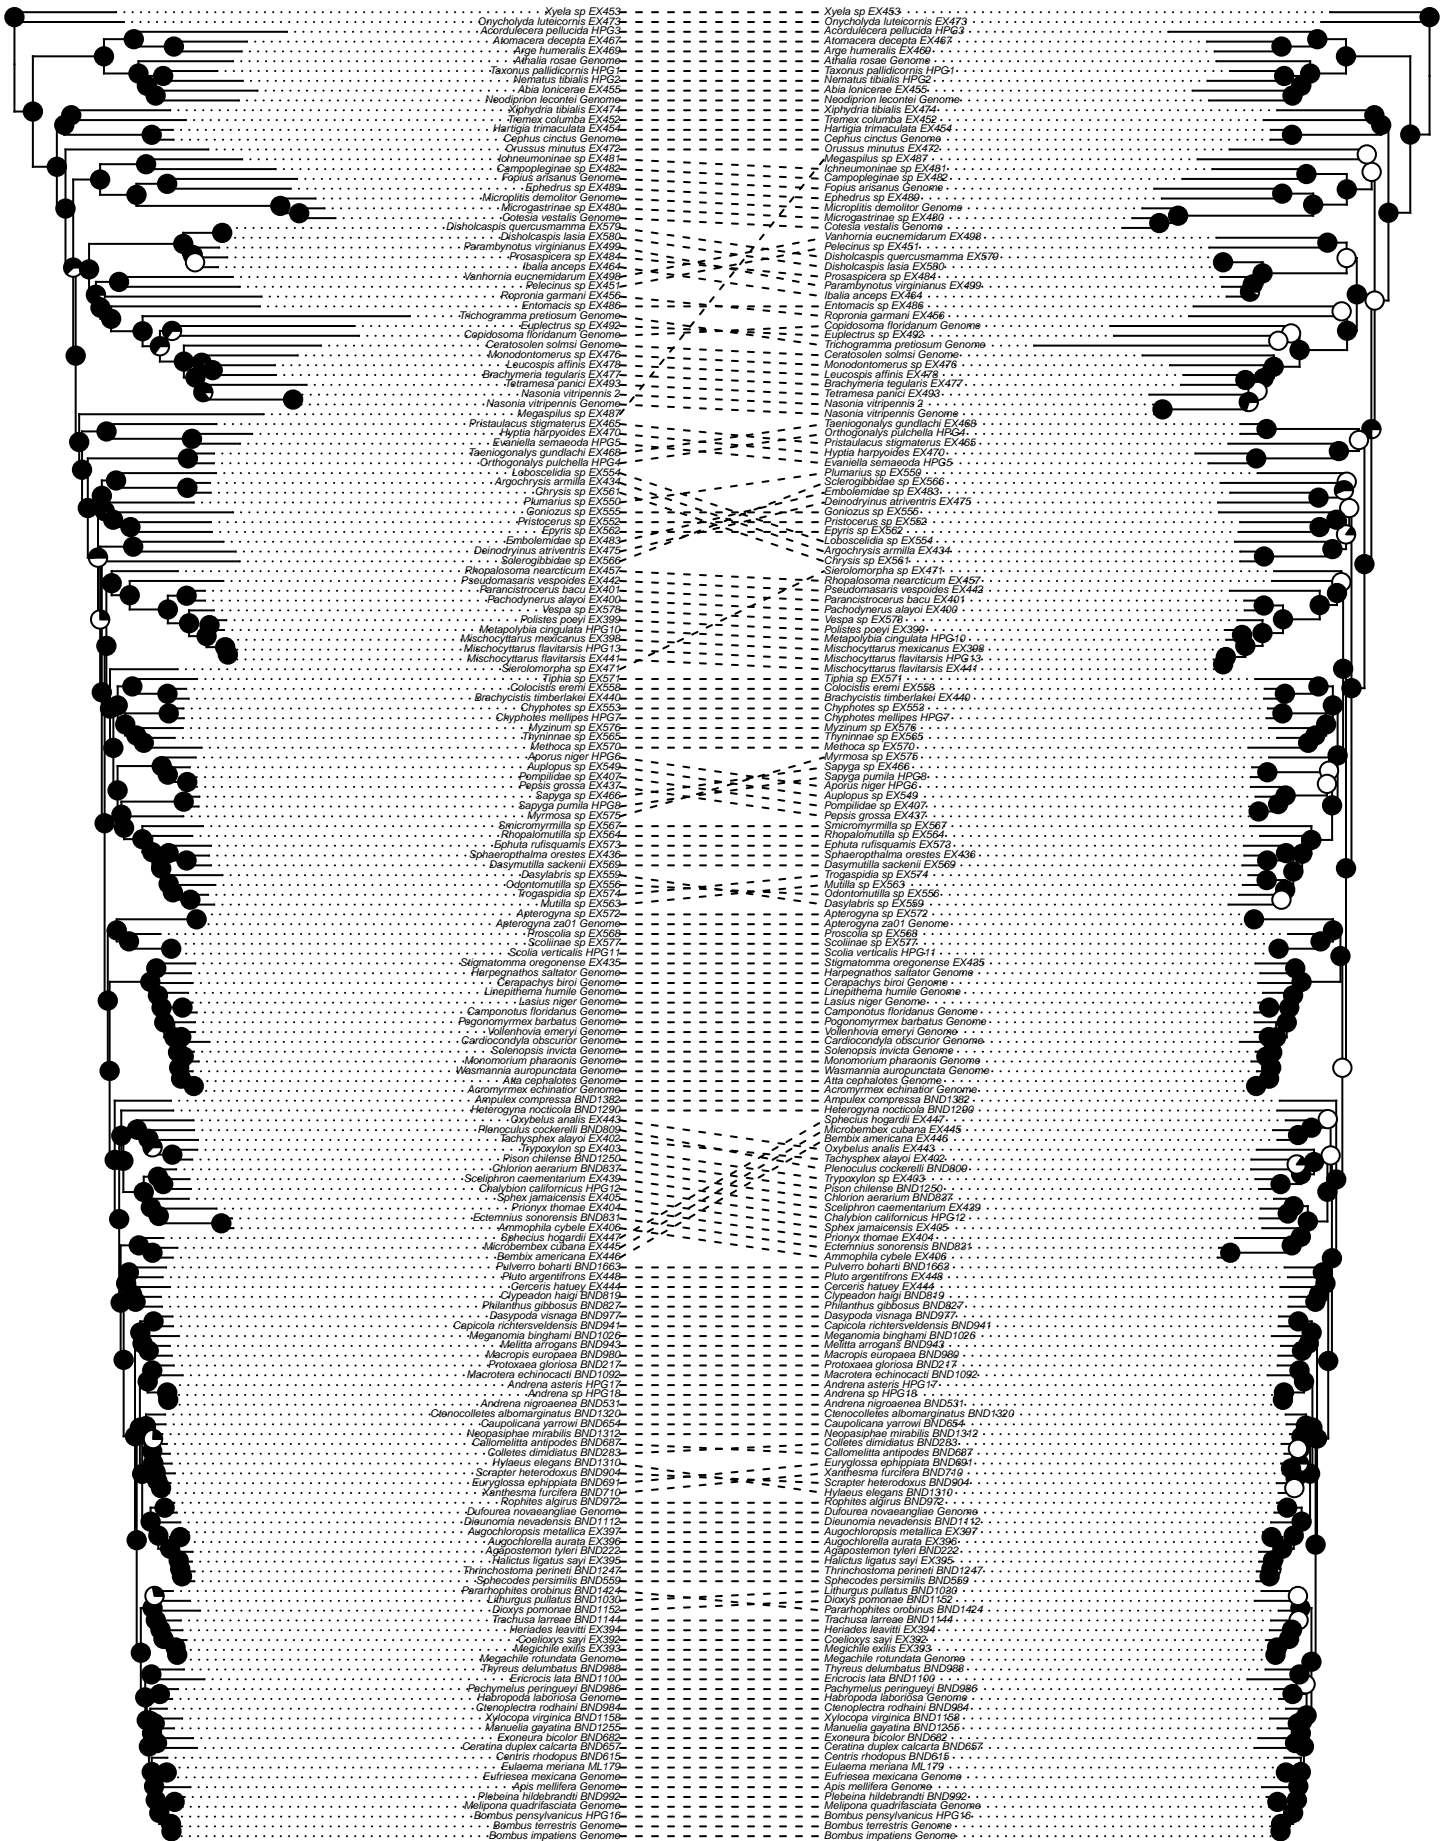



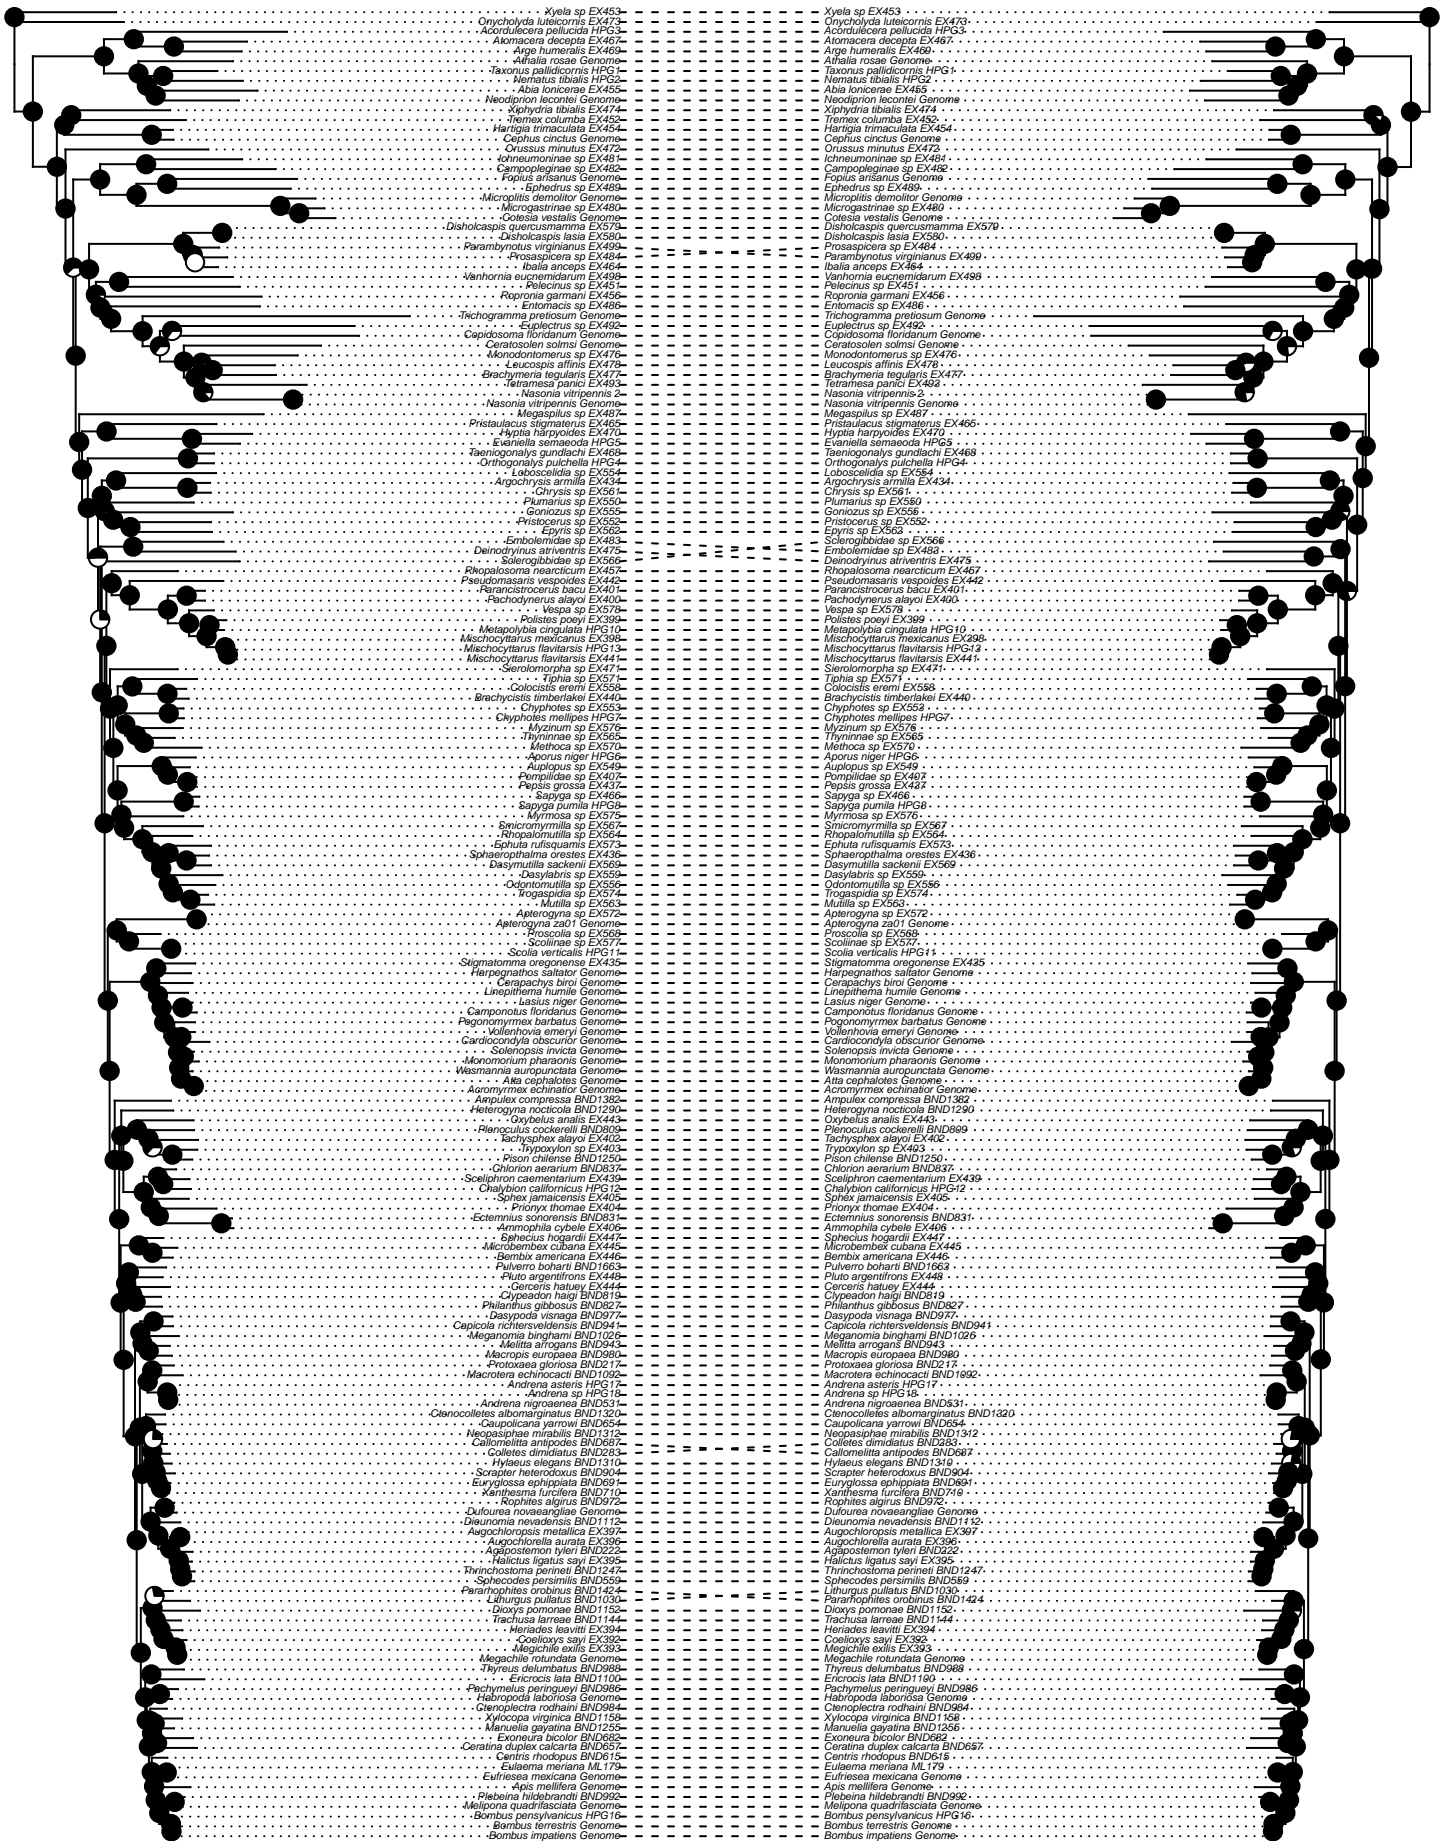

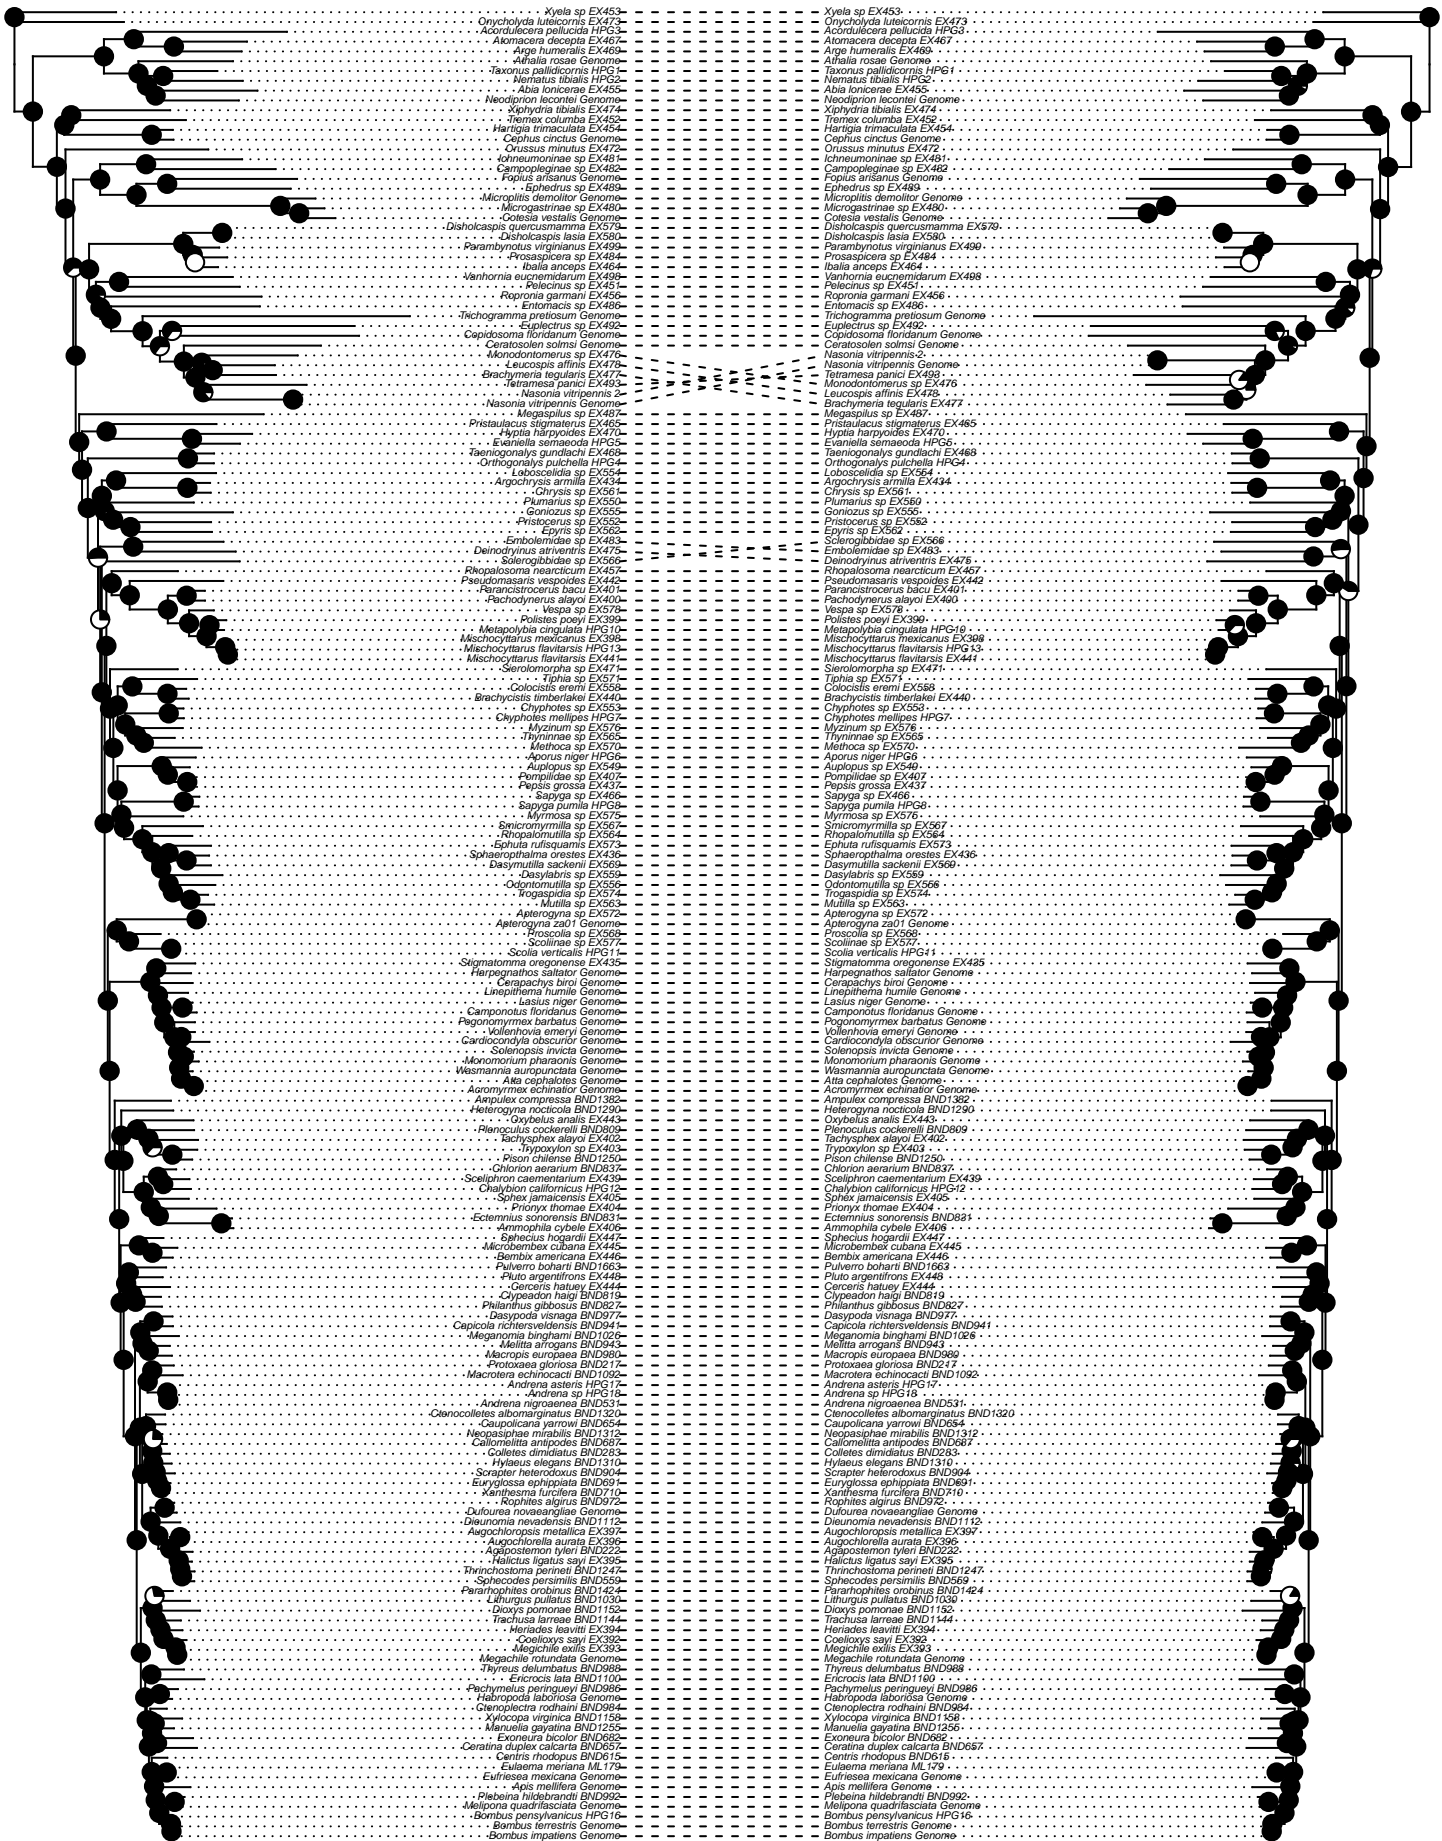

Supplement: msy069_supp.pdf [file msy069_supp.pdf]
